# Supplementary material for: Quantitative genetic parameters for yield, plant growth and cone chemical traits in hop (Humulus lupulus L.)
Source: PubMed Central journal article supplement (PMC3927220; doi:10.1186/1471-2156-15-22), 2014-02-13
Supplement: 1471-2156-15-22-S1.pdf [file 1471-2156-15-22-S1.pdf]

**Additional file 1 Least squares means for each family included in the hop quantitative genetic analysis.**

Least squares means (lower 95% limit, upper 95% limit) for each family included in the quantitative genetic analysis, for traits relating to plant growth, yield and cone chemistry in hop. ‘\*’ indicates traits for which the means have been backtransformed. **a.** refers to the traits number of shoots, length of the longest shoot and number of nodes on the longest shoot, relating to the emergence stage of plant growth. **b.** refers to the trait height, assessed at three different time points of the growing season (flower initiation, mid-season and cone maturity). **c.** refers to the traits lateral length, number of nodes on lateral and internode length, relating to the cone maturity stage of plant growth. **d.** refers to the trait height to the cones, relating to the cone maturity stage of plant growth; and green cone weight, relating to cone yield. **e.** refers to the cone chemical traits cohumulone, humulone + adhumulone, colupulone and lupulone + adlupulone. **f.** refers to the cone chemical traits  $\alpha$ -acid and  $\beta$ -acid. **g.** refers to the cone chemical traits cohumulone (% of  $\alpha$ -acid),  $\alpha$ -acid: $\beta$ -acid and  $\alpha$ -acid:total resin. All traits were assessed in two seasons of plant growth, except for green cone weight, which was assessed in only the second season.

**a.**

| Family  | number of shoots   |                      | length of the longest shoot |                       | number of nodes on the longest shoot |                    |
|---------|--------------------|----------------------|-----------------------------|-----------------------|--------------------------------------|--------------------|
|         | 11 months *        | 24 months            | 11 months *                 | 24 months *           | 11 months                            | 24 months *        |
| 2008003 | 3.71 (2.98 , 4.51) | 7.46 (6.04 , 8.89)   | 42.60 (36.53 , 49.13)       | 8.10 (5.97 , 10.56)   | 6.80 (6.30 , 7.30)                   | 2.69 (2.28 , 3.13) |
| 2008190 | 4.44 (3.64 , 5.31) | 8.17 (6.75 , 9.59)   | 44.93 (38.69 , 51.65)       | 8.94 (6.77 , 11.41)   | 7.26 (6.75 , 7.76)                   | 2.68 (2.29 , 3.11) |
| 2008209 | 4.46 (3.65 , 5.36) | 6.75 (5.29 , 8.22)   | 47.64 (41.10 , 54.67)       | 10.18 (7.56 , 13.18)  | 6.93 (6.42 , 7.44)                   | 2.80 (2.36 , 3.28) |
| 2008151 | 4.12 (3.35 , 4.96) | 5.67 (4.25 , 7.09)   | 32.71 (27.51 , 38.36)       | 8.40 (6.15 , 11.01)   | 6.01 (5.51 , 6.50)                   | 2.77 (2.34 , 3.23) |
| 2008039 | 4.88 (4.04 , 5.80) | 8.92 (7.50 , 10.34)  | 47.77 (41.43 , 54.56)       | 9.04 (6.86 , 11.52)   | 7.62 (7.13 , 8.11)                   | 2.72 (2.32 , 3.15) |
| 2008152 | 3.76 (3.03 , 4.57) | 5.72 (4.30 , 7.15)   | 48.41 (41.91 , 55.37)       | 8.51 (6.23 , 11.14)   | 7.28 (6.78 , 7.79)                   | 2.82 (2.39 , 3.29) |
| 2008001 | 4.87 (4.00 , 5.82) | 8.19 (6.68 , 9.70)   | 49.10 (42.45 , 56.23)       | 7.54 (5.56 , 9.81)    | 7.93 (7.42 , 8.45)                   | 2.62 (2.24 , 3.05) |
| 2008073 | 3.36 (2.67 , 4.13) | 5.68 (4.26 , 7.10)   | 40.51 (34.39 , 47.14)       | 5.38 (3.61 , 7.51)    | 6.63 (6.10 , 7.15)                   | 2.34 (1.95 , 2.76) |
| 2008168 | 4.55 (3.74 , 5.43) | 10.96 (9.54 , 12.38) | 48.27 (41.90 , 55.09)       | 18.45 (15.38 , 21.80) | 7.24 (6.75 , 7.73)                   | 3.40 (2.96 , 3.86) |
| 2008161 | 4.32 (3.54 , 5.19) | 7.86 (6.44 , 9.29)   | 45.66 (39.26 , 52.55)       | 7.39 (5.44 , 9.65)    | 6.69 (6.18 , 7.21)                   | 2.92 (2.51 , 3.36) |
| 2008290 | 3.57 (2.83 , 4.39) | 5.52 (4.01 , 7.03)   | 41.10 (34.81 , 47.92)       | 6.48 (4.33 , 9.05)    | 7.10 (6.57 , 7.64)                   | 2.40 (1.98 , 2.87) |
| 2008208 | 3.72 (2.99 , 4.52) | 6.35 (4.93 , 7.78)   | 38.16 (32.43 , 44.37)       | 10.07 (7.47 , 13.05)  | 6.66 (6.16 , 7.16)                   | 2.74 (2.30 , 3.22) |
| 2008251 | 4.30 (3.52 , 5.17) | 9.02 (7.60 , 10.44)  | 40.93 (34.99 , 47.35)       | 7.25 (5.38 , 9.41)    | 7.16 (6.66 , 7.66)                   | 2.65 (2.27 , 3.06) |
| 2008052 | 5.83 (4.90 , 6.85) | 10.93 (9.46 , 12.39) | 54.08 (47.21 , 61.42)       | 13.46 (10.86 , 16.34) | 7.34 (6.84 , 7.84)                   | 3.08 (2.67 , 3.52) |
| 2008037 | 4.34 (3.54 , 5.22) | 4.28 (2.82 , 5.74)   | 37.99 (32.18 , 44.29)       | 5.59 (3.70 , 7.86)    | 6.95 (6.44 , 7.46)                   | 2.10 (1.72 , 2.52) |
| 2008154 | 4.42 (3.62 , 5.29) | 9.19 (7.76 , 10.61)  | 45.27 (39.10 , 51.89)       | 10.47 (8.19 , 13.03)  | 7.13 (6.64 , 7.63)                   | 2.93 (2.53 , 3.37) |
| 2008136 | 5.90 (4.98 , 6.90) | 10.80 (9.37 , 12.22) | 53.42 (46.70 , 60.60)       | 14.87 (12.21 , 17.79) | 7.79 (7.30 , 8.28)                   | 3.61 (3.17 , 4.08) |
| 2008096 | 4.52 (3.72 , 5.40) | 9.69 (8.26 , 11.11)  | 44.13 (38.05 , 50.66)       | 15.55 (12.54 , 18.89) | 7.40 (6.91 , 7.90)                   | 3.31 (2.86 , 3.80) |
| 2008071 | 3.87 (3.12 , 4.69) | 6.18 (4.75 , 7.60)   | 38.52 (32.65 , 44.87)       | 5.66 (3.91 , 7.74)    | 6.58 (6.07 , 7.09)                   | 2.05 (1.70 , 2.44) |
| 2008124 | 5.20 (4.34 , 6.15) | 10.72 (9.30 , 12.14) | 51.69 (45.09 , 58.74)       | 13.43 (10.91 , 16.21) | 7.79 (7.29 , 8.28)                   | 2.90 (2.51 , 3.32) |
| 2008145 | 5.67 (4.77 , 6.66) | 7.86 (6.44 , 9.29)   | 45.99 (39.76 , 52.66)       | 8.54 (6.49 , 10.87)   | 7.35 (6.86 , 7.84)                   | 2.98 (2.58 , 3.42) |
| 2008084 | 5.14 (4.28 , 6.08) | 7.05 (5.62 , 8.47)   | 45.31 (39.14 , 51.92)       | 6.13 (4.15 , 8.50)    | 7.09 (6.60 , 7.59)                   | 2.14 (1.75 , 2.56) |
| 2008083 | 5.14 (4.28 , 6.07) | 8.63 (7.21 , 10.05)  | 48.29 (41.92 , 55.12)       | 11.26 (8.81 , 14.01)  | 7.66 (7.17 , 8.15)                   | 3.14 (2.71 , 3.59) |

| Family  | number of shoots |               | length of the longest shoot |                | length of the longest shoot |                 | number of nodes on the longest shoot |                 | number of nodes on the longest shoot |               |             |               |
|---------|------------------|---------------|-----------------------------|----------------|-----------------------------|-----------------|--------------------------------------|-----------------|--------------------------------------|---------------|-------------|---------------|
|         | 11 months *      |               | 24 months                   |                | 11 months *                 |                 | 24 months *                          |                 | 11 months                            |               | 24 months * |               |
|         |                  |               |                             |                |                             |                 |                                      |                 |                                      |               |             |               |
| 2008056 | 4.17             | (3.40 , 5.02) | 6.11                        | (4.69 , 7.53)  | 41.81                       | (35.80 , 48.28) | 8.12                                 | (5.80 , 10.82)  | 6.55                                 | (6.05 , 7.05) | 2.97        | (2.51 , 3.46) |
| 2008261 | 3.80             | (3.07 , 4.62) | 5.62                        | (4.20 , 7.04)  | 43.02                       | (36.71 , 49.84) | 6.08                                 | (4.26 , 8.23)   | 7.19                                 | (6.66 , 7.71) | 2.21        | (1.84 , 2.60) |
| 2008157 | 4.91             | (4.07 , 5.82) | 8.78                        | (7.36 , 10.20) | 49.14                       | (42.72 , 56.02) | 6.25                                 | (4.57 , 8.18)   | 7.10                                 | (6.61 , 7.59) | 2.64        | (2.27 , 3.04) |
| 2008006 | 4.92             | (4.08 , 5.83) | 10.98                       | (9.56 , 12.40) | 53.38                       | (46.67 , 60.54) | 15.78                                | (13.04 , 18.79) | 7.58                                 | (7.08 , 8.07) | 3.78        | (3.33 , 4.25) |
| 2008240 | 5.37             | (4.49 , 6.33) | 8.13                        | (6.71 , 9.55)  | 50.69                       | (44.16 , 57.68) | 10.33                                | (8.07 , 12.87)  | 7.29                                 | (6.80 , 7.78) | 2.75        | (2.36 , 3.17) |
| 2008103 | 4.57             | (3.76 , 5.46) | 8.56                        | (7.14 , 9.98)  | 45.20                       | (38.94 , 51.94) | 12.20                                | (9.55 , 15.18)  | 7.24                                 | (6.73 , 7.74) | 3.27        | (2.82 , 3.75) |
| 2008148 | 4.99             | (4.14 , 5.91) | 8.13                        | (6.70 , 9.55)  | 47.20                       | (40.89 , 53.96) | 7.79                                 | (5.84 , 10.02)  | 7.32                                 | (6.83 , 7.81) | 2.49        | (2.12 , 2.89) |
| 2008236 | 4.83             | (4.00 , 5.74) | 7.35                        | (5.93 , 8.78)  | 51.08                       | (44.51 , 58.09) | 8.14                                 | (6.00 , 10.60)  | 7.39                                 | (6.89 , 7.88) | 2.55        | (2.16 , 2.98) |
| 2008259 | 5.84             | (4.92 , 6.84) | 11.30                       | (9.88 , 12.72) | 56.34                       | (49.33 , 63.82) | 15.04                                | (12.28 , 18.08) | 7.70                                 | (7.20 , 8.20) | 3.45        | (3.02 , 3.92) |
| 2008191 | 4.79             | (3.94 , 5.72) | 7.95                        | (6.48 , 9.41)  | 44.62                       | (38.39 , 51.32) | 6.48                                 | (4.58 , 8.70)   | 6.78                                 | (6.27 , 7.28) | 2.28        | (1.90 , 2.68) |
| 2008242 | 5.10             | (4.24 , 6.04) | 7.27                        | (5.85 , 8.70)  | 49.69                       | (43.10 , 56.74) | 8.28                                 | (6.26 , 10.57)  | 7.42                                 | (6.91 , 7.92) | 2.41        | (2.05 , 2.81) |
| 2008248 | 4.29             | (3.50 , 5.17) | 7.84                        | (6.37 , 9.30)  | 45.79                       | (39.38 , 52.69) | 9.20                                 | (7.00 , 11.70)  | 6.84                                 | (6.32 , 7.35) | 2.95        | (2.54 , 3.40) |
| 2008010 | 4.16             | (3.39 , 5.01) | 11.34                       | (9.91 , 12.76) | 46.16                       | (39.82 , 52.96) | 14.77                                | (12.12 , 17.68) | 7.16                                 | (6.66 , 7.66) | 3.39        | (2.97 , 3.85) |
| 2008263 | 4.55             | (3.74 , 5.44) | 8.57                        | (7.15 , 9.99)  | 40.04                       | (34.16 , 46.39) | 10.80                                | (8.40 , 13.49)  | 6.75                                 | (6.25 , 7.26) | 3.03        | (2.61 , 3.48) |
| 2008153 | 4.78             | (3.95 , 5.69) | 7.47                        | (6.05 , 8.90)  | 48.11                       | (41.52 , 55.18) | 9.39                                 | (7.23 , 11.83)  | 7.22                                 | (6.70 , 7.73) | 2.82        | (2.42 , 3.24) |
| 2008119 | 4.67             | (3.85 , 5.57) | 6.55                        | (5.12 , 7.97)  | 42.45                       | (36.39 , 48.99) | 10.54                                | (7.88 , 13.59)  | 7.19                                 | (6.69 , 7.70) | 2.75        | (2.31 , 3.22) |
| 2008206 | 3.94             | (3.19 , 4.77) | 8.04                        | (6.62 , 9.47)  | 41.64                       | (35.63 , 48.11) | 7.79                                 | (5.84 , 10.03)  | 6.96                                 | (6.46 , 7.47) | 2.58        | (2.20 , 2.98) |
| 2008139 | 3.83             | (3.09 , 4.64) | 5.22                        | (3.80 , 6.65)  | 43.25                       | (36.90 , 50.11) | 5.68                                 | (3.86 , 7.85)   | 6.78                                 | (6.25 , 7.31) | 2.27        | (1.89 , 2.69) |
| 2008106 | 4.85             | (4.02 , 5.76) | 11.24                       | (9.82 , 12.66) | 52.61                       | (45.83 , 59.84) | 17.39                                | (14.41 , 20.64) | 7.79                                 | (7.29 , 8.30) | 3.85        | (3.39 , 4.35) |
| 2008122 | 4.44             | (3.63 , 5.33) | 8.34                        | (6.88 , 9.80)  | 50.86                       | (44.20 , 57.97) | 12.51                                | (9.92 , 15.40)  | 7.24                                 | (6.74 , 7.74) | 3.30        | (2.86 , 3.77) |
| 2008155 | 5.01             | (4.16 , 5.93) | 7.46                        | (6.04 , 8.88)  | 46.80                       | (40.53 , 53.53) | 9.16                                 | (6.89 , 11.75)  | 7.17                                 | (6.68 , 7.66) | 2.69        | (2.28 , 3.12) |
| 2008088 | 4.62             | (3.81 , 5.51) | 10.42                       | (9.00 , 11.84) | 45.09                       | (38.94 , 51.70) | 10.03                                | (7.80 , 12.53)  | 7.48                                 | (6.98 , 7.97) | 3.08        | (2.67 , 3.52) |
| 2008111 | 5.24             | (4.37 , 6.19) | 7.65                        | (6.23 , 9.07)  | 41.61                       | (35.72 , 47.96) | 9.73                                 | (7.45 , 12.31)  | 7.03                                 | (6.54 , 7.53) | 2.83        | (2.42 , 3.27) |
| 2008202 | 4.49             | (3.68 , 5.39) | 5.88                        | (4.42 , 7.34)  | 50.82                       | (44.16 , 57.94) | 7.75                                 | (5.60 , 10.26)  | 7.74                                 | (7.24 , 8.24) | 2.63        | (2.22 , 3.08) |
| 2008013 | 4.22             | (3.45 , 5.08) | 6.44                        | (5.02 , 7.86)  | 42.30                       | (36.36 , 48.70) | 8.60                                 | (6.32 , 11.23)  | 6.50                                 | (6.01 , 6.99) | 2.55        | (2.14 , 2.99) |
| 2008279 | 4.88             | (4.04 , 5.79) | 8.09                        | (6.67 , 9.51)  | 47.95                       | (41.39 , 55.00) | 9.27                                 | (7.06 , 11.78)  | 7.48                                 | (6.97 , 7.99) | 2.76        | (2.36 , 3.19) |
| 2008007 | 4.01             | (3.25 , 4.84) | 6.76                        | (5.34 , 8.18)  | 45.43                       | (39.15 , 52.17) | 8.96                                 | (6.72 , 11.53)  | 7.08                                 | (6.58 , 7.58) | 2.61        | (2.21 , 3.04) |
| 2008090 | 6.13             | (5.19 , 7.15) | 10.14                       | (8.72 , 11.56) | 49.15                       | (42.71 , 56.04) | 13.97                                | (11.32 , 16.91) | 7.93                                 | (7.44 , 8.42) | 3.29        | (2.86 , 3.74) |
| 2008055 | 4.33             | (3.54 , 5.19) | 7.63                        | (6.21 , 9.05)  | 46.15                       | (39.92 , 52.84) | 7.90                                 | (5.87 , 10.24)  | 6.77                                 | (6.28 , 7.27) | 2.38        | (2.01 , 2.79) |
| 2008271 | 3.74             | (3.02 , 4.55) | 6.58                        | (5.16 , 8.00)  | 47.14                       | (40.63 , 54.14) | 9.61                                 | (7.28 , 12.26)  | 7.26                                 | (6.75 , 7.78) | 2.96        | (2.54 , 3.42) |
| 2008035 | 5.00             | (4.15 , 5.92) | 9.04                        | (7.62 , 10.46) | 47.53                       | (41.11 , 54.42) | 9.06                                 | (6.95 , 11.45)  | 7.56                                 | (7.06 , 8.06) | 2.97        | (2.56 , 3.40) |
| 2008212 | 3.79             | (3.06 , 4.61) | 8.19                        | (6.77 , 9.61)  | 38.59                       | (32.82 , 44.83) | 8.78                                 | (6.64 , 11.22)  | 6.76                                 | (6.26 , 7.27) | 2.57        | (2.19 , 2.99) |
| 2008149 | 5.90             | (4.98 , 6.90) | 7.34                        | (5.92 , 8.76)  | 48.86                       | (42.45 , 55.72) | 8.92                                 | (6.68 , 11.48)  | 7.82                                 | (7.32 , 8.31) | 2.78        | (2.37 , 3.22) |
| 2008170 | 5.50             | (4.61 , 6.47) | 8.08                        | (6.66 , 9.50)  | 49.04                       | (42.62 , 55.92) | 9.30                                 | (7.23 , 11.64)  | 7.47                                 | (6.98 , 7.97) | 2.62        | (2.25 , 3.02) |
| 2008247 | 3.88             | (3.14 , 4.70) | 6.32                        | (4.90 , 7.74)  | 45.65                       | (39.35 , 52.41) | 7.14                                 | (5.22 , 9.36)   | 7.07                                 | (6.56 , 7.57) | 2.38        | (2.01 , 2.78) |
| 2008110 | 4.12             | (3.34 , 4.97) | 6.60                        | (5.13 , 8.06)  | 42.46                       | (36.30 , 49.11) | 6.87                                 | (4.99 , 9.04)   | 6.83                                 | (6.32 , 7.34) | 2.03        | (1.69 , 2.41) |

| Family  | number of shoots |               | number of shoots |                | length of the longest shoot |                 | length of the longest shoot |                 | number of nodes on the longest shoot |               | number of nodes on the longest shoot |               |
|---------|------------------|---------------|------------------|----------------|-----------------------------|-----------------|-----------------------------|-----------------|--------------------------------------|---------------|--------------------------------------|---------------|
|         | 11 months *      |               | 24 months        |                | 11 months *                 |                 | 24 months *                 |                 | 11 months                            |               | 24 months *                          |               |
|         |                  |               |                  |                |                             |                 |                             |                 |                                      |               |                                      |               |
| 2008043 | 3.34             | (2.65 , 4.10) | 6.51             | (5.09 , 7.94)  | 41.99                       | (35.85 , 48.62) | 6.72                        | (4.79 , 8.97)   | 6.76                                 | (6.25 , 7.28) | 2.43                                 | (2.04 , 2.85) |
| 2008188 | 4.11             | (3.35 , 4.95) | 6.76             | (5.34 , 8.18)  | 48.08                       | (41.62 , 55.01) | 15.98                       | (12.80 , 19.52) | 7.01                                 | (6.51 , 7.51) | 2.94                                 | (2.50 , 3.41) |
| 2008080 | 4.75             | (3.89 , 5.69) | 6.80             | (5.29 , 8.31)  | 43.43                       | (37.08 , 50.27) | 6.81                        | (4.88 , 9.07)   | 6.75                                 | (6.23 , 7.27) | 2.50                                 | (2.11 , 2.93) |
| 2008239 | 3.46             | (2.77 , 4.24) | 6.76             | (5.34 , 8.18)  | 48.38                       | (41.79 , 55.46) | 6.31                        | (4.57 , 8.32)   | 7.11                                 | (6.59 , 7.62) | 2.36                                 | (2.00 , 2.74) |
| 2008075 | 4.62             | (3.81 , 5.51) | 9.55             | (8.12 , 10.97) | 46.55                       | (40.29 , 53.27) | 13.03                       | (10.55 , 15.78) | 7.43                                 | (6.94 , 7.92) | 2.66                                 | (2.28 , 3.06) |
| 2008114 | 3.93             | (3.15 , 4.79) | 6.42             | (4.91 , 7.93)  | 35.58                       | (29.95 , 41.69) | 7.09                        | (5.03 , 9.50)   | 6.29                                 | (5.77 , 6.80) | 2.31                                 | (1.93 , 2.74) |
| 2008166 | 5.26             | (4.39 , 6.21) | 10.07            | (8.65 , 11.49) | 41.17                       | (35.31 , 47.49) | 10.74                       | (8.35 , 13.43)  | 6.80                                 | (6.31 , 7.29) | 3.21                                 | (2.77 , 3.67) |
| 2008252 | 5.02             | (4.17 , 5.95) | 8.62             | (7.19 , 10.04) | 49.60                       | (43.14 , 56.52) | 10.00                       | (7.77 , 12.51)  | 7.55                                 | (7.06 , 8.04) | 2.62                                 | (2.24 , 3.03) |
| 2008150 | 4.40             | (3.61 , 5.27) | 5.55             | (4.12 , 6.97)  | 39.32                       | (33.49 , 45.61) | 6.30                        | (4.44 , 8.48)   | 6.90                                 | (6.40 , 7.41) | 2.51                                 | (2.12 , 2.94) |
| 2008009 | 4.27             | (3.49 , 5.13) | 7.22             | (5.80 , 8.65)  | 43.89                       | (37.72 , 50.53) | 8.99                        | (6.74 , 11.56)  | 6.98                                 | (6.47 , 7.48) | 2.51                                 | (2.11 , 2.93) |
| 2008081 | 3.61             | (2.87 , 4.43) | 8.61             | (7.10 , 10.12) | 44.69                       | (38.24 , 51.65) | 10.59                       | (8.13 , 13.38)  | 6.98                                 | (6.46 , 7.51) | 3.10                                 | (2.66 , 3.57) |
| 2008041 | 4.79             | (3.96 , 5.70) | 8.78             | (7.36 , 10.21) | 46.32                       | (40.07 , 53.02) | 9.09                        | (6.90 , 11.58)  | 7.67                                 | (7.18 , 8.16) | 2.87                                 | (2.46 , 3.31) |
| 2008061 | 5.40             | (4.50 , 6.38) | 8.98             | (7.52 , 10.44) | 47.55                       | (41.12 , 54.45) | 9.51                        | (7.27 , 12.05)  | 7.13                                 | (6.63 , 7.63) | 3.01                                 | (2.59 , 3.46) |
| 2008087 | 3.70             | (2.98 , 4.50) | 8.11             | (6.69 , 9.53)  | 44.84                       | (38.61 , 51.54) | 9.21                        | (7.01 , 11.71)  | 7.18                                 | (6.68 , 7.69) | 3.01                                 | (2.59 , 3.46) |
| 2008147 | 4.53             | (3.72 , 5.41) | 9.22             | (7.79 , 10.64) | 44.49                       | (38.28 , 51.18) | 12.65                       | (10.20 , 15.36) | 7.28                                 | (6.78 , 7.78) | 3.09                                 | (2.69 , 3.53) |
| 2008258 | 4.50             | (3.70 , 5.38) | 9.32             | (7.90 , 10.74) | 49.60                       | (42.92 , 56.76) | 9.10                        | (6.91 , 11.59)  | 7.53                                 | (7.02 , 8.04) | 2.81                                 | (2.41 , 3.25) |
| 2008130 | 4.20             | (3.43 , 5.05) | 6.45             | (5.03 , 7.87)  | 41.98                       | (35.84 , 48.61) | 9.17                        | (6.81 , 11.88)  | 6.98                                 | (6.46 , 7.49) | 2.85                                 | (2.42 , 3.31) |
| 2008100 | 4.17             | (3.38 , 5.03) | 6.64             | (5.18 , 8.10)  | 40.29                       | (34.40 , 46.66) | 12.89                       | (10.26 , 15.82) | 6.54                                 | (6.04 , 7.05) | 2.91                                 | (2.50 , 3.36) |
| 2008132 | 5.03             | (4.18 , 5.96) | 10.03            | (8.61 , 11.45) | 48.35                       | (41.98 , 55.17) | 13.24                       | (10.66 , 16.09) | 7.62                                 | (7.13 , 8.11) | 3.14                                 | (2.72 , 3.58) |
| 2008256 | 5.73             | (4.82 , 6.72) | 11.04            | (9.62 , 12.46) | 48.50                       | (42.12 , 55.33) | 17.33                       | (14.46 , 20.47) | 7.66                                 | (7.17 , 8.15) | 3.21                                 | (2.80 , 3.65) |
| 2008093 | 4.12             | (3.36 , 4.97) | 6.04             | (4.62 , 7.46)  | 40.20                       | (34.31 , 46.56) | 5.21                        | (3.53 , 7.20)   | 6.59                                 | (6.09 , 7.09) | 2.01                                 | (1.66 , 2.40) |
| 2008108 | 5.75             | (4.84 , 6.74) | 11.37            | (9.95 , 12.79) | 57.26                       | (50.30 , 64.67) | 13.63                       | (11.09 , 16.43) | 7.77                                 | (7.28 , 8.26) | 3.30                                 | (2.89 , 3.75) |
| 2008179 | 4.11             | (3.34 , 4.95) | 6.67             | (5.25 , 8.09)  | 42.08                       | (36.04 , 48.58) | 5.68                        | (3.98 , 7.68)   | 7.18                                 | (6.68 , 7.68) | 2.02                                 | (1.68 , 2.39) |
| 2008192 | 4.37             | (3.57 , 5.25) | 6.20             | (4.74 , 7.67)  | 40.00                       | (34.13 , 46.35) | 11.66                       | (8.73 , 15.02)  | 6.59                                 | (6.09 , 7.10) | 3.18                                 | (2.70 , 3.71) |
| 2008089 | 3.69             | (2.97 , 4.50) | 6.91             | (5.49 , 8.34)  | 37.48                       | (31.80 , 43.62) | 9.00                        | (6.74 , 11.58)  | 6.43                                 | (5.93 , 6.94) | 2.57                                 | (2.17 , 3.00) |
| 2008064 | 4.40             | (3.61 , 5.27) | 8.29             | (6.87 , 9.71)  | 45.41                       | (39.24 , 52.03) | 12.03                       | (9.58 , 14.76)  | 7.04                                 | (6.55 , 7.53) | 2.87                                 | (2.47 , 3.29) |
| 2008269 | 4.82             | (3.97 , 5.74) | 7.86             | (6.40 , 9.33)  | 46.21                       | (39.89 , 53.01) | 6.68                        | (4.89 , 8.75)   | 7.48                                 | (6.97 , 7.98) | 2.59                                 | (2.22 , 3.00) |
| 2008059 | 4.12             | (3.36 , 4.97) | 5.25             | (3.83 , 6.67)  | 39.97                       | (34.19 , 46.19) | 6.14                        | (4.31 , 8.31)   | 6.73                                 | (6.24 , 7.22) | 2.21                                 | (1.85 , 2.62) |
| 2008047 | 4.98             | (4.14 , 5.91) | 5.98             | (4.56 , 7.40)  | 42.84                       | (36.76 , 49.39) | 3.88                        | (2.55 , 5.49)   | 6.98                                 | (6.47 , 7.48) | 1.86                                 | (1.54 , 2.21) |
| 2008194 | 4.07             | (3.31 , 4.91) | 7.54             | (6.12 , 8.97)  | 44.31                       | (38.22 , 50.86) | 7.94                        | (5.91 , 10.27)  | 7.09                                 | (6.60 , 7.59) | 2.49                                 | (2.11 , 2.90) |
| 2008232 | 3.87             | (3.13 , 4.69) | 7.20             | (5.78 , 8.62)  | 39.21                       | (33.40 , 45.50) | 8.82                        | (6.68 , 11.27)  | 6.41                                 | (5.90 , 6.91) | 2.41                                 | (2.03 , 2.81) |
| 2008173 | 4.14             | (3.37 , 4.98) | 8.57             | (7.15 , 10.00) | 38.79                       | (33.10 , 44.94) | 7.67                        | (5.68 , 9.96)   | 6.36                                 | (5.87 , 6.85) | 2.59                                 | (2.20 , 3.01) |
| 2008120 | 3.78             | (3.03 , 4.60) | 6.54             | (5.08 , 8.01)  | 43.80                       | (37.41 , 50.69) | 7.62                        | (5.70 , 9.83)   | 6.98                                 | (6.46 , 7.51) | 2.50                                 | (2.13 , 2.90) |
| 2008262 | 4.53             | (3.71 , 5.43) | 6.88             | (5.42 , 8.35)  | 39.70                       | (33.85 , 46.01) | 7.02                        | (5.11 , 9.23)   | 6.70                                 | (6.20 , 7.20) | 2.36                                 | (1.98 , 2.76) |
| 2008187 | 4.56             | (3.75 , 5.45) | 8.55             | (7.13 , 9.97)  | 45.77                       | (39.56 , 52.42) | 10.89                       | (8.63 , 13.41)  | 6.79                                 | (6.30 , 7.29) | 2.95                                 | (2.56 , 3.37) |
| 2008051 | 3.87             | (3.12 , 4.71) | 7.16             | (5.69 , 8.62)  | 42.20                       | (35.94 , 48.95) | 12.41                       | (9.64 , 15.53)  | 6.82                                 | (6.30 , 7.35) | 3.16                                 | (2.71 , 3.65) |

| Family  | number of shoots |               | length of the longest shoot |                | length of the longest shoot |                 | number of nodes on the longest shoot |                 | number of nodes on the longest shoot |               |             |               |
|---------|------------------|---------------|-----------------------------|----------------|-----------------------------|-----------------|--------------------------------------|-----------------|--------------------------------------|---------------|-------------|---------------|
|         | 11 months *      |               | 24 months                   |                | 11 months *                 |                 | 24 months *                          |                 | 11 months                            |               | 24 months * |               |
|         |                  |               |                             |                |                             |                 |                                      |                 |                                      |               |             |               |
| 2008198 | 3.94             | (3.15 , 4.82) | 7.05                        | (5.48 , 8.61)  | 45.98                       | (39.18 , 53.32) | 9.41                                 | (6.91 , 12.29)  | 7.32                                 | (6.77 , 7.87) | 2.76        | (2.32 , 3.24) |
| 2008054 | 4.84             | (4.01 , 5.75) | 7.12                        | (5.70 , 8.54)  | 47.29                       | (40.77 , 54.31) | 7.25                                 | (5.31 , 9.48)   | 7.58                                 | (7.07 , 8.10) | 2.57        | (2.19 , 2.99) |
| 2008244 | 4.96             | (4.11 , 5.88) | 5.50                        | (4.07 , 6.92)  | 43.53                       | (37.40 , 50.14) | 7.96                                 | (5.77 , 10.49)  | 7.11                                 | (6.60 , 7.61) | 2.36        | (1.97 , 2.78) |
| 2008177 | 3.40             | (2.71 , 4.17) | 5.09                        | (3.67 , 6.51)  | 42.07                       | (35.94 , 48.69) | 5.78                                 | (3.77 , 8.22)   | 6.71                                 | (6.19 , 7.22) | 2.27        | (1.86 , 2.72) |
| 2008117 | 4.58             | (3.77 , 5.47) | 6.71                        | (5.28 , 8.13)  | 48.15                       | (41.77 , 54.98) | 10.53                                | (7.86 , 13.58)  | 6.87                                 | (6.38 , 7.36) | 2.98        | (2.52 , 3.48) |
| 2008016 | 5.09             | (4.23 , 6.02) | 6.54                        | (5.12 , 7.96)  | 45.67                       | (39.38 , 52.44) | 13.02                                | (10.03 , 16.39) | 7.00                                 | (6.50 , 7.50) | 3.12        | (2.65 , 3.63) |
| 2008267 | 4.20             | (3.42 , 5.07) | 7.86                        | (6.40 , 9.33)  | 47.33                       | (40.81 , 54.34) | 8.79                                 | (6.72 , 11.15)  | 7.19                                 | (6.67 , 7.70) | 2.65        | (2.27 , 3.06) |
| 2008040 | 4.00             | (3.25 , 4.83) | 7.69                        | (6.27 , 9.11)  | 47.76                       | (41.42 , 54.55) | 10.43                                | (8.16 , 12.98)  | 6.98                                 | (6.49 , 7.48) | 2.84        | (2.44 , 3.26) |
| 2008218 | 4.12             | (3.35 , 4.96) | 6.94                        | (5.51 , 8.36)  | 45.24                       | (38.85 , 52.11) | 7.43                                 | (5.12 , 10.17)  | 7.26                                 | (6.74 , 7.77) | 2.44        | (2.01 , 2.90) |
| 2008070 | 4.49             | (3.69 , 5.36) | 5.70                        | (4.28 , 7.12)  | 42.74                       | (36.76 , 49.17) | 10.24                                | (7.73 , 13.10)  | 6.81                                 | (6.32 , 7.30) | 2.54        | (2.13 , 2.98) |
| 2008102 | 3.02             | (2.36 , 3.76) | 5.83                        | (4.36 , 7.30)  | 39.53                       | (33.24 , 46.36) | 5.37                                 | (3.59 , 7.50)   | 6.70                                 | (6.15 , 7.25) | 2.11        | (1.74 , 2.51) |
| 2008078 | 6.22             | (5.27 , 7.24) | 10.85                       | (9.43 , 12.27) | 45.74                       | (39.55 , 52.39) | 10.67                                | (8.44 , 13.16)  | 7.32                                 | (6.82 , 7.81) | 2.79        | (2.41 , 3.20) |
| 2008074 | 4.06             | (3.29 , 4.92) | 8.54                        | (7.07 , 10.01) | 39.36                       | (33.32 , 45.91) | 10.93                                | (8.43 , 13.76)  | 6.42                                 | (5.89 , 6.94) | 2.89        | (2.46 , 3.34) |

b.

| Family  | height (at flower initiation) |               | height (at flower initiation) |               | height (mid-season) |               | height (mid-season) |               | height (at cone maturity) |               | height (at cone maturity) |               |
|---------|-------------------------------|---------------|-------------------------------|---------------|---------------------|---------------|---------------------|---------------|---------------------------|---------------|---------------------------|---------------|
|         | 13 months                     |               | 25 months                     |               | 14 months           |               | 26 months           |               | 16 months                 |               | 28 months                 |               |
|         |                               |               |                               |               |                     |               |                     |               |                           |               |                           |               |
| 2008003 | 3.53                          | (3.30 , 3.77) | 4.87                          | (4.66 , 5.09) | 4.21                | (3.97 , 4.44) | 5.36                | (5.23 , 5.49) | 4.32                      | (4.14 , 4.50) | 4.31                      | (4.13 , 4.50) |
| 2008190 | 3.78                          | (3.55 , 4.02) | 5.00                          | (4.79 , 5.21) | 4.42                | (4.18 , 4.66) | 5.67                | (5.54 , 5.80) | 4.55                      | (4.36 , 4.73) | 4.56                      | (4.37 , 4.74) |
| 2008209 | 3.63                          | (3.40 , 3.87) | 4.81                          | (4.59 , 5.02) | 4.35                | (4.09 , 4.61) | 5.48                | (5.34 , 5.61) | 4.42                      | (4.24 , 4.61) | 4.43                      | (4.24 , 4.62) |
| 2008151 | 3.45                          | (3.21 , 3.68) | 5.03                          | (4.81 , 5.24) | 4.25                | (4.01 , 4.49) | 5.75                | (5.62 , 5.88) | 4.38                      | (4.20 , 4.57) | 4.55                      | (4.36 , 4.74) |
| 2008039 | 3.90                          | (3.66 , 4.13) | 5.10                          | (4.89 , 5.32) | 4.55                | (4.31 , 4.78) | 5.58                | (5.45 , 5.71) | 4.62                      | (4.44 , 4.81) | 4.64                      | (4.45 , 4.82) |
| 2008152 | 3.69                          | (3.45 , 3.92) | 5.13                          | (4.92 , 5.35) | 4.45                | (4.20 , 4.70) | 5.67                | (5.54 , 5.80) | 4.65                      | (4.46 , 4.83) | 4.66                      | (4.48 , 4.85) |
| 2008001 | 3.80                          | (3.56 , 4.05) | 5.16                          | (4.94 , 5.39) | 4.57                | (4.32 , 4.81) | 5.69                | (5.55 , 5.83) | 4.56                      | (4.36 , 4.75) | 4.56                      | (4.37 , 4.76) |
| 2008073 | 3.64                          | (3.40 , 3.87) | 4.80                          | (4.59 , 5.02) | 4.37                | (4.13 , 4.61) | 5.68                | (5.55 , 5.81) | 4.47                      | (4.29 , 4.65) | 4.47                      | (4.29 , 4.66) |
| 2008168 | 3.58                          | (3.35 , 3.82) | 4.97                          | (4.75 , 5.18) | 4.34                | (4.10 , 4.58) | 5.49                | (5.36 , 5.62) | 4.34                      | (4.16 , 4.53) | 4.34                      | (4.15 , 4.53) |
| 2008161 | 3.77                          | (3.54 , 4.01) | 5.40                          | (5.19 , 5.61) | 4.42                | (4.18 , 4.65) | 5.70                | (5.57 , 5.84) | 4.51                      | (4.32 , 4.69) | 4.51                      | (4.33 , 4.70) |
| 2008290 | 3.64                          | (3.39 , 3.88) | 4.82                          | (4.59 , 5.05) | 4.26                | (4.02 , 4.50) | 5.47                | (5.33 , 5.61) | 4.36                      | (4.17 , 4.56) | 4.36                      | (4.17 , 4.56) |
| 2008208 | 3.62                          | (3.38 , 3.86) | 5.02                          | (4.80 , 5.23) | 4.29                | (4.05 , 4.53) | 5.70                | (5.57 , 5.83) | 4.32                      | (4.14 , 4.50) | 4.31                      | (4.13 , 4.50) |
| 2008251 | 3.53                          | (3.30 , 3.77) | 4.97                          | (4.76 , 5.19) | 4.16                | (3.92 , 4.40) | 5.55                | (5.42 , 5.68) | 4.26                      | (4.08 , 4.44) | 4.25                      | (4.07 , 4.43) |
| 2008052 | 4.04                          | (3.80 , 4.28) | 5.27                          | (5.05 , 5.48) | 4.54                | (4.30 , 4.78) | 5.77                | (5.64 , 5.91) | 4.56                      | (4.37 , 4.75) | 4.57                      | (4.38 , 4.76) |

| Family  | height<br>(at flower initiation) |               | height<br>(at flower initiation) |               | height<br>(mid-season) |               | height<br>(mid-season) |               | height<br>(at cone maturity) |               | height<br>(at cone maturity) |               |
|---------|----------------------------------|---------------|----------------------------------|---------------|------------------------|---------------|------------------------|---------------|------------------------------|---------------|------------------------------|---------------|
|         | 13 months                        |               | 25 months                        |               | 14 months              |               | 26 months              |               | 16 months                    |               | 28 months                    |               |
|         |                                  |               |                                  |               |                        |               |                        |               |                              |               |                              |               |
| 2008037 | 3.80                             | (3.56 , 4.04) | 4.84                             | (4.62 , 5.05) | 4.48                   | (4.24 , 4.73) | 5.76                   | (5.62 , 5.89) | 4.69                         | (4.50 , 4.88) | 4.71                         | (4.52 , 4.90) |
| 2008154 | 3.55                             | (3.31 , 3.78) | 4.88                             | (4.66 , 5.09) | 4.10                   | (3.86 , 4.34) | 5.50                   | (5.37 , 5.63) | 4.13                         | (3.95 , 4.31) | 4.11                         | (3.93 , 4.30) |
| 2008136 | 3.52                             | (3.29 , 3.76) | 4.90                             | (4.69 , 5.11) | 4.17                   | (3.93 , 4.41) | 5.44                   | (5.31 , 5.57) | 4.35                         | (4.16 , 4.53) | 4.34                         | (4.15 , 4.52) |
| 2008096 | 3.65                             | (3.41 , 3.88) | 4.94                             | (4.73 , 5.15) | 4.43                   | (4.19 , 4.67) | 5.45                   | (5.32 , 5.58) | 4.27                         | (4.09 , 4.45) | 4.26                         | (4.08 , 4.45) |
| 2008071 | 3.84                             | (3.61 , 4.08) | 4.76                             | (4.54 , 4.97) | 4.56                   | (4.32 , 4.81) | 5.69                   | (5.56 , 5.83) | 4.59                         | (4.41 , 4.77) | 4.60                         | (4.42 , 4.78) |
| 2008124 | 3.76                             | (3.53 , 4.00) | 5.40                             | (5.19 , 5.61) | 4.46                   | (4.22 , 4.70) | 5.76                   | (5.63 , 5.89) | 4.55                         | (4.37 , 4.74) | 4.56                         | (4.38 , 4.75) |
| 2008145 | 3.63                             | (3.39 , 3.86) | 5.13                             | (4.92 , 5.34) | 4.26                   | (4.02 , 4.51) | 5.59                   | (5.46 , 5.72) | 4.59                         | (4.41 , 4.77) | 4.60                         | (4.42 , 4.79) |
| 2008084 | 3.82                             | (3.59 , 4.06) | 4.88                             | (4.67 , 5.09) | 4.57                   | (4.34 , 4.81) | 5.66                   | (5.52 , 5.79) | 4.77                         | (4.58 , 4.95) | 4.79                         | (4.60 , 4.97) |
| 2008083 | 3.62                             | (3.39 , 3.86) | 5.32                             | (5.11 , 5.54) | 4.45                   | (4.21 , 4.68) | 5.67                   | (5.54 , 5.80) | 4.38                         | (4.20 , 4.57) | 4.38                         | (4.20 , 4.56) |
| 2008056 | 3.73                             | (3.49 , 3.96) | 5.24                             | (5.03 , 5.46) | 4.46                   | (4.23 , 4.70) | 5.85                   | (5.72 , 5.98) | 4.68                         | (4.50 , 4.87) | 4.70                         | (4.52 , 4.89) |
| 2008261 | 3.84                             | (3.61 , 4.08) | 5.09                             | (4.88 , 5.31) | 4.56                   | (4.32 , 4.79) | 5.65                   | (5.52 , 5.78) | 4.73                         | (4.55 , 4.92) | 4.76                         | (4.57 , 4.94) |
| 2008157 | 4.07                             | (3.84 , 4.31) | 5.54                             | (5.32 , 5.75) | 4.54                   | (4.30 , 4.78) | 5.71                   | (5.58 , 5.84) | 4.61                         | (4.42 , 4.79) | 4.62                         | (4.44 , 4.80) |
| 2008006 | 3.60                             | (3.37 , 3.84) | 4.92                             | (4.71 , 5.14) | 4.30                   | (4.06 , 4.55) | 5.62                   | (5.49 , 5.75) | 4.14                         | (3.96 , 4.33) | 4.13                         | (3.94 , 4.31) |
| 2008240 | 3.84                             | (3.60 , 4.07) | 5.28                             | (5.07 , 5.50) | 4.36                   | (4.13 , 4.60) | 5.62                   | (5.49 , 5.75) | 4.47                         | (4.29 , 4.65) | 4.47                         | (4.29 , 4.66) |
| 2008103 | 3.16                             | (2.92 , 3.39) | 4.86                             | (4.65 , 5.07) | 3.88                   | (3.65 , 4.12) | 5.42                   | (5.29 , 5.55) | 3.92                         | (3.73 , 4.10) | 3.88                         | (3.70 , 4.06) |
| 2008148 | 3.56                             | (3.33 , 3.80) | 5.05                             | (4.83 , 5.26) | 4.23                   | (3.98 , 4.48) | 5.69                   | (5.56 , 5.83) | 4.38                         | (4.20 , 4.57) | 4.38                         | (4.19 , 4.56) |
| 2008236 | 4.00                             | (3.77 , 4.24) | 5.47                             | (5.26 , 5.68) | 4.65                   | (4.41 , 4.89) | 5.65                   | (5.52 , 5.79) | 4.73                         | (4.54 , 4.91) | 4.74                         | (4.56 , 4.93) |
| 2008259 | 3.68                             | (3.45 , 3.92) | 5.02                             | (4.81 , 5.23) | 4.43                   | (4.20 , 4.67) | 5.49                   | (5.36 , 5.62) | 4.36                         | (4.18 , 4.54) | 4.36                         | (4.17 , 4.54) |
| 2008191 | 3.57                             | (3.33 , 3.81) | 5.13                             | (4.91 , 5.35) | 4.33                   | (4.09 , 4.57) | 5.69                   | (5.56 , 5.83) | 4.43                         | (4.24 , 4.62) | 4.42                         | (4.24 , 4.61) |
| 2008242 | 3.79                             | (3.55 , 4.03) | 5.41                             | (5.19 , 5.62) | 4.43                   | (4.18 , 4.69) | 5.65                   | (5.51 , 5.78) | 4.46                         | (4.28 , 4.65) | 4.47                         | (4.28 , 4.65) |
| 2008248 | 3.67                             | (3.43 , 3.91) | 5.19                             | (4.97 , 5.41) | 4.44                   | (4.20 , 4.69) | 5.75                   | (5.62 , 5.89) | 4.61                         | (4.42 , 4.80) | 4.62                         | (4.43 , 4.81) |
| 2008010 | 3.35                             | (3.12 , 3.59) | 5.00                             | (4.79 , 5.21) | 4.19                   | (3.96 , 4.43) | 5.65                   | (5.52 , 5.78) | 4.44                         | (4.26 , 4.62) | 4.43                         | (4.25 , 4.62) |
| 2008263 | 3.49                             | (3.25 , 3.72) | 4.65                             | (4.43 , 4.86) | 4.32                   | (4.09 , 4.56) | 5.50                   | (5.37 , 5.63) | 4.13                         | (3.94 , 4.31) | 4.10                         | (3.92 , 4.29) |
| 2008153 | 3.72                             | (3.48 , 3.95) | 5.20                             | (4.99 , 5.41) | 4.50                   | (4.26 , 4.74) | 5.65                   | (5.52 , 5.79) | 4.48                         | (4.30 , 4.67) | 4.49                         | (4.30 , 4.67) |
| 2008119 | 3.59                             | (3.35 , 3.82) | 4.90                             | (4.69 , 5.12) | 4.35                   | (4.11 , 4.60) | 5.55                   | (5.41 , 5.68) | 4.52                         | (4.34 , 4.70) | 4.73                         | (4.54 , 4.92) |
| 2008206 | 3.54                             | (3.30 , 3.77) | 5.39                             | (5.18 , 5.60) | 4.34                   | (4.10 , 4.57) | 5.70                   | (5.57 , 5.83) | 4.26                         | (4.08 , 4.44) | 4.24                         | (4.06 , 4.43) |
| 2008139 | 3.55                             | (3.31 , 3.78) | 5.24                             | (5.03 , 5.45) | 4.45                   | (4.21 , 4.70) | 5.66                   | (5.53 , 5.79) | 4.44                         | (4.26 , 4.62) | 4.43                         | (4.25 , 4.62) |
| 2008106 | 3.52                             | (3.28 , 3.75) | 5.12                             | (4.90 , 5.33) | 4.45                   | (4.21 , 4.68) | 5.53                   | (5.40 , 5.66) | 4.44                         | (4.25 , 4.62) | 4.44                         | (4.25 , 4.62) |
| 2008122 | 3.45                             | (3.21 , 3.69) | 5.18                             | (4.97 , 5.40) | 4.20                   | (3.96 , 4.44) | 5.44                   | (5.31 , 5.58) | 4.22                         | (4.03 , 4.41) | 4.21                         | (4.02 , 4.40) |
| 2008155 | 3.74                             | (3.50 , 3.97) | 5.13                             | (4.92 , 5.34) | 4.33                   | (4.10 , 4.57) | 5.61                   | (5.48 , 5.75) | 4.43                         | (4.25 , 4.62) | 4.43                         | (4.25 , 4.62) |
| 2008088 | 3.47                             | (3.24 , 3.71) | 4.92                             | (4.71 , 5.13) | 4.22                   | (3.98 , 4.45) | 5.49                   | (5.36 , 5.63) | 4.26                         | (4.08 , 4.45) | 4.25                         | (4.07 , 4.44) |
| 2008111 | 3.38                             | (3.15 , 3.62) | 4.61                             | (4.40 , 4.83) | 4.28                   | (4.04 , 4.53) | 5.08                   | (4.95 , 5.21) | 4.19                         | (4.00 , 4.37) | 4.17                         | (3.99 , 4.36) |
| 2008202 | 3.88                             | (3.64 , 4.12) | 5.14                             | (4.92 , 5.36) | 4.55                   | (4.31 , 4.79) | 5.53                   | (5.40 , 5.67) | 4.53                         | (4.35 , 4.72) | 4.54                         | (4.35 , 4.73) |
| 2008013 | 3.76                             | (3.53 , 4.00) | 5.37                             | (5.16 , 5.58) | 4.53                   | (4.29 , 4.76) | 5.66                   | (5.53 , 5.79) | 4.79                         | (4.61 , 4.97) | 4.82                         | (4.64 , 5.00) |
| 2008279 | 3.88                             | (3.64 , 4.11) | 5.23                             | (5.02 , 5.45) | 4.59                   | (4.36 , 4.83) | 5.68                   | (5.55 , 5.81) | 4.68                         | (4.50 , 4.86) | 4.70                         | (4.52 , 4.89) |
| 2008007 | 3.75                             | (3.51 , 3.99) | 4.85                             | (4.64 , 5.06) | 4.19                   | (3.96 , 4.43) | 5.48                   | (5.35 , 5.62) | 4.26                         | (4.07 , 4.44) | 4.25                         | (4.06 , 4.44) |

| Family  | height<br>(at flower initiation) |               | height<br>(at flower initiation) |               | height<br>(mid-season) |               | height<br>(mid-season) |               | height<br>(at cone maturity) |               | height<br>(at cone maturity) |               |
|---------|----------------------------------|---------------|----------------------------------|---------------|------------------------|---------------|------------------------|---------------|------------------------------|---------------|------------------------------|---------------|
|         | 13 months                        |               | 25 months                        |               | 14 months              |               | 26 months              |               | 16 months                    |               | 28 months                    |               |
|         |                                  |               |                                  |               |                        |               |                        |               |                              |               |                              |               |
| 2008090 | 3.36                             | (3.13 , 3.60) | 4.90                             | (4.69 , 5.11) | 4.12                   | (3.88 , 4.36) | 5.56                   | (5.43 , 5.69) | 4.10                         | (3.92 , 4.28) | 4.08                         | (3.89 , 4.26) |
| 2008055 | 3.85                             | (3.62 , 4.09) | 5.38                             | (5.17 , 5.60) | 4.57                   | (4.34 , 4.81) | 5.72                   | (5.59 , 5.86) | 4.62                         | (4.44 , 4.81) | 4.63                         | (4.45 , 4.82) |
| 2008271 | 3.60                             | (3.36 , 3.83) | 5.14                             | (4.93 , 5.35) | 4.37                   | (4.13 , 4.61) | 5.53                   | (5.40 , 5.66) | 4.46                         | (4.27 , 4.64) | 4.46                         | (4.27 , 4.64) |
| 2008035 | 3.65                             | (3.41 , 3.88) | 5.30                             | (5.08 , 5.51) | 4.35                   | (4.11 , 4.58) | 5.73                   | (5.60 , 5.86) | 4.44                         | (4.25 , 4.62) | 4.60                         | (4.41 , 4.79) |
| 2008212 | 3.62                             | (3.39 , 3.86) | 5.03                             | (4.82 , 5.25) | 4.25                   | (4.01 , 4.48) | 5.60                   | (5.47 , 5.73) | 4.41                         | (4.22 , 4.59) | 4.40                         | (4.22 , 4.59) |
| 2008149 | 3.67                             | (3.44 , 3.91) | 5.12                             | (4.90 , 5.33) | 4.33                   | (4.09 , 4.57) | 5.65                   | (5.52 , 5.78) | 4.54                         | (4.35 , 4.72) | 4.54                         | (4.36 , 4.73) |
| 2008170 | 3.87                             | (3.63 , 4.10) | 5.42                             | (5.21 , 5.63) | 4.54                   | (4.30 , 4.77) | 5.73                   | (5.60 , 5.86) | 4.65                         | (4.47 , 4.84) | 4.67                         | (4.48 , 4.85) |
| 2008247 | 3.64                             | (3.40 , 3.87) | 4.86                             | (4.65 , 5.08) | 4.25                   | (4.01 , 4.49) | 5.62                   | (5.49 , 5.75) | 4.25                         | (4.07 , 4.43) | 4.23                         | (4.05 , 4.41) |
| 2008110 | 3.64                             | (3.40 , 3.88) | 5.00                             | (4.78 , 5.22) | 4.33                   | (4.09 , 4.57) | 5.54                   | (5.41 , 5.68) | 4.35                         | (4.15 , 4.54) | 4.35                         | (4.15 , 4.54) |
| 2008043 | 3.65                             | (3.42 , 3.89) | 5.14                             | (4.93 , 5.36) | 4.47                   | (4.24 , 4.71) | 5.70                   | (5.57 , 5.83) | 4.55                         | (4.36 , 4.73) | 4.55                         | (4.37 , 4.74) |
| 2008188 | 3.76                             | (3.53 , 4.00) | 5.40                             | (5.19 , 5.61) | 4.39                   | (4.16 , 4.63) | 5.60                   | (5.47 , 5.74) | 4.55                         | (4.36 , 4.73) | 4.56                         | (4.37 , 4.74) |
| 2008080 | 3.77                             | (3.52 , 4.01) | 5.01                             | (4.78 , 5.23) | 4.47                   | (4.22 , 4.71) | 5.69                   | (5.56 , 5.83) | 4.49                         | (4.29 , 4.69) | 4.50                         | (4.30 , 4.70) |
| 2008239 | 3.50                             | (3.27 , 3.74) | 5.19                             | (4.97 , 5.40) | 4.16                   | (3.92 , 4.40) | 5.77                   | (5.64 , 5.90) | 4.40                         | (4.22 , 4.59) | 4.40                         | (4.22 , 4.59) |
| 2008075 | 3.59                             | (3.36 , 3.83) | 5.27                             | (5.06 , 5.48) | 4.29                   | (4.05 , 4.52) | 5.55                   | (5.42 , 5.68) | 4.45                         | (4.26 , 4.63) | 4.45                         | (4.26 , 4.63) |
| 2008114 | 3.67                             | (3.42 , 3.91) | 5.54                             | (5.31 , 5.76) | 4.43                   | (4.19 , 4.67) | 5.61                   | (5.47 , 5.75) | 4.62                         | (4.43 , 4.82) | 4.64                         | (4.44 , 4.83) |
| 2008166 | 3.69                             | (3.45 , 3.92) | 5.09                             | (4.88 , 5.30) | 4.44                   | (4.20 , 4.68) | 5.73                   | (5.60 , 5.86) | 4.65                         | (4.47 , 4.83) | 4.67                         | (4.48 , 4.85) |
| 2008252 | 3.80                             | (3.56 , 4.03) | 5.36                             | (5.15 , 5.57) | 4.35                   | (4.11 , 4.59) | 5.65                   | (5.52 , 5.78) | 4.54                         | (4.35 , 4.73) | 4.55                         | (4.36 , 4.74) |
| 2008150 | 3.77                             | (3.53 , 4.00) | 5.25                             | (5.04 , 5.46) | 4.35                   | (4.11 , 4.59) | 5.76                   | (5.63 , 5.89) | 4.40                         | (4.22 , 4.58) | 4.40                         | (4.22 , 4.58) |
| 2008009 | 3.76                             | (3.53 , 4.00) | 5.09                             | (4.88 , 5.31) | 4.32                   | (4.09 , 4.56) | 5.52                   | (5.39 , 5.66) | 4.41                         | (4.23 , 4.60) | 4.41                         | (4.23 , 4.60) |
| 2008081 | 3.37                             | (3.13 , 3.62) | 4.73                             | (4.51 , 4.96) | 4.27                   | (4.01 , 4.53) | 5.47                   | (5.34 , 5.61) | 4.18                         | (3.98 , 4.37) | 4.16                         | (3.96 , 4.35) |
| 2008041 | 3.64                             | (3.40 , 3.88) | 4.93                             | (4.72 , 5.14) | 4.31                   | (4.07 , 4.55) | 5.57                   | (5.44 , 5.70) | 4.49                         | (4.31 , 4.67) | 4.49                         | (4.31 , 4.68) |
| 2008061 | 4.14                             | (3.90 , 4.38) | 5.43                             | (5.21 , 5.65) | 4.64                   | (4.40 , 4.88) | 5.75                   | (5.62 , 5.89) | 4.90                         | (4.71 , 5.09) | 4.93                         | (4.74 , 5.12) |
| 2008087 | 3.35                             | (3.12 , 3.59) | 4.66                             | (4.45 , 4.88) | 4.07                   | (3.84 , 4.31) | 5.33                   | (5.20 , 5.46) | 3.85                         | (3.66 , 4.03) | 3.81                         | (3.63 , 4.00) |
| 2008147 | 3.58                             | (3.35 , 3.82) | 4.95                             | (4.74 , 5.17) | 4.49                   | (4.25 , 4.72) | 5.59                   | (5.46 , 5.73) | 4.42                         | (4.24 , 4.60) | 4.42                         | (4.24 , 4.60) |
| 2008258 | 3.55                             | (3.31 , 3.78) | 4.81                             | (4.60 , 5.02) | 4.25                   | (4.01 , 4.49) | 5.60                   | (5.47 , 5.73) | 4.46                         | (4.27 , 4.64) | 4.46                         | (4.27 , 4.64) |
| 2008130 | 3.79                             | (3.55 , 4.03) | 5.07                             | (4.86 , 5.28) | 4.41                   | (4.18 , 4.65) | 5.54                   | (5.41 , 5.67) | 4.38                         | (4.20 , 4.56) | 4.38                         | (4.19 , 4.56) |
| 2008100 | 3.46                             | (3.22 , 3.70) | 4.87                             | (4.65 , 5.09) | 4.24                   | (3.99 , 4.49) | 5.27                   | (5.14 , 5.41) | 4.25                         | (4.06 , 4.44) | 4.24                         | (4.05 , 4.43) |
| 2008132 | 3.53                             | (3.30 , 3.77) | 4.76                             | (4.55 , 4.97) | 4.32                   | (4.09 , 4.56) | 5.43                   | (5.30 , 5.56) | 4.39                         | (4.21 , 4.57) | 4.39                         | (4.21 , 4.58) |
| 2008256 | 3.45                             | (3.21 , 3.68) | 4.69                             | (4.47 , 4.90) | 4.26                   | (4.02 , 4.49) | 5.27                   | (5.14 , 5.40) | 4.24                         | (4.06 , 4.43) | 4.23                         | (4.05 , 4.42) |
| 2008093 | 3.60                             | (3.36 , 3.83) | 5.42                             | (5.20 , 5.63) | 4.31                   | (4.07 , 4.55) | 5.68                   | (5.54 , 5.81) | 4.40                         | (4.22 , 4.58) | 4.40                         | (4.22 , 4.58) |
| 2008108 | 4.04                             | (3.81 , 4.28) | 5.17                             | (4.96 , 5.38) | 4.60                   | (4.36 , 4.83) | 5.70                   | (5.57 , 5.83) | 4.74                         | (4.56 , 4.93) | 4.77                         | (4.59 , 4.95) |
| 2008179 | 3.83                             | (3.59 , 4.06) | 5.27                             | (5.06 , 5.49) | 4.48                   | (4.25 , 4.72) | 5.73                   | (5.59 , 5.86) | 4.57                         | (4.39 , 4.76) | 4.58                         | (4.40 , 4.77) |
| 2008192 | 3.77                             | (3.53 , 4.01) | 5.27                             | (5.05 , 5.49) | 4.41                   | (4.17 , 4.65) | 5.60                   | (5.46 , 5.73) | 4.45                         | (4.27 , 4.64) | 4.45                         | (4.26 , 4.64) |
| 2008089 | 3.34                             | (3.10 , 3.57) | 4.79                             | (4.57 , 5.00) | 4.06                   | (3.83 , 4.30) | 5.54                   | (5.41 , 5.67) | 4.13                         | (3.95 , 4.31) | 4.12                         | (3.93 , 4.30) |
| 2008064 | 3.82                             | (3.58 , 4.05) | 5.43                             | (5.21 , 5.64) | 4.39                   | (4.15 , 4.62) | 5.55                   | (5.42 , 5.68) | 4.56                         | (4.37 , 4.74) | 4.57                         | (4.38 , 4.75) |
| 2008269 | 3.78                             | (3.54 , 4.02) | 5.18                             | (4.96 , 5.39) | 4.46                   | (4.22 , 4.70) | 5.72                   | (5.58 , 5.85) | 4.60                         | (4.41 , 4.79) | 4.62                         | (4.43 , 4.81) |

| Family  | height<br>(at flower initiation) |               | height<br>(at flower initiation) |               | height<br>(mid-season) |               | height<br>(mid-season) |               | height<br>(at cone maturity) |               | height<br>(at cone maturity) |               |
|---------|----------------------------------|---------------|----------------------------------|---------------|------------------------|---------------|------------------------|---------------|------------------------------|---------------|------------------------------|---------------|
|         | 13 months                        |               | 25 months                        |               | 14 months              |               | 26 months              |               | 16 months                    |               | 28 months                    |               |
|         |                                  |               |                                  |               |                        |               |                        |               |                              |               |                              |               |
| 2008059 | 3.76                             | (3.52 , 3.99) | 5.01                             | (4.79 , 5.22) | 4.48                   | (4.25 , 4.72) | 5.62                   | (5.49 , 5.76) | 4.62                         | (4.44 , 4.80) | 4.63                         | (4.45 , 4.82) |
| 2008047 | 4.04                             | (3.80 , 4.27) | 5.32                             | (5.10 , 5.53) | 4.61                   | (4.36 , 4.85) | 5.80                   | (5.67 , 5.94) | 4.68                         | (4.50 , 4.87) | 4.70                         | (4.52 , 4.89) |
| 2008194 | 3.61                             | (3.38 , 3.85) | 5.02                             | (4.81 , 5.23) | 4.18                   | (3.93 , 4.42) | 5.62                   | (5.49 , 5.75) | 4.40                         | (4.22 , 4.58) | 4.40                         | (4.22 , 4.59) |
| 2008232 | 3.67                             | (3.44 , 3.91) | 5.14                             | (4.93 , 5.36) | 4.43                   | (4.19 , 4.68) | 5.68                   | (5.54 , 5.81) | 4.44                         | (4.26 , 4.62) | 4.44                         | (4.26 , 4.62) |
| 2008173 | 3.93                             | (3.69 , 4.16) | 5.45                             | (5.24 , 5.66) | 4.39                   | (4.15 , 4.64) | 5.66                   | (5.53 , 5.79) | 4.62                         | (4.44 , 4.80) | 4.64                         | (4.45 , 4.82) |
| 2008120 | 3.53                             | (3.29 , 3.77) | 5.24                             | (5.02 , 5.46) | 4.15                   | (3.91 , 4.39) | 5.59                   | (5.46 , 5.73) | 4.32                         | (4.13 , 4.51) | 4.32                         | (4.13 , 4.51) |
| 2008262 | 3.57                             | (3.33 , 3.81) | 4.71                             | (4.50 , 4.93) | 4.31                   | (4.07 , 4.55) | 5.53                   | (5.40 , 5.67) | 4.53                         | (4.34 , 4.72) | 4.54                         | (4.35 , 4.73) |
| 2008187 | 3.67                             | (3.44 , 3.91) | 4.98                             | (4.77 , 5.20) | 4.29                   | (4.04 , 4.53) | 5.50                   | (5.37 , 5.63) | 4.16                         | (3.98 , 4.34) | 4.14                         | (3.95 , 4.32) |
| 2008051 | 3.36                             | (3.13 , 3.60) | 4.85                             | (4.64 , 5.07) | 4.07                   | (3.83 , 4.31) | 5.62                   | (5.49 , 5.76) | 4.22                         | (4.03 , 4.41) | 4.21                         | (4.02 , 4.40) |
| 2008198 | 3.41                             | (3.16 , 3.66) | 4.61                             | (4.38 , 4.85) | 4.00                   | (3.76 , 4.25) | 5.20                   | (5.06 , 5.34) | 3.98                         | (3.78 , 4.18) | 3.94                         | (3.74 , 4.14) |
| 2008054 | 3.74                             | (3.51 , 3.98) | 5.06                             | (4.84 , 5.28) | 4.19                   | (3.95 , 4.43) | 5.61                   | (5.48 , 5.74) | 4.18                         | (3.99 , 4.36) | 4.16                         | (3.98 , 4.34) |
| 2008244 | 4.01                             | (3.77 , 4.24) | 5.45                             | (5.24 , 5.66) | 4.55                   | (4.31 , 4.79) | 5.78                   | (5.65 , 5.91) | 4.63                         | (4.44 , 4.81) | 4.64                         | (4.46 , 4.82) |
| 2008177 | 3.94                             | (3.70 , 4.18) | 5.37                             | (5.16 , 5.58) | 4.50                   | (4.24 , 4.75) | 5.80                   | (5.67 , 5.94) | 4.58                         | (4.40 , 4.76) | 4.59                         | (4.41 , 4.77) |
| 2008117 | 3.73                             | (3.49 , 3.97) | 5.13                             | (4.92 , 5.34) | 4.26                   | (4.02 , 4.51) | 5.52                   | (5.38 , 5.65) | 4.48                         | (4.30 , 4.67) | 4.49                         | (4.30 , 4.67) |
| 2008016 | 3.94                             | (3.71 , 4.18) | 5.39                             | (5.18 , 5.60) | 4.64                   | (4.40 , 4.89) | 5.65                   | (5.52 , 5.78) | 4.67                         | (4.49 , 4.86) | 4.69                         | (4.51 , 4.87) |
| 2008267 | 3.80                             | (3.56 , 4.04) | 5.49                             | (5.27 , 5.70) | 4.57                   | (4.32 , 4.81) | 5.70                   | (5.56 , 5.83) | 4.59                         | (4.40 , 4.78) | 4.60                         | (4.41 , 4.79) |
| 2008040 | 3.41                             | (3.18 , 3.65) | 4.93                             | (4.72 , 5.15) | 4.07                   | (3.83 , 4.31) | 5.48                   | (5.35 , 5.61) | 4.27                         | (4.08 , 4.46) | 4.25                         | (4.07 , 4.44) |
| 2008218 | 3.63                             | (3.40 , 3.87) | 5.16                             | (4.95 , 5.38) | 4.37                   | (4.14 , 4.61) | 5.73                   | (5.60 , 5.86) | 4.37                         | (4.19 , 4.55) | 4.36                         | (4.18 , 4.55) |
| 2008070 | 3.70                             | (3.46 , 3.93) | 5.04                             | (4.83 , 5.26) | 4.39                   | (4.15 , 4.64) | 5.72                   | (5.59 , 5.85) | 4.54                         | (4.35 , 4.72) | 4.55                         | (4.36 , 4.73) |
| 2008102 | 3.36                             | (3.12 , 3.60) | 4.75                             | (4.53 , 4.98) | 4.13                   | (3.88 , 4.38) | 5.51                   | (5.37 , 5.65) | 4.05                         | (3.86 , 4.24) | 4.03                         | (3.84 , 4.21) |
| 2008078 | 3.52                             | (3.28 , 3.75) | 4.69                             | (4.47 , 4.90) | 4.29                   | (4.05 , 4.52) | 5.56                   | (5.43 , 5.69) | 4.32                         | (4.14 , 4.51) | 4.32                         | (4.14 , 4.50) |
| 2008074 | 3.52                             | (3.28 , 3.76) | 5.25                             | (5.03 , 5.47) | 4.20                   | (3.95 , 4.45) | 5.72                   | (5.58 , 5.85) | 4.45                         | (4.27 , 4.64) | 4.46                         | (4.27 , 4.64) |

c.

| Family  | lateral length |                 | lateral length |                 | number of nodes on lateral |               | number of nodes on lateral |               | internode length |                 | internode length |                 |
|---------|----------------|-----------------|----------------|-----------------|----------------------------|---------------|----------------------------|---------------|------------------|-----------------|------------------|-----------------|
|         | 16 months *    |                 | 28 months *    |                 | 16 months *                |               | 28 months *                |               | 16 months *      |                 | 28 months *      |                 |
|         |                |                 |                |                 |                            |               |                            |               |                  |                 |                  |                 |
| 2008003 | 43.18          | (38.64 , 47.98) | 38.57          | (33.70 , 43.77) | 6.43                       | (5.91 , 6.98) | 6.42                       | (5.90 , 6.96) | 15.41            | (14.08 , 16.79) | 22.56            | (20.40 , 24.83) |
| 2008190 | 42.65          | (38.14 , 47.42) | 35.04          | (30.41 , 40.00) | 5.55                       | (5.07 , 6.06) | 5.57                       | (5.09 , 6.07) | 17.60            | (16.19 , 19.07) | 22.56            | (20.40 , 24.83) |
| 2008209 | 41.69          | (36.97 , 46.68) | 35.65          | (30.85 , 40.79) | 5.94                       | (5.41 , 6.49) | 5.94                       | (5.42 , 6.49) | 15.67            | (14.24 , 17.17) | 22.56            | (20.40 , 24.83) |
| 2008151 | 47.61          | (42.83 , 52.64) | 39.59          | (34.59 , 44.91) | 5.89                       | (5.39 , 6.42) | 5.90                       | (5.41 , 6.42) | 18.41            | (16.74 , 20.16) | 22.56            | (20.40 , 24.83) |
| 2008039 | 45.53          | (40.86 , 50.45) | 47.60          | (42.17 , 53.36) | 6.39                       | (5.86 , 6.94) | 6.39                       | (5.86 , 6.93) | 17.30            | (15.90 , 18.77) | 22.56            | (20.40 , 24.83) |

| Family  | lateral length |                 | lateral length |                 | number of nodes on lateral |               | number of nodes on lateral |               | internode length |                 | internode length |                 |
|---------|----------------|-----------------|----------------|-----------------|----------------------------|---------------|----------------------------|---------------|------------------|-----------------|------------------|-----------------|
|         | 16 months *    |                 | 28 months *    |                 | 16 months *                |               | 28 months *                |               | 16 months *      |                 | 28 months *      |                 |
| 2008152 | 47.20          | (42.43 , 52.21) | 42.21          | (37.11 , 47.64) | 5.98                       | (5.48 , 6.51) | 5.99                       | (5.49 , 6.51) | 17.88            | (16.45 , 19.37) | 22.56            | (20.40 , 24.83) |
| 2008001 | 39.52          | (35.02 , 44.29) | 33.27          | (28.65 , 38.23) | 5.41                       | (4.91 , 5.93) | 5.43                       | (4.94 , 5.94) | 18.48            | (16.94 , 20.10) | 22.56            | (20.40 , 24.83) |
| 2008073 | 46.44          | (41.73 , 51.41) | 40.86          | (35.85 , 46.20) | 6.73                       | (6.20 , 7.29) | 6.72                       | (6.19 , 7.27) | 19.24            | (17.53 , 21.03) | 22.56            | (20.40 , 24.83) |
| 2008168 | 42.44          | (37.94 , 47.20) | 37.71          | (32.76 , 43.01) | 6.16                       | (5.65 , 6.70) | 6.17                       | (5.66 , 6.69) | 17.96            | (16.69 , 19.29) | 22.56            | (20.40 , 24.83) |
| 2008161 | 44.27          | (39.67 , 49.13) | 38.26          | (33.42 , 43.42) | 6.06                       | (5.55 , 6.59) | 6.07                       | (5.56 , 6.59) | 17.95            | (16.51 , 19.45) | 22.56            | (20.40 , 24.83) |
| 2008290 | 41.10          | (36.51 , 45.96) | 34.88          | (30.14 , 39.98) | 5.83                       | (5.31 , 6.37) | 5.84                       | (5.33 , 6.37) | 16.69            | (15.10 , 18.36) | 22.56            | (20.40 , 24.83) |
| 2008208 | 44.52          | (39.91 , 49.40) | 37.67          | (32.87 , 42.80) | 5.82                       | (5.32 , 6.34) | 5.83                       | (5.34 , 6.34) | 16.47            | (15.10 , 17.90) | 22.56            | (20.40 , 24.83) |
| 2008251 | 39.91          | (35.47 , 44.62) | 32.89          | (28.35 , 37.75) | 5.76                       | (5.26 , 6.29) | 5.78                       | (5.28 , 6.30) | 17.61            | (15.83 , 19.49) | 22.56            | (20.40 , 24.83) |
| 2008052 | 45.01          | (40.29 , 50.00) | 37.74          | (32.78 , 43.05) | 6.06                       | (5.55 , 6.60) | 6.07                       | (5.56 , 6.60) | 20.78            | (19.24 , 22.37) | 22.56            | (20.40 , 24.83) |
| 2008037 | 45.77          | (41.00 , 50.79) | 39.61          | (34.60 , 44.96) | 6.13                       | (5.61 , 6.67) | 6.13                       | (5.62 , 6.67) | 18.45            | (16.78 , 20.21) | 22.56            | (20.40 , 24.83) |
| 2008154 | 44.73          | (40.10 , 49.61) | 39.11          | (34.21 , 44.34) | 5.96                       | (5.46 , 6.49) | 5.97                       | (5.47 , 6.49) | 15.81            | (14.27 , 17.44) | 22.56            | (20.40 , 24.83) |
| 2008136 | 45.17          | (40.43 , 50.17) | 36.52          | (31.66 , 41.73) | 5.83                       | (5.32 , 6.36) | 5.84                       | (5.34 , 6.36) | 13.89            | (12.70 , 15.12) | 22.56            | (20.40 , 24.83) |
| 2008096 | 42.06          | (37.58 , 46.80) | 37.32          | (32.55 , 42.41) | 5.88                       | (5.38 , 6.40) | 5.89                       | (5.39 , 6.40) | 14.93            | (13.63 , 16.29) | 22.56            | (20.40 , 24.83) |
| 2008071 | 45.61          | (40.92 , 50.55) | 37.05          | (32.21 , 42.23) | 5.77                       | (5.28 , 6.29) | 5.78                       | (5.29 , 6.30) | 19.49            | (17.76 , 21.29) | 22.56            | (20.40 , 24.83) |
| 2008124 | 50.90          | (45.96 , 56.09) | 43.91          | (38.70 , 49.44) | 6.32                       | (5.80 , 6.86) | 6.32                       | (5.80 , 6.85) | 19.71            | (17.98 , 21.53) | 22.56            | (20.40 , 24.83) |
| 2008145 | 44.37          | (39.75 , 49.24) | 38.45          | (33.59 , 43.65) | 5.97                       | (5.46 , 6.49) | 5.97                       | (5.47 , 6.50) | 18.63            | (17.16 , 20.16) | 22.56            | (20.40 , 24.83) |
| 2008084 | 43.41          | (38.85 , 48.21) | 37.45          | (32.49 , 42.77) | 6.15                       | (5.63 , 6.68) | 6.15                       | (5.64 , 6.68) | 16.01            | (14.65 , 17.43) | 22.56            | (20.40 , 24.83) |
| 2008083 | 44.62          | (40.00 , 49.49) | 38.13          | (33.31 , 43.28) | 6.33                       | (5.81 , 6.87) | 6.33                       | (5.81 , 6.86) | 16.20            | (14.84 , 17.61) | 22.56            | (20.40 , 24.83) |
| 2008056 | 48.87          | (44.04 , 53.96) | 40.93          | (35.93 , 46.26) | 7.11                       | (6.56 , 7.68) | 7.09                       | (6.54 , 7.65) | 19.30            | (17.82 , 20.84) | 22.56            | (20.40 , 24.83) |
| 2008261 | 47.59          | (42.81 , 52.61) | 40.62          | (35.63 , 45.93) | 6.04                       | (5.53 , 6.57) | 6.04                       | (5.54 , 6.56) | 17.60            | (16.34 , 18.91) | 22.56            | (20.40 , 24.83) |
| 2008157 | 49.31          | (44.45 , 54.43) | 43.31          | (38.17 , 48.77) | 6.12                       | (5.61 , 6.65) | 6.12                       | (5.62 , 6.65) | 16.96            | (15.35 , 18.64) | 22.56            | (20.40 , 24.83) |
| 2008006 | 37.71          | (33.31 , 42.37) | 31.99          | (27.46 , 36.87) | 5.53                       | (5.03 , 6.05) | 5.55                       | (5.05 , 6.06) | 17.21            | (15.59 , 18.90) | 22.56            | (20.40 , 24.83) |
| 2008240 | 47.24          | (42.48 , 52.25) | 41.20          | (36.17 , 46.56) | 6.92                       | (6.37 , 7.48) | 6.90                       | (6.36 , 7.46) | 14.92            | (13.42 , 16.50) | 22.56            | (20.40 , 24.83) |
| 2008103 | 36.81          | (32.46 , 41.42) | 32.13          | (27.56 , 37.04) | 5.61                       | (5.11 , 6.14) | 5.63                       | (5.13 , 6.15) | 15.37            | (14.05 , 16.75) | 22.56            | (20.40 , 24.83) |
| 2008148 | 41.28          | (36.83 , 45.98) | 36.04          | (31.34 , 41.06) | 5.80                       | (5.30 , 6.32) | 5.81                       | (5.32 , 6.33) | 15.37            | (13.84 , 16.98) | 22.56            | (20.40 , 24.83) |
| 2008236 | 49.00          | (44.15 , 54.10) | 40.65          | (35.64 , 45.99) | 6.59                       | (6.06 , 7.14) | 6.58                       | (6.06 , 7.13) | 17.49            | (16.07 , 18.96) | 22.56            | (20.40 , 24.83) |
| 2008259 | 43.98          | (39.32 , 48.90) | 39.81          | (34.80 , 45.16) | 5.89                       | (5.38 , 6.42) | 5.90                       | (5.40 , 6.42) | 16.73            | (15.50 , 18.01) | 22.56            | (20.40 , 24.83) |
| 2008191 | 45.48          | (40.72 , 50.50) | 41.44          | (36.32 , 46.91) | 5.97                       | (5.46 , 6.51) | 5.98                       | (5.47 , 6.51) | 16.63            | (15.39 , 17.92) | 22.56            | (20.40 , 24.83) |
| 2008242 | 43.02          | (38.39 , 47.92) | 35.83          | (31.08 , 40.92) | 6.20                       | (5.68 , 6.75) | 6.20                       | (5.69 , 6.74) | 16.16            | (14.59 , 17.81) | 22.56            | (20.40 , 24.83) |
| 2008248 | 44.44          | (39.74 , 49.39) | 38.16          | (33.25 , 43.42) | 6.18                       | (5.66 , 6.73) | 6.18                       | (5.67 , 6.72) | 16.83            | (15.45 , 18.27) | 22.56            | (20.40 , 24.83) |
| 2008010 | 45.81          | (41.13 , 50.75) | 39.65          | (34.72 , 44.90) | 6.39                       | (5.87 , 6.94) | 6.39                       | (5.87 , 6.93) | 16.48            | (14.90 , 18.15) | 22.56            | (20.40 , 24.83) |
| 2008263 | 45.54          | (40.87 , 50.46) | 40.06          | (35.10 , 45.35) | 6.41                       | (5.89 , 6.96) | 6.41                       | (5.89 , 6.95) | 18.09            | (16.66 , 19.59) | 22.56            | (20.40 , 24.83) |
| 2008153 | 43.95          | (39.36 , 48.80) | 37.29          | (32.51 , 42.41) | 6.12                       | (5.61 , 6.65) | 6.12                       | (5.61 , 6.65) | 16.41            | (15.04 , 17.85) | 22.56            | (20.40 , 24.83) |
| 2008119 | 44.96          | (40.32 , 49.86) | 38.80          | (33.85 , 44.09) | 6.01                       | (5.50 , 6.54) | 6.01                       | (5.51 , 6.54) | 16.10            | (14.74 , 17.52) | 22.56            | (20.40 , 24.83) |
| 2008206 | 41.40          | (36.95 , 46.11) | 37.55          | (32.75 , 42.68) | 6.06                       | (5.55 , 6.59) | 6.06                       | (5.56 , 6.59) | 17.09            | (15.48 , 18.79) | 22.56            | (20.40 , 24.83) |
| 2008139 | 43.74          | (39.07 , 48.66) | 37.24          | (32.40 , 42.42) | 6.02                       | (5.51 , 6.56) | 6.03                       | (5.52 , 6.56) | 17.90            | (16.25 , 19.63) | 22.56            | (20.40 , 24.83) |



| Family  | lateral length |                 | lateral length |                 | number of nodes on lateral |               | number of nodes on lateral |               | internode length |                 | internode length |                 |
|---------|----------------|-----------------|----------------|-----------------|----------------------------|---------------|----------------------------|---------------|------------------|-----------------|------------------|-----------------|
|         | 16 months *    |                 | 28 months *    |                 | 16 months *                |               | 28 months *                |               | 16 months *      |                 | 28 months *      |                 |
|         |                |                 |                |                 |                            |               |                            |               |                  |                 |                  |                 |
| 2008106 | 43.96          | (39.37 , 48.80) | 37.68          | (32.89 , 42.81) | 5.98                       | (5.48 , 6.51) | 5.99                       | (5.49 , 6.51) | 18.06            | (16.63 , 19.55) | 22.56            | (20.40 , 24.83) |
| 2008122 | 40.53          | (35.97 , 45.36) | 34.81          | (30.07 , 39.90) | 6.13                       | (5.60 , 6.68) | 6.13                       | (5.61 , 6.68) | 15.52            | (13.99 , 17.13) | 22.56            | (20.40 , 24.83) |
| 2008155 | 44.54          | (39.92 , 49.41) | 39.05          | (34.16 , 44.26) | 6.19                       | (5.67 , 6.72) | 6.19                       | (5.68 , 6.72) | 16.49            | (15.12 , 17.92) | 22.56            | (20.40 , 24.83) |
| 2008088 | 41.00          | (36.49 , 45.77) | 35.14          | (30.38 , 40.25) | 5.74                       | (5.23 , 6.26) | 5.75                       | (5.25 , 6.27) | 15.41            | (13.74 , 17.18) | 22.56            | (20.40 , 24.83) |
| 2008111 | 41.25          | (36.82 , 45.94) | 36.27          | (31.42 , 41.47) | 5.83                       | (5.34 , 6.35) | 5.84                       | (5.35 , 6.36) | 15.98            | (14.64 , 17.38) | 22.56            | (20.40 , 24.83) |
| 2008202 | 46.69          | (41.88 , 51.77) | 40.23          | (35.19 , 45.60) | 6.50                       | (5.96 , 7.05) | 6.49                       | (5.96 , 7.04) | 16.67            | (15.09 , 18.34) | 22.56            | (20.40 , 24.83) |
| 2008013 | 49.25          | (44.39 , 54.36) | 43.68          | (38.51 , 49.18) | 6.34                       | (5.82 , 6.88) | 6.33                       | (5.82 , 6.87) | 18.37            | (17.08 , 19.71) | 22.56            | (20.40 , 24.83) |
| 2008279 | 44.75          | (40.13 , 49.63) | 39.27          | (34.37 , 44.50) | 5.98                       | (5.47 , 6.50) | 5.98                       | (5.48 , 6.50) | 19.10            | (17.40 , 20.88) | 22.56            | (20.40 , 24.83) |
| 2008007 | 52.02          | (46.83 , 57.48) | 44.75          | (39.34 , 50.50) | 6.48                       | (5.94 , 7.04) | 6.47                       | (5.93 , 7.03) | 17.00            | (15.40 , 18.68) | 22.56            | (20.40 , 24.83) |
| 2008090 | 42.79          | (38.18 , 47.67) | 36.77          | (31.96 , 41.92) | 6.27                       | (5.75 , 6.82) | 6.27                       | (5.75 , 6.82) | 16.66            | (15.08 , 18.33) | 22.56            | (20.40 , 24.83) |
| 2008055 | 47.09          | (42.33 , 52.10) | 38.91          | (33.96 , 44.19) | 6.57                       | (6.04 , 7.13) | 6.56                       | (6.04 , 7.11) | 16.66            | (15.07 , 18.32) | 22.56            | (20.40 , 24.83) |
| 2008271 | 45.48          | (40.81 , 50.41) | 38.13          | (33.23 , 43.36) | 6.27                       | (5.75 , 6.81) | 6.27                       | (5.76 , 6.80) | 17.90            | (16.25 , 19.64) | 22.56            | (20.40 , 24.83) |
| 2008035 | 44.68          | (39.97 , 49.64) | 40.60          | (35.54 , 46.00) | 5.89                       | (5.38 , 6.42) | 5.89                       | (5.39 , 6.42) | 16.90            | (15.51 , 18.35) | 22.56            | (20.40 , 24.83) |
| 2008212 | 45.09          | (40.45 , 49.99) | 38.92          | (34.04 , 44.13) | 6.35                       | (5.83 , 6.89) | 6.35                       | (5.83 , 6.88) | 17.56            | (15.93 , 19.28) | 22.56            | (20.40 , 24.83) |
| 2008149 | 42.83          | (38.31 , 47.61) | 36.11          | (31.41 , 41.13) | 6.06                       | (5.55 , 6.59) | 6.06                       | (5.56 , 6.58) | 17.12            | (15.15 , 19.21) | 22.56            | (20.40 , 24.83) |
| 2008170 | 48.87          | (44.03 , 53.97) | 41.92          | (36.85 , 47.32) | 6.27                       | (5.75 , 6.81) | 6.27                       | (5.75 , 6.80) | 17.12            | (15.15 , 19.21) | 22.56            | (20.40 , 24.83) |
| 2008247 | 39.06          | (34.74 , 43.63) | 32.53          | (28.02 , 37.38) | 5.63                       | (5.14 , 6.14) | 5.64                       | (5.16 , 6.15) | 17.12            | (15.15 , 19.21) | 22.56            | (20.40 , 24.83) |
| 2008110 | 37.49          | (33.11 , 42.15) | 32.22          | (27.66 , 37.12) | 5.57                       | (5.06 , 6.10) | 5.67                       | (5.16 , 6.19) | 15.16            | (13.64 , 16.75) | 22.56            | (20.40 , 24.83) |
| 2008043 | 45.44          | (40.68 , 50.46) | 39.85          | (34.84 , 45.20) | 6.17                       | (5.65 , 6.72) | 6.17                       | (5.66 , 6.71) | 17.12            | (15.15 , 19.21) | 22.56            | (20.40 , 24.83) |
| 2008188 | 43.19          | (38.64 , 47.98) | 36.28          | (31.52 , 41.38) | 6.55                       | (6.02 , 7.10) | 6.54                       | (6.02 , 7.09) | 17.37            | (15.75 , 19.08) | 22.56            | (20.40 , 24.83) |
| 2008080 | 45.10          | (40.29 , 50.18) | 38.14          | (33.19 , 43.44) | 6.12                       | (5.59 , 6.67) | 6.12                       | (5.60 , 6.66) | 17.42            | (15.65 , 19.29) | 22.56            | (20.40 , 24.83) |
| 2008239 | 43.64          | (38.90 , 48.65) | 38.58          | (33.59 , 43.91) | 6.21                       | (5.67 , 6.76) | 6.21                       | (5.68 , 6.75) | 17.12            | (15.15 , 19.21) | 22.56            | (20.40 , 24.83) |
| 2008075 | 45.03          | (40.38 , 49.93) | 39.53          | (34.60 , 44.78) | 6.20                       | (5.69 , 6.74) | 6.20                       | (5.69 , 6.74) | 17.12            | (15.15 , 19.21) | 22.56            | (20.40 , 24.83) |
| 2008114 | 41.47          | (36.85 , 46.36) | 35.90          | (31.08 , 41.06) | 5.95                       | (5.43 , 6.49) | 5.95                       | (5.44 , 6.49) | 17.12            | (15.15 , 19.21) | 22.56            | (20.40 , 24.83) |
| 2008166 | 45.54          | (40.87 , 50.46) | 38.58          | (33.71 , 43.78) | 6.37                       | (5.85 , 6.92) | 6.37                       | (5.86 , 6.91) | 17.12            | (15.15 , 19.21) | 22.56            | (20.40 , 24.83) |
| 2008252 | 45.87          | (41.18 , 50.82) | 39.46          | (34.54 , 44.70) | 6.19                       | (5.67 , 6.72) | 6.19                       | (5.68 , 6.72) | 17.12            | (15.15 , 19.21) | 22.56            | (20.40 , 24.83) |
| 2008150 | 45.34          | (40.68 , 50.26) | 39.25          | (34.35 , 44.48) | 6.18                       | (5.66 , 6.71) | 6.18                       | (5.67 , 6.71) | 17.12            | (15.15 , 19.21) | 22.56            | (20.40 , 24.83) |
| 2008009 | 41.42          | (36.96 , 46.12) | 35.53          | (30.88 , 40.51) | 5.95                       | (5.45 , 6.48) | 5.96                       | (5.46 , 6.48) | 17.12            | (15.15 , 19.21) | 22.56            | (20.40 , 24.83) |
| 2008081 | 44.80          | (40.00 , 49.87) | 39.04          | (33.93 , 44.51) | 6.15                       | (5.62 , 6.70) | 6.15                       | (5.63 , 6.69) | 17.09            | (15.48 , 18.79) | 22.56            | (20.40 , 24.83) |
| 2008041 | 42.81          | (38.29 , 47.60) | 36.95          | (32.17 , 42.05) | 6.00                       | (5.49 , 6.53) | 6.01                       | (5.51 , 6.53) | 17.32            | (15.70 , 19.02) | 22.56            | (20.40 , 24.83) |
| 2008061 | 50.19          | (45.20 , 55.45) | 43.53          | (38.29 , 49.11) | 6.68                       | (6.14 , 7.24) | 6.66                       | (6.13 , 7.22) | 17.69            | (16.26 , 19.18) | 22.56            | (20.40 , 24.83) |
| 2008087 | 36.18          | (31.80 , 40.84) | 31.63          | (26.96 , 36.68) | 5.29                       | (4.80 , 5.81) | 5.31                       | (4.82 , 5.83) | 15.44            | (13.91 , 17.05) | 22.56            | (20.40 , 24.83) |
| 2008147 | 48.46          | (43.54 , 53.64) | 40.04          | (34.94 , 45.50) | 6.49                       | (5.95 , 7.04) | 6.48                       | (5.95 , 7.03) | 17.12            | (15.15 , 19.21) | 22.56            | (20.40 , 24.83) |
| 2008258 | 43.12          | (38.58 , 47.92) | 33.62          | (29.10 , 38.47) | 6.10                       | (5.59 , 6.64) | 6.11                       | (5.60 , 6.63) | 17.12            | (15.15 , 19.21) | 22.56            | (20.40 , 24.83) |
| 2008130 | 40.86          | (36.44 , 45.53) | 33.78          | (29.23 , 38.65) | 5.80                       | (5.30 , 6.32) | 5.81                       | (5.32 , 6.33) | 17.12            | (15.15 , 19.21) | 22.56            | (20.40 , 24.83) |
| 2008100 | 38.27          | (33.92 , 42.87) | 33.85          | (29.25 , 38.79) | 5.48                       | (4.99 , 6.00) | 5.50                       | (5.01 , 6.01) | 17.64            | (16.01 , 19.35) | 22.56            | (20.40 , 24.83) |

| Family  | lateral length |                 | lateral length |                 | number of nodes on lateral |               | number of nodes on lateral |               | internode length |                 | internode length |                 |
|---------|----------------|-----------------|----------------|-----------------|----------------------------|---------------|----------------------------|---------------|------------------|-----------------|------------------|-----------------|
|         | 16 months *    |                 | 28 months *    |                 | 16 months *                |               | 28 months *                |               | 16 months *      |                 | 28 months *      |                 |
| 2008132 | 44.66          | (40.04 , 49.53) | 36.65          | (31.78 , 41.86) | 6.35                       | (5.83 , 6.89) | 6.35                       | (5.83 , 6.88) | 17.12            | (15.15 , 19.21) | 22.56            | (20.40 , 24.83) |
| 2008256 | 37.40          | (33.19 , 41.87) | 33.95          | (29.34 , 38.89) | 5.39                       | (4.91 , 5.89) | 5.40                       | (4.93 , 5.90) | 17.86            | (16.22 , 19.59) | 22.56            | (20.40 , 24.83) |
| 2008093 | 39.23          | (34.91 , 43.81) | 33.21          | (28.72 , 38.03) | 5.93                       | (5.43 , 6.46) | 5.94                       | (5.44 , 6.46) | 17.12            | (15.15 , 19.21) | 22.56            | (20.40 , 24.83) |
| 2008108 | 51.32          | (46.36 , 56.54) | 40.98          | (35.96 , 46.33) | 6.41                       | (5.89 , 6.95) | 6.40                       | (5.89 , 6.94) | 15.88            | (14.33 , 17.51) | 22.56            | (20.40 , 24.83) |
| 2008179 | 46.36          | (41.64 , 51.33) | 40.81          | (35.81 , 46.14) | 6.87                       | (6.33 , 7.43) | 6.85                       | (6.32 , 7.41) | 18.54            | (16.86 , 20.29) | 22.56            | (20.40 , 24.83) |
| 2008192 | 43.89          | (39.23 , 48.82) | 38.56          | (33.65 , 43.81) | 5.84                       | (5.33 , 6.37) | 5.85                       | (5.35 , 6.37) | 17.29            | (15.52 , 19.16) | 22.56            | (20.40 , 24.83) |
| 2008089 | 38.04          | (33.71 , 42.64) | 32.29          | (27.80 , 37.12) | 5.78                       | (5.27 , 6.30) | 5.79                       | (5.29 , 6.31) | 17.11            | (15.71 , 18.57) | 22.56            | (20.40 , 24.83) |
| 2008064 | 44.82          | (40.11 , 49.79) | 38.75          | (33.82 , 44.02) | 6.45                       | (5.92 , 7.00) | 6.44                       | (5.92 , 6.99) | 17.12            | (15.15 , 19.21) | 22.56            | (20.40 , 24.83) |
| 2008269 | 44.80          | (40.09 , 49.77) | 39.54          | (34.38 , 45.05) | 6.23                       | (5.70 , 6.79) | 6.23                       | (5.71 , 6.78) | 17.12            | (15.15 , 19.21) | 22.56            | (20.40 , 24.83) |
| 2008059 | 49.83          | (44.94 , 54.97) | 43.34          | (38.17 , 48.84) | 6.05                       | (5.54 , 6.58) | 6.05                       | (5.55 , 6.57) | 16.63            | (15.04 , 18.30) | 22.56            | (20.40 , 24.83) |
| 2008047 | 44.58          | (39.88 , 49.54) | 36.46          | (31.52 , 41.76) | 5.78                       | (5.27 , 6.30) | 5.79                       | (5.29 , 6.31) | 17.12            | (15.15 , 19.21) | 22.56            | (20.40 , 24.83) |
| 2008194 | 41.09          | (36.66 , 45.77) | 34.55          | (29.89 , 39.56) | 5.90                       | (5.39 , 6.42) | 5.90                       | (5.41 , 6.42) | 17.12            | (15.15 , 19.21) | 22.56            | (20.40 , 24.83) |
| 2008232 | 39.94          | (35.58 , 44.56) | 34.31          | (29.60 , 39.37) | 6.50                       | (5.97 , 7.05) | 6.50                       | (5.97 , 7.04) | 17.09            | (15.47 , 18.78) | 22.56            | (20.40 , 24.83) |
| 2008173 | 45.47          | (40.80 , 50.39) | 39.90          | (34.95 , 45.17) | 6.21                       | (5.69 , 6.76) | 6.21                       | (5.69 , 6.75) | 17.12            | (15.15 , 19.21) | 22.56            | (20.40 , 24.83) |
| 2008120 | 38.12          | (33.70 , 42.82) | 31.61          | (27.10 , 36.46) | 5.46                       | (4.96 , 5.98) | 5.48                       | (4.98 , 5.99) | 16.60            | (15.13 , 18.14) | 22.56            | (20.40 , 24.83) |
| 2008262 | 49.57          | (44.61 , 54.79) | 45.03          | (39.69 , 50.72) | 6.47                       | (5.94 , 7.03) | 6.46                       | (5.94 , 7.01) | 18.49            | (17.04 , 20.00) | 22.56            | (20.40 , 24.83) |
| 2008187 | 39.11          | (34.71 , 43.77) | 35.79          | (31.05 , 40.87) | 5.72                       | (5.22 , 6.24) | 5.73                       | (5.23 , 6.25) | 17.12            | (15.15 , 19.21) | 22.56            | (20.40 , 24.83) |
| 2008051 | 41.25          | (36.73 , 46.02) | 36.02          | (31.26 , 41.10) | 6.02                       | (5.49 , 6.56) | 6.02                       | (5.50 , 6.56) | 17.12            | (15.15 , 19.21) | 22.56            | (20.40 , 24.83) |
| 2008198 | 38.81          | (34.17 , 43.75) | 32.91          | (28.16 , 38.03) | 5.57                       | (5.05 , 6.12) | 5.59                       | (5.07 , 6.12) | 16.79            | (15.05 , 18.63) | 22.56            | (20.40 , 24.83) |
| 2008054 | 39.64          | (35.29 , 44.25) | 35.98          | (31.29 , 40.99) | 5.70                       | (5.21 , 6.22) | 5.71                       | (5.23 , 6.22) | 17.12            | (15.15 , 19.21) | 22.56            | (20.40 , 24.83) |
| 2008244 | 43.15          | (38.61 , 47.94) | 37.33          | (32.55 , 42.45) | 6.56                       | (6.03 , 7.11) | 6.56                       | (6.03 , 7.10) | 17.12            | (15.15 , 19.21) | 22.56            | (20.40 , 24.83) |
| 2008177 | 48.94          | (44.01 , 54.13) | 41.28          | (36.12 , 46.80) | 6.37                       | (5.84 , 6.92) | 6.37                       | (5.85 , 6.91) | 17.12            | (15.15 , 19.21) | 22.56            | (20.40 , 24.83) |
| 2008117 | 42.08          | (37.59 , 46.83) | 33.10          | (28.59 , 37.94) | 5.88                       | (5.38 , 6.40) | 5.88                       | (5.39 , 6.40) | 17.98            | (16.32 , 19.71) | 22.56            | (20.40 , 24.83) |
| 2008016 | 47.87          | (42.99 , 53.01) | 44.12          | (38.84 , 49.74) | 6.42                       | (5.89 , 6.98) | 6.42                       | (5.89 , 6.97) | 17.12            | (15.15 , 19.21) | 22.56            | (20.40 , 24.83) |
| 2008267 | 45.94          | (41.17 , 50.98) | 41.40          | (36.29 , 46.84) | 6.23                       | (5.71 , 6.78) | 6.23                       | (5.71 , 6.77) | 19.65            | (17.92 , 21.45) | 22.56            | (20.40 , 24.83) |
| 2008040 | 44.73          | (39.93 , 49.81) | 38.96          | (33.94 , 44.34) | 5.83                       | (5.31 , 6.36) | 5.84                       | (5.33 , 6.37) | 17.14            | (15.53 , 18.83) | 22.56            | (20.40 , 24.83) |
| 2008218 | 44.14          | (39.54 , 48.99) | 33.74          | (29.20 , 38.61) | 6.23                       | (5.71 , 6.77) | 6.23                       | (5.72 , 6.76) | 17.51            | (15.88 , 19.22) | 22.56            | (20.40 , 24.83) |
| 2008070 | 43.65          | (39.09 , 48.47) | 38.39          | (33.49 , 43.64) | 6.37                       | (5.85 , 6.91) | 6.36                       | (5.85 , 6.90) | 17.12            | (15.15 , 19.21) | 22.56            | (20.40 , 24.83) |
| 2008102 | 38.90          | (34.35 , 43.74) | 33.03          | (28.35 , 38.08) | 6.16                       | (5.62 , 6.72) | 6.16                       | (5.63 , 6.72) | 17.12            | (15.15 , 19.21) | 22.56            | (20.40 , 24.83) |
| 2008078 | 42.14          | (37.66 , 46.87) | 36.55          | (31.83 , 41.59) | 6.03                       | (5.52 , 6.55) | 6.03                       | (5.53 , 6.55) | 16.00            | (14.80 , 17.24) | 22.56            | (20.40 , 24.83) |
| 2008074 | 43.86          | (39.19 , 48.79) | 35.62          | (30.88 , 40.70) | 6.06                       | (5.54 , 6.61) | 6.07                       | (5.55 , 6.61) | 17.12            | (15.15 , 19.21) | 22.56            | (20.40 , 24.83) |

d.

| Family  | height to the cones |               | height to the cones |               | green cone weight |               |
|---------|---------------------|---------------|---------------------|---------------|-------------------|---------------|
|         | 16 months           |               | 28 months           |               | 28 months *       |               |
| 2008003 | 1.68                | (1.54 , 1.83) | 1.68                | (1.52 , 1.84) | 0.94              | (0.82 , 1.08) |
| 2008190 | 1.80                | (1.66 , 1.94) | 1.82                | (1.67 , 1.97) | 0.91              | (0.78 , 1.04) |
| 2008209 | 1.85                | (1.70 , 1.99) | 1.87                | (1.71 , 2.04) | 0.90              | (0.78 , 1.03) |
| 2008151 | 1.76                | (1.61 , 1.91) | 1.71                | (1.54 , 1.88) | 0.89              | (0.77 , 1.03) |
| 2008039 | 1.88                | (1.73 , 2.02) | 1.91                | (1.75 , 2.06) | 0.93              | (0.80 , 1.07) |
| 2008152 | 1.86                | (1.72 , 1.99) | 1.89                | (1.75 , 2.04) | 0.86              | (0.74 , 0.99) |
| 2008001 | 1.86                | (1.71 , 2.00) | 1.89                | (1.72 , 2.05) | 0.93              | (0.81 , 1.07) |
| 2008073 | 1.90                | (1.75 , 2.05) | 1.95                | (1.79 , 2.12) | 0.92              | (0.79 , 1.06) |
| 2008168 | 1.62                | (1.47 , 1.76) | 1.59                | (1.43 , 1.74) | 0.93              | (0.80 , 1.06) |
| 2008161 | 1.78                | (1.64 , 1.92) | 1.77                | (1.61 , 1.94) | 0.93              | (0.81 , 1.06) |
| 2008290 | 1.72                | (1.58 , 1.87) | 1.73                | (1.57 , 1.89) | 0.85              | (0.73 , 0.98) |
| 2008208 | 1.61                | (1.47 , 1.75) | 1.59                | (1.44 , 1.74) | 0.95              | (0.82 , 1.09) |
| 2008251 | 1.84                | (1.69 , 1.98) | 1.86                | (1.71 , 2.02) | 0.88              | (0.76 , 1.01) |
| 2008052 | 1.83                | (1.68 , 1.98) | 1.86                | (1.69 , 2.02) | 0.87              | (0.74 , 1.00) |
| 2008037 | 1.77                | (1.61 , 1.92) | 1.79                | (1.62 , 1.96) | 0.92              | (0.80 , 1.06) |
| 2008154 | 1.61                | (1.47 , 1.75) | 1.63                | (1.47 , 1.79) | 0.94              | (0.82 , 1.08) |
| 2008136 | 1.63                | (1.49 , 1.77) | 1.63                | (1.47 , 1.79) | 0.84              | (0.72 , 0.97) |
| 2008096 | 1.76                | (1.62 , 1.91) | 1.78                | (1.62 , 1.93) | 0.94              | (0.81 , 1.08) |
| 2008071 | 1.85                | (1.72 , 1.99) | 1.88                | (1.74 , 2.03) | 0.93              | (0.81 , 1.07) |
| 2008124 | 1.83                | (1.69 , 1.98) | 1.86                | (1.70 , 2.03) | 0.91              | (0.78 , 1.04) |
| 2008145 | 1.60                | (1.47 , 1.74) | 1.57                | (1.43 , 1.72) | 0.93              | (0.81 , 1.07) |
| 2008084 | 1.85                | (1.71 , 2.00) | 1.91                | (1.74 , 2.08) | 0.91              | (0.78 , 1.05) |
| 2008083 | 1.79                | (1.64 , 1.93) | 1.96                | (1.79 , 2.13) | 0.88              | (0.75 , 1.01) |
| 2008056 | 1.84                | (1.68 , 2.00) | 1.89                | (1.71 , 2.06) | 0.92              | (0.79 , 1.06) |
| 2008261 | 1.80                | (1.65 , 1.95) | 1.83                | (1.67 , 1.99) | 0.91              | (0.78 , 1.04) |
| 2008157 | 1.75                | (1.60 , 1.89) | 1.76                | (1.60 , 1.92) | 0.91              | (0.78 , 1.04) |
| 2008006 | 1.79                | (1.64 , 1.93) | 1.81                | (1.63 , 1.98) | 0.85              | (0.73 , 0.98) |
| 2008240 | 1.62                | (1.47 , 1.76) | 1.60                | (1.44 , 1.75) | 0.87              | (0.74 , 1.00) |
| 2008103 | 1.67                | (1.53 , 1.80) | 1.66                | (1.50 , 1.81) | 0.94              | (0.81 , 1.07) |
| 2008148 | 1.79                | (1.65 , 1.92) | 1.82                | (1.68 , 1.96) | 0.93              | (0.81 , 1.06) |
| 2008236 | 1.96                | (1.82 , 2.10) | 1.88                | (1.72 , 2.04) | 0.88              | (0.76 , 1.01) |
| 2008259 | 1.65                | (1.49 , 1.81) | 1.63                | (1.45 , 1.80) | 0.94              | (0.81 , 1.08) |
| 2008191 | 1.91                | (1.77 , 2.05) | 1.98                | (1.83 , 2.13) | 0.85              | (0.73 , 0.98) |
| 2008242 | 1.81                | (1.68 , 1.94) | 1.85                | (1.70 , 1.99) | 0.92              | (0.80 , 1.05) |

| Family  | height to the cones |               | height to the cones |               | green cone weight |               |
|---------|---------------------|---------------|---------------------|---------------|-------------------|---------------|
|         | 16 months           |               | 28 months           |               | 28 months *       |               |
| 2008248 | 1.87                | (1.72 , 2.01) | 1.90                | (1.75 , 2.06) | 0.88              | (0.76 , 1.01) |
| 2008010 | 1.63                | (1.49 , 1.77) | 1.62                | (1.47 , 1.77) | 0.86              | (0.74 , 0.99) |
| 2008263 | 1.61                | (1.47 , 1.75) | 1.58                | (1.43 , 1.73) | 0.91              | (0.79 , 1.05) |
| 2008153 | 1.48                | (1.34 , 1.61) | 1.44                | (1.30 , 1.58) | 0.92              | (0.80 , 1.05) |
| 2008119 | 1.68                | (1.54 , 1.81) | 1.59                | (1.44 , 1.74) | 0.91              | (0.79 , 1.05) |
| 2008206 | 1.69                | (1.56 , 1.82) | 1.66                | (1.51 , 1.81) | 0.90              | (0.77 , 1.03) |
| 2008139 | 1.85                | (1.72 , 1.98) | 1.87                | (1.73 , 2.01) | 0.88              | (0.75 , 1.01) |
| 2008106 | 1.65                | (1.51 , 1.80) | 1.64                | (1.49 , 1.80) | 0.88              | (0.76 , 1.01) |
| 2008122 | 1.80                | (1.64 , 1.95) | 1.81                | (1.64 , 1.99) | 0.89              | (0.76 , 1.02) |
| 2008155 | 1.70                | (1.56 , 1.85) | 1.69                | (1.54 , 1.85) | 0.87              | (0.75 , 1.00) |
| 2008088 | 1.52                | (1.38 , 1.66) | 1.53                | (1.37 , 1.69) | 0.91              | (0.78 , 1.04) |
| 2008111 | 1.74                | (1.57 , 1.90) | 1.74                | (1.55 , 1.92) | 0.87              | (0.75 , 1.00) |
| 2008202 | 1.69                | (1.54 , 1.83) | 1.69                | (1.54 , 1.85) | 0.89              | (0.77 , 1.03) |
| 2008013 | 1.85                | (1.70 , 2.00) | 1.87                | (1.71 , 2.03) | 0.87              | (0.75 , 1.00) |
| 2008279 | 1.76                | (1.60 , 1.92) | 1.77                | (1.59 , 1.94) | 0.91              | (0.79 , 1.05) |
| 2008007 | 1.61                | (1.46 , 1.75) | 1.59                | (1.43 , 1.74) | 0.89              | (0.77 , 1.02) |
| 2008090 | 1.69                | (1.55 , 1.83) | 1.76                | (1.60 , 1.92) | 0.94              | (0.81 , 1.07) |
| 2008055 | 1.65                | (1.51 , 1.78) | 1.83                | (1.67 , 2.00) | 0.92              | (0.80 , 1.06) |
| 2008271 | 1.77                | (1.63 , 1.91) | 1.77                | (1.62 , 1.93) | 0.92              | (0.80 , 1.06) |
| 2008035 | 1.88                | (1.74 , 2.03) | 1.92                | (1.76 , 2.08) | 0.94              | (0.81 , 1.07) |
| 2008212 | 1.74                | (1.59 , 1.88) | 1.73                | (1.57 , 1.89) | 0.94              | (0.81 , 1.07) |
| 2008149 | 1.70                | (1.56 , 1.85) | 1.70                | (1.54 , 1.86) | 0.88              | (0.76 , 1.01) |
| 2008170 | 1.75                | (1.60 , 1.89) | 1.77                | (1.62 , 1.93) | 0.98              | (0.85 , 1.12) |
| 2008247 | 1.66                | (1.51 , 1.80) | 1.65                | (1.49 , 1.81) | 1.00              | (0.87 , 1.14) |
| 2008110 | 1.82                | (1.66 , 1.97) | 1.84                | (1.67 , 2.01) | 0.90              | (0.78 , 1.04) |
| 2008043 | 1.77                | (1.64 , 1.90) | 1.79                | (1.65 , 1.93) | 0.91              | (0.79 , 1.05) |
| 2008188 | 1.77                | (1.62 , 1.92) | 1.79                | (1.62 , 1.95) | 0.89              | (0.76 , 1.02) |
| 2008080 | 1.76                | (1.60 , 1.92) | 1.77                | (1.59 , 1.94) | 0.91              | (0.79 , 1.05) |
| 2008239 | 1.80                | (1.66 , 1.94) | 1.82                | (1.67 , 1.97) | 0.89              | (0.77 , 1.03) |
| 2008075 | 1.63                | (1.49 , 1.76) | 1.61                | (1.45 , 1.76) | 0.84              | (0.72 , 0.97) |
| 2008114 | 1.81                | (1.67 , 1.96) | 1.83                | (1.67 , 1.98) | 0.88              | (0.75 , 1.01) |
| 2008166 | 1.74                | (1.59 , 1.88) | 1.76                | (1.59 , 1.92) | 0.91              | (0.78 , 1.04) |
| 2008252 | 1.85                | (1.72 , 1.99) | 1.88                | (1.74 , 2.03) | 0.89              | (0.77 , 1.02) |
| 2008150 | 1.57                | (1.43 , 1.71) | 1.54                | (1.39 , 1.69) | 0.93              | (0.80 , 1.06) |
| 2008009 | 1.80                | (1.67 , 1.94) | 1.82                | (1.67 , 1.96) | 0.88              | (0.76 , 1.01) |
| 2008081 | 1.80                | (1.64 , 1.96) | 1.78                | (1.58 , 1.97) | 0.87              | (0.74 , 1.00) |

| Family  | height to the cones |               | height to the cones |               | green cone weight |               |
|---------|---------------------|---------------|---------------------|---------------|-------------------|---------------|
|         | 16 months           |               | 28 months           |               | 28 months *       |               |
| 2008041 | 1.67                | (1.53 , 1.81) | 1.67                | (1.53 , 1.82) | 0.89              | (0.77 , 1.03) |
| 2008061 | 1.61                | (1.46 , 1.76) | 1.58                | (1.42 , 1.74) | 0.95              | (0.82 , 1.09) |
| 2008087 | 1.61                | (1.45 , 1.77) | 1.58                | (1.40 , 1.76) | 0.89              | (0.76 , 1.02) |
| 2008147 | 1.63                | (1.49 , 1.77) | 1.66                | (1.51 , 1.81) | 0.92              | (0.79 , 1.05) |
| 2008258 | 1.58                | (1.44 , 1.72) | 1.63                | (1.46 , 1.81) | 0.89              | (0.77 , 1.03) |
| 2008130 | 1.87                | (1.73 , 2.01) | 1.93                | (1.76 , 2.09) | 0.90              | (0.78 , 1.03) |
| 2008100 | 1.68                | (1.53 , 1.83) | 1.68                | (1.51 , 1.84) | 0.92              | (0.79 , 1.06) |
| 2008132 | 1.66                | (1.50 , 1.82) | 1.65                | (1.47 , 1.82) | 0.90              | (0.78 , 1.04) |
| 2008256 | 1.79                | (1.63 , 1.94) | 1.78                | (1.61 , 1.96) | 0.93              | (0.80 , 1.07) |
| 2008093 | 1.86                | (1.72 , 2.00) | 1.89                | (1.74 , 2.05) | 0.88              | (0.76 , 1.01) |
| 2008108 | 1.73                | (1.58 , 1.87) | 1.70                | (1.53 , 1.86) | 0.91              | (0.79 , 1.05) |
| 2008179 | 1.97                | (1.83 , 2.10) | 2.00                | (1.84 , 2.15) | 0.88              | (0.75 , 1.01) |
| 2008192 | 1.61                | (1.46 , 1.75) | 1.58                | (1.43 , 1.74) | 0.90              | (0.77 , 1.03) |
| 2008089 | 1.57                | (1.43 , 1.71) | 1.53                | (1.38 , 1.68) | 0.88              | (0.76 , 1.01) |
| 2008064 | 1.69                | (1.54 , 1.83) | 1.68                | (1.52 , 1.84) | 0.89              | (0.77 , 1.03) |
| 2008269 | 1.73                | (1.56 , 1.89) | 1.74                | (1.56 , 1.92) | 0.90              | (0.77 , 1.04) |
| 2008059 | 1.76                | (1.61 , 1.90) | 1.76                | (1.60 , 1.91) | 0.86              | (0.74 , 0.99) |
| 2008047 | 1.78                | (1.63 , 1.94) | 1.79                | (1.62 , 1.96) | 0.89              | (0.77 , 1.02) |
| 2008194 | 1.77                | (1.63 , 1.92) | 1.78                | (1.61 , 1.94) | 0.88              | (0.76 , 1.02) |
| 2008232 | 1.76                | (1.62 , 1.91) | 1.78                | (1.62 , 1.93) | 0.89              | (0.77 , 1.02) |
| 2008173 | 2.09                | (1.96 , 2.23) | 2.25                | (2.09 , 2.40) | 0.88              | (0.76 , 1.01) |
| 2008120 | 1.80                | (1.65 , 1.94) | 1.81                | (1.65 , 1.96) | 0.89              | (0.77 , 1.02) |
| 2008262 | 1.66                | (1.50 , 1.81) | 1.65                | (1.48 , 1.82) | 0.89              | (0.76 , 1.02) |
| 2008187 | 1.72                | (1.57 , 1.86) | 1.65                | (1.49 , 1.81) | 0.90              | (0.78 , 1.04) |
| 2008051 | 1.67                | (1.52 , 1.82) | 1.66                | (1.50 , 1.82) | 0.90              | (0.77 , 1.04) |
| 2008198 | 1.58                | (1.44 , 1.73) | 1.55                | (1.40 , 1.71) | 0.97              | (0.84 , 1.11) |
| 2008054 | 1.78                | (1.64 , 1.91) | 1.75                | (1.60 , 1.91) | 0.89              | (0.77 , 1.02) |
| 2008244 | 1.71                | (1.56 , 1.85) | 1.71                | (1.55 , 1.86) | 0.88              | (0.75 , 1.01) |
| 2008177 | 1.86                | (1.71 , 2.01) | 1.80                | (1.64 , 1.97) | 0.86              | (0.74 , 0.99) |
| 2008117 | 1.76                | (1.63 , 1.89) | 1.94                | (1.78 , 2.10) | 0.90              | (0.78 , 1.04) |
| 2008016 | 1.86                | (1.72 , 2.00) | 1.89                | (1.74 , 2.04) | 0.88              | (0.76 , 1.02) |
| 2008267 | 1.72                | (1.58 , 1.87) | 1.72                | (1.56 , 1.87) | 0.90              | (0.78 , 1.04) |
| 2008040 | 1.82                | (1.67 , 1.96) | 1.85                | (1.68 , 2.01) | 0.86              | (0.73 , 0.99) |
| 2008218 | 1.58                | (1.44 , 1.72) | 1.72                | (1.55 , 1.89) | 0.93              | (0.80 , 1.06) |
| 2008070 | 1.68                | (1.52 , 1.83) | 1.69                | (1.52 , 1.87) | 0.91              | (0.79 , 1.05) |
| 2008102 | 1.79                | (1.66 , 1.92) | 1.74                | (1.59 , 1.89) | 0.88              | (0.76 , 1.01) |

| Family  | height to the cones |               | height to the cones |               | green cone weight |               |
|---------|---------------------|---------------|---------------------|---------------|-------------------|---------------|
|         | 16 months           |               | 28 months           |               | 28 months *       |               |
| 2008078 | 1.77                | (1.62 , 1.93) | 1.78                | (1.62 , 1.95) | 0.96              | (0.83 , 1.09) |
| 2008074 | 1.66                | (1.52 , 1.80) | 1.55                | (1.38 , 1.73) | 0.96              | (0.84 , 1.10) |

e.

| Family  | cohumulone  |               | cohumulone  |               | humulone + adhumulone |               | humulone + adhumulone |               | colupulone  |               | colupulone  |               | lupulone + adlupulone |               | lupulone + adlupulone |               |
|---------|-------------|---------------|-------------|---------------|-----------------------|---------------|-----------------------|---------------|-------------|---------------|-------------|---------------|-----------------------|---------------|-----------------------|---------------|
|         | 16 months * |               | 28 months * |               | 16 months *           |               | 28 months *           |               | 16 months * |               | 28 months * |               | 16 months *           |               | 28 months *           |               |
| 2008003 | 2.95        | (2.57 , 3.36) | 2.56        | (2.22 , 2.91) | 6.59                  | (5.86 , 7.35) | 5.22                  | (4.62 , 5.85) | 2.35        | (2.04 , 2.69) | 2.58        | (2.27 , 2.90) | 2.03                  | (1.75 , 2.33) | 2.12                  | (1.83 , 2.44) |
| 2008190 | 2.03        | (1.74 , 2.34) | 2.08        | (1.78 , 2.40) | 5.30                  | (4.70 , 5.94) | 4.80                  | (4.23 , 5.41) | 1.94        | (1.68 , 2.22) | 2.29        | (2.00 , 2.59) | 1.87                  | (1.61 , 2.14) | 2.12                  | (1.83 , 2.44) |
| 2008209 | 3.09        | (2.66 , 3.55) | 2.56        | (2.22 , 2.92) | 7.24                  | (6.40 , 8.12) | 5.39                  | (4.78 , 6.03) | 2.16        | (1.84 , 2.51) | 2.49        | (2.19 , 2.81) | 2.04                  | (1.73 , 2.38) | 2.11                  | (1.81 , 2.42) |
| 2008151 | 2.91        | (2.50 , 3.36) | 2.41        | (2.09 , 2.76) | 7.06                  | (6.23 , 7.93) | 5.65                  | (5.03 , 6.31) | 2.40        | (2.06 , 2.77) | 2.51        | (2.21 , 2.83) | 2.24                  | (1.92 , 2.59) | 2.38                  | (2.07 , 2.71) |
| 2008039 | 2.79        | (2.38 , 3.22) | 2.45        | (2.09 , 2.83) | 5.59                  | (4.86 , 6.37) | 5.36                  | (4.71 , 6.06) | 1.95        | (1.64 , 2.28) | 2.42        | (2.11 , 2.76) | 1.60                  | (1.33 , 1.90) | 2.07                  | (1.76 , 2.42) |
| 2008152 | 2.76        | (2.45 , 3.10) | 2.09        | (1.79 , 2.42) | 7.30                  | (6.64 , 7.99) | 4.73                  | (4.17 , 5.33) | 2.56        | (2.27 , 2.86) | 2.47        | (2.17 , 2.78) | 2.28                  | (2.01 , 2.56) | 2.11                  | (1.82 , 2.43) |
| 2008001 | 2.73        | (2.40 , 3.09) | 2.54        | (2.21 , 2.90) | 6.26                  | (5.60 , 6.95) | 5.73                  | (5.11 , 6.39) | 2.13        | (1.85 , 2.42) | 2.39        | (2.10 , 2.70) | 1.88                  | (1.63 , 2.16) | 2.07                  | (1.78 , 2.38) |
| 2008073 | 2.03        | (1.72 , 2.37) | 2.29        | (1.94 , 2.66) | 4.86                  | (4.24 , 5.52) | 4.86                  | (4.24 , 5.52) | 1.97        | (1.69 , 2.28) | 2.36        | (2.05 , 2.69) | 1.79                  | (1.52 , 2.07) | 1.91                  | (1.61 , 2.24) |
| 2008168 | 2.58        | (2.19 , 3.00) | 2.11        | (1.81 , 2.44) | 6.84                  | (6.03 , 7.71) | 4.72                  | (4.16 , 5.32) | 2.59        | (2.24 , 2.97) | 2.47        | (2.17 , 2.78) | 2.59                  | (2.24 , 2.96) | 2.15                  | (1.85 , 2.46) |
| 2008161 | 2.63        | (2.28 , 3.02) | 2.23        | (1.93 , 2.54) | 7.03                  | (6.28 , 7.82) | 5.24                  | (4.69 , 5.83) | 2.11        | (1.82 , 2.43) | 2.51        | (2.23 , 2.81) | 2.09                  | (1.80 , 2.40) | 2.34                  | (2.06 , 2.65) |
| 2008290 | 2.59        | (2.26 , 2.94) | 2.38        | (2.06 , 2.73) | 7.01                  | (6.32 , 7.74) | 5.46                  | (4.85 , 6.10) | 2.00        | (1.73 , 2.29) | 2.27        | (1.99 , 2.58) | 2.01                  | (1.75 , 2.30) | 2.01                  | (1.72 , 2.31) |
| 2008208 | 2.63        | (2.23 , 3.05) | 2.22        | (1.91 , 2.56) | 6.79                  | (5.98 , 7.66) | 5.27                  | (4.67 , 5.90) | 2.10        | (1.78 , 2.44) | 2.37        | (2.08 , 2.68) | 2.06                  | (1.74 , 2.39) | 2.20                  | (1.90 , 2.52) |
| 2008251 | 2.46        | (2.08 , 2.87) | 2.17        | (1.86 , 2.51) | 6.31                  | (5.53 , 7.13) | 5.05                  | (4.46 , 5.67) | 2.31        | (1.98 , 2.67) | 2.36        | (2.07 , 2.67) | 2.34                  | (2.01 , 2.70) | 2.21                  | (1.91 , 2.53) |
| 2008052 | 2.19        | (1.91 , 2.49) | 2.32        | (2.00 , 2.66) | 5.43                  | (4.86 , 6.03) | 4.81                  | (4.24 , 5.42) | 1.80        | (1.56 , 2.06) | 2.16        | (1.89 , 2.46) | 1.70                  | (1.47 , 1.95) | 1.74                  | (1.47 , 2.02) |
| 2008037 | 1.87        | (1.57 , 2.20) | 2.12        | (1.82 , 2.45) | 5.36                  | (4.70 , 6.05) | 5.15                  | (4.56 , 5.78) | 1.76        | (1.50 , 2.05) | 2.16        | (1.88 , 2.46) | 1.82                  | (1.55 , 2.11) | 1.98                  | (1.70 , 2.29) |
| 2008154 | 3.53        | (3.11 , 3.97) | 3.13        | (2.75 , 3.52) | 6.60                  | (5.87 , 7.37) | 5.51                  | (4.90 , 6.16) | 2.60        | (2.27 , 2.95) | 2.71        | (2.40 , 3.05) | 1.99                  | (1.71 , 2.29) | 1.99                  | (1.70 , 2.29) |
| 2008136 | 2.84        | (2.54 , 3.16) | 2.47        | (2.16 , 2.80) | 7.27                  | (6.65 , 7.92) | 5.39                  | (4.83 , 5.99) | 2.31        | (2.05 , 2.58) | 2.45        | (2.17 , 2.75) | 2.36                  | (2.10 , 2.63) | 2.15                  | (1.87 , 2.44) |
| 2008096 | 2.27        | (2.00 , 2.56) | 2.31        | (1.99 , 2.65) | 5.11                  | (4.59 , 5.66) | 4.89                  | (4.32 , 5.51) | 1.97        | (1.74 , 2.23) | 2.27        | (1.99 , 2.58) | 1.84                  | (1.61 , 2.08) | 1.90                  | (1.63 , 2.20) |
| 2008071 | 2.80        | (2.48 , 3.14) | 2.27        | (1.98 , 2.59) | 6.78                  | (6.14 , 7.45) | 5.01                  | (4.47 , 5.58) | 2.13        | (1.87 , 2.41) | 2.23        | (1.97 , 2.52) | 2.14                  | (1.88 , 2.41) | 1.98                  | (1.72 , 2.26) |
| 2008124 | 2.64        | (2.25 , 3.07) | 2.35        | (2.00 , 2.73) | 6.52                  | (5.73 , 7.36) | 5.01                  | (4.38 , 5.68) | 2.27        | (1.94 , 2.62) | 2.33        | (2.02 , 2.66) | 2.21                  | (1.89 , 2.56) | 1.95                  | (1.64 , 2.29) |
| 2008145 | 3.17        | (2.87 , 3.49) | 2.57        | (2.26 , 2.91) | 7.43                  | (6.83 , 8.05) | 5.68                  | (5.10 , 6.29) | 2.56        | (2.30 , 2.83) | 2.50        | (2.22 , 2.80) | 2.39                  | (2.14 , 2.64) | 2.17                  | (1.90 , 2.47) |
| 2008084 | 2.20        | (1.92 , 2.50) | 2.47        | (2.11 , 2.85) | 5.93                  | (5.33 , 6.56) | 5.39                  | (4.74 , 6.09) | 2.17        | (1.91 , 2.45) | 2.59        | (2.26 , 2.93) | 2.21                  | (1.95 , 2.49) | 2.32                  | (1.98 , 2.68) |
| 2008083 | 2.72        | (2.36 , 3.11) | 2.61        | (2.27 , 2.98) | 7.09                  | (6.34 , 7.89) | 5.86                  | (5.23 , 6.52) | 2.25        | (1.95 , 2.57) | 2.34        | (2.05 , 2.65) | 2.30                  | (2.00 , 2.63) | 2.03                  | (1.74 , 2.33) |
| 2008056 | 2.55        | (2.19 , 2.93) | 2.30        | (1.95 , 2.67) | 6.02                  | (5.32 , 6.75) | 5.06                  | (4.43 , 5.74) | 2.49        | (2.17 , 2.83) | 2.54        | (2.22 , 2.89) | 2.29                  | (1.99 , 2.62) | 2.33                  | (1.99 , 2.70) |
| 2008261 | 2.93        | (2.58 , 3.31) | 2.49        | (2.16 , 2.84) | 6.62                  | (5.94 , 7.33) | 5.29                  | (4.69 , 5.92) | 2.32        | (2.03 , 2.63) | 2.40        | (2.11 , 2.71) | 2.10                  | (1.83 , 2.39) | 2.03                  | (1.74 , 2.34) |

| Family  | cohumulone  |              | cohumulone  |              | humulone +<br>adhumulone |              | humulone +<br>adhumulone |              | colupulone  |              | colupulone  |              | lupulone +<br>adlupulone |              | lupulone +<br>adlupulone |              |
|---------|-------------|--------------|-------------|--------------|--------------------------|--------------|--------------------------|--------------|-------------|--------------|-------------|--------------|--------------------------|--------------|--------------------------|--------------|
|         | 16 months * |              | 28 months * |              | 16 months *              |              | 28 months *              |              | 16 months * |              | 28 months * |              | 16 months *              |              | 28 months *              |              |
| 2008157 | 2.61        | (2.22, 3.03) | 2.21        | (1.89, 2.54) | 6.24                     | (5.46, 7.06) | 4.73                     | (4.17, 5.33) | 2.16        | (1.84, 2.51) | 2.27        | (1.99, 2.58) | 2.07                     | (1.75, 2.40) | 1.90                     | (1.62, 2.20) |
| 2008006 | 2.29        | (1.96, 2.65) | 2.74        | (2.39, 3.11) | 6.06                     | (5.36, 6.79) | 5.63                     | (5.01, 6.28) | 2.08        | (1.79, 2.40) | 2.47        | (2.18, 2.79) | 2.38                     | (2.07, 2.71) | 2.08                     | (1.79, 2.40) |
| 2008240 | 2.65        | (2.34, 2.97) | 2.72        | (2.38, 3.09) | 5.88                     | (5.28, 6.50) | 5.83                     | (5.20, 6.50) | 2.57        | (2.28, 2.87) | 2.46        | (2.16, 2.77) | 2.08                     | (1.83, 2.35) | 2.13                     | (1.83, 2.44) |
| 2008103 | 2.29        | (1.93, 2.69) | 2.61        | (2.29, 2.95) | 6.35                     | (5.57, 7.18) | 5.69                     | (5.11, 6.30) | 2.01        | (1.70, 2.35) | 2.57        | (2.29, 2.88) | 2.14                     | (1.82, 2.48) | 2.35                     | (2.07, 2.66) |
| 2008148 | 2.65        | (2.34, 2.98) | 2.54        | (2.22, 2.87) | 6.18                     | (5.57, 6.82) | 5.18                     | (4.63, 5.77) | 2.28        | (2.01, 2.57) | 2.49        | (2.21, 2.79) | 2.08                     | (1.82, 2.35) | 2.05                     | (1.78, 2.33) |
| 2008236 | 2.90        | (2.60, 3.22) | 2.38        | (2.05, 2.72) | 5.04                     | (4.52, 5.58) | 4.49                     | (3.94, 5.08) | 2.20        | (1.95, 2.46) | 2.36        | (2.07, 2.67) | 1.51                     | (1.31, 1.73) | 1.72                     | (1.46, 2.00) |
| 2008259 | 2.48        | (2.10, 2.89) | 2.39        | (2.04, 2.77) | 6.02                     | (5.26, 6.83) | 5.22                     | (4.58, 5.90) | 2.11        | (1.80, 2.46) | 2.34        | (2.03, 2.67) | 1.95                     | (1.65, 2.28) | 1.99                     | (1.68, 2.33) |
| 2008191 | 3.05        | (2.70, 3.43) | 2.58        | (2.27, 2.92) | 4.85                     | (4.27, 5.46) | 4.37                     | (3.86, 4.91) | 2.36        | (2.07, 2.67) | 2.51        | (2.23, 2.81) | 1.59                     | (1.36, 1.85) | 1.70                     | (1.46, 1.96) |
| 2008242 | 2.35        | (2.04, 2.68) | 1.99        | (1.71, 2.28) | 5.13                     | (4.54, 5.75) | 4.55                     | (4.03, 5.10) | 2.61        | (2.30, 2.93) | 2.34        | (2.07, 2.63) | 2.24                     | (1.96, 2.53) | 2.11                     | (1.84, 2.40) |
| 2008248 | 1.63        | (1.37, 1.91) | 2.04        | (1.74, 2.36) | 4.58                     | (4.02, 5.17) | 4.94                     | (4.37, 5.56) | 1.76        | (1.51, 2.03) | 2.18        | (1.90, 2.48) | 1.90                     | (1.64, 2.17) | 2.08                     | (1.79, 2.39) |
| 2008010 | 2.58        | (2.25, 2.92) | 2.54        | (2.21, 2.90) | 6.32                     | (5.66, 7.01) | 5.13                     | (4.54, 5.75) | 1.91        | (1.65, 2.19) | 2.37        | (2.08, 2.68) | 1.90                     | (1.64, 2.17) | 1.99                     | (1.71, 2.29) |
| 2008263 | 2.58        | (2.25, 2.92) | 2.54        | (2.21, 2.90) | 6.62                     | (5.95, 7.33) | 5.36                     | (4.76, 6.00) | 2.26        | (1.98, 2.57) | 2.50        | (2.21, 2.82) | 2.23                     | (1.95, 2.53) | 2.18                     | (1.88, 2.50) |
| 2008153 | 2.70        | (2.40, 3.01) | 2.39        | (2.09, 2.71) | 6.76                     | (6.16, 7.38) | 5.26                     | (4.71, 5.85) | 2.08        | (1.84, 2.34) | 2.37        | (2.09, 2.66) | 2.04                     | (1.80, 2.29) | 2.08                     | (1.81, 2.37) |
| 2008119 | 2.44        | (2.10, 2.81) | 2.31        | (1.99, 2.65) | 5.77                     | (5.10, 6.49) | 4.94                     | (4.36, 5.55) | 1.96        | (1.68, 2.26) | 2.28        | (2.00, 2.59) | 1.85                     | (1.58, 2.14) | 1.92                     | (1.64, 2.22) |
| 2008206 | 3.02        | (2.66, 3.39) | 2.63        | (2.31, 2.97) | 5.87                     | (5.23, 6.54) | 5.31                     | (4.75, 5.90) | 2.31        | (2.02, 2.62) | 2.55        | (2.26, 2.85) | 1.85                     | (1.60, 2.12) | 2.05                     | (1.79, 2.34) |
| 2008139 | 1.82        | (1.57, 2.10) | 2.02        | (1.73, 2.35) | 4.70                     | (4.17, 5.25) | 4.55                     | (4.00, 5.14) | 2.39        | (2.11, 2.68) | 2.31        | (2.03, 2.62) | 2.41                     | (2.14, 2.70) | 2.11                     | (1.82, 2.42) |
| 2008106 | 2.42        | (2.11, 2.76) | 2.33        | (2.01, 2.68) | 5.77                     | (5.15, 6.44) | 4.98                     | (4.40, 5.59) | 1.90        | (1.64, 2.17) | 2.51        | (2.21, 2.82) | 1.84                     | (1.59, 2.11) | 2.27                     | (1.97, 2.60) |
| 2008122 | 2.38        | (2.00, 2.78) | 2.55        | (2.21, 2.91) | 5.40                     | (4.68, 6.17) | 5.49                     | (4.88, 6.13) | 2.35        | (2.01, 2.71) | 2.61        | (2.30, 2.93) | 2.15                     | (1.84, 2.50) | 2.26                     | (1.95, 2.58) |
| 2008155 | 2.95        | (2.60, 3.32) | 2.60        | (2.26, 2.96) | 5.18                     | (4.59, 5.81) | 5.37                     | (4.77, 6.01) | 2.31        | (2.03, 2.62) | 2.61        | (2.30, 2.93) | 1.60                     | (1.37, 1.85) | 2.16                     | (1.86, 2.47) |
| 2008088 | 2.70        | (2.36, 3.05) | 2.81        | (2.46, 3.19) | 6.66                     | (5.99, 7.37) | 5.94                     | (5.30, 6.61) | 2.31        | (2.02, 2.62) | 2.65        | (2.34, 2.97) | 2.17                     | (1.90, 2.46) | 2.38                     | (2.07, 2.71) |
| 2008111 | 2.31        | (1.94, 2.71) | 2.34        | (1.99, 2.72) | 6.18                     | (5.41, 7.01) | 5.27                     | (4.63, 5.96) | 2.18        | (1.86, 2.53) | 2.52        | (2.20, 2.87) | 2.18                     | (1.86, 2.53) | 2.28                     | (1.95, 2.64) |
| 2008202 | 3.18        | (2.86, 3.52) | 2.64        | (2.30, 3.01) | 6.28                     | (5.70, 6.89) | 5.17                     | (4.57, 5.79) | 2.19        | (1.94, 2.46) | 2.51        | (2.21, 2.83) | 1.81                     | (1.59, 2.05) | 1.92                     | (1.64, 2.22) |
| 2008013 | 2.03        | (1.75, 2.34) | 2.13        | (1.83, 2.46) | 5.93                     | (5.30, 6.60) | 4.98                     | (4.40, 5.59) | 1.96        | (1.69, 2.24) | 2.24        | (1.96, 2.54) | 2.14                     | (1.87, 2.43) | 2.06                     | (1.77, 2.37) |
| 2008279 | 3.38        | (2.93, 3.86) | 2.43        | (2.07, 2.81) | 7.00                     | (6.18, 7.87) | 4.92                     | (4.29, 5.58) | 2.57        | (2.22, 2.95) | 2.37        | (2.06, 2.71) | 2.15                     | (1.83, 2.49) | 1.89                     | (1.59, 2.22) |
| 2008007 | 2.97        | (2.59, 3.37) | 2.62        | (2.28, 2.99) | 6.57                     | (5.84, 7.34) | 5.43                     | (4.83, 6.07) | 2.10        | (1.81, 2.42) | 2.28        | (1.99, 2.58) | 1.88                     | (1.61, 2.18) | 1.90                     | (1.62, 2.20) |
| 2008090 | 3.15        | (2.82, 3.51) | 2.75        | (2.42, 3.09) | 6.73                     | (6.10, 7.40) | 5.74                     | (5.15, 6.35) | 2.18        | (1.91, 2.46) | 2.39        | (2.12, 2.69) | 1.99                     | (1.75, 2.26) | 2.04                     | (1.78, 2.33) |
| 2008055 | 2.40        | (2.11, 2.71) | 2.22        | (1.91, 2.56) | 6.27                     | (5.66, 6.92) | 4.95                     | (4.37, 5.56) | 2.44        | (2.16, 2.74) | 2.48        | (2.19, 2.80) | 2.54                     | (2.26, 2.84) | 2.22                     | (1.92, 2.55) |
| 2008271 | 2.67        | (2.36, 3.00) | 2.49        | (2.16, 2.85) | 6.33                     | (5.71, 6.97) | 5.16                     | (4.57, 5.79) | 2.04        | (1.79, 2.31) | 2.28        | (1.99, 2.58) | 1.80                     | (1.57, 2.05) | 1.85                     | (1.58, 2.15) |
| 2008035 | 2.32        | (2.01, 2.65) | 2.38        | (2.05, 2.73) | 6.01                     | (5.37, 6.69) | 5.33                     | (4.73, 5.97) | 2.05        | (1.78, 2.35) | 2.41        | (2.12, 2.73) | 2.09                     | (1.82, 2.38) | 2.13                     | (1.84, 2.45) |
| 2008212 | 2.38        | (2.04, 2.75) | 2.56        | (2.20, 2.96) | 5.75                     | (5.07, 6.47) | 5.40                     | (4.74, 6.09) | 2.63        | (2.30, 2.98) | 2.63        | (2.30, 2.99) | 2.43                     | (2.12, 2.77) | 2.25                     | (1.92, 2.61) |
| 2008149 | 3.93        | (3.53, 4.36) | 2.41        | (2.08, 2.76) | 6.87                     | (6.18, 7.59) | 4.98                     | (4.40, 5.60) | 2.86        | (2.54, 3.20) | 2.44        | (2.14, 2.75) | 2.19                     | (1.92, 2.49) | 2.04                     | (1.75, 2.35) |
| 2008170 | 2.30        | (2.01, 2.61) | 2.45        | (2.12, 2.80) | 6.31                     | (5.69, 6.95) | 5.38                     | (4.78, 6.02) | 1.94        | (1.69, 2.21) | 2.19        | (1.91, 2.49) | 2.03                     | (1.78, 2.29) | 1.86                     | (1.59, 2.16) |
| 2008247 | 2.31        | (1.95, 2.71) | 2.73        | (2.38, 3.10) | 6.11                     | (5.35, 6.93) | 5.46                     | (4.85, 6.10) | 1.93        | (1.63, 2.26) | 2.40        | (2.10, 2.71) | 1.89                     | (1.59, 2.21) | 1.90                     | (1.62, 2.20) |
| 2008110 | 2.84        | (2.43, 3.28) | 2.41        | (2.05, 2.79) | 6.17                     | (5.40, 6.99) | 5.03                     | (4.40, 5.70) | 2.30        | (1.96, 2.65) | 2.51        | (2.19, 2.86) | 2.00                     | (1.70, 2.34) | 2.09                     | (1.77, 2.43) |
| 2008043 | 1.85        | (1.62, 2.09) | 2.16        | (1.87, 2.46) | 5.03                     | (4.54, 5.54) | 4.61                     | (4.09, 5.16) | 2.01        | (1.78, 2.26) | 2.14        | (1.88, 2.42) | 2.01                     | (1.79, 2.25) | 1.78                     | (1.53, 2.05) |

| Family  | cohumulone  |              | cohumulone  |              | humulone + adhumulone |              | humulone + adhumulone |              | colupulone  |              | colupulone  |              | lupulone + adlupulone |              | lupulone + adlupulone |              |
|---------|-------------|--------------|-------------|--------------|-----------------------|--------------|-----------------------|--------------|-------------|--------------|-------------|--------------|-----------------------|--------------|-----------------------|--------------|
|         | 16 months * |              | 28 months * |              | 16 months *           |              | 28 months *           |              | 16 months * |              | 28 months * |              | 16 months *           |              | 28 months *           |              |
| 2008188 | 2.57        | (2.19, 3.00) | 2.43        | (2.07, 2.81) | 5.93                  | (5.18, 6.74) | 4.86                  | (4.24, 5.52) | 2.54        | (2.19, 2.92) | 2.60        | (2.28, 2.95) | 2.18                  | (1.86, 2.53) | 2.07                  | (1.75, 2.41) |
| 2008080 | 2.21        | (1.85, 2.60) | 2.28        | (1.93, 2.65) | 5.94                  | (5.19, 6.74) | 5.01                  | (4.38, 5.68) | 2.18        | (1.86, 2.53) | 2.29        | (1.98, 2.62) | 2.34                  | (2.01, 2.70) | 1.97                  | (1.66, 2.31) |
| 2008239 | 2.50        | (2.12, 2.91) | 2.49        | (2.16, 2.85) | 5.52                  | (4.79, 6.30) | 5.11                  | (4.53, 5.74) | 2.50        | (2.15, 2.87) | 2.78        | (2.46, 3.11) | 2.11                  | (1.80, 2.45) | 2.29                  | (1.98, 2.62) |
| 2008075 | 2.77        | (2.43, 3.13) | 2.27        | (1.97, 2.58) | 7.58                  | (6.86, 8.34) | 5.12                  | (4.57, 5.70) | 2.34        | (2.05, 2.65) | 2.45        | (2.17, 2.74) | 2.49                  | (2.20, 2.81) | 2.28                  | (2.00, 2.58) |
| 2008114 | 2.12        | (1.79, 2.46) | 2.01        | (1.72, 2.34) | 6.40                  | (5.69, 7.16) | 4.82                  | (4.25, 5.42) | 2.04        | (1.75, 2.35) | 2.42        | (2.12, 2.73) | 2.36                  | (2.05, 2.69) | 2.46                  | (2.15, 2.80) |
| 2008166 | 3.09        | (2.70, 3.50) | 2.27        | (1.95, 2.61) | 5.35                  | (4.70, 6.04) | 4.67                  | (4.11, 5.27) | 2.18        | (1.88, 2.50) | 2.18        | (1.90, 2.48) | 1.60                  | (1.35, 1.87) | 1.70                  | (1.44, 1.98) |
| 2008252 | 2.51        | (2.16, 2.88) | 2.17        | (1.86, 2.50) | 6.37                  | (5.65, 7.12) | 5.22                  | (4.62, 5.85) | 2.09        | (1.80, 2.40) | 2.31        | (2.02, 2.61) | 2.07                  | (1.78, 2.38) | 2.20                  | (1.90, 2.52) |
| 2008150 | 2.97        | (2.68, 3.28) | 2.45        | (2.09, 2.83) | 6.54                  | (5.98, 7.12) | 5.08                  | (4.45, 5.76) | 2.01        | (1.78, 2.25) | 2.40        | (2.09, 2.74) | 1.69                  | (1.48, 1.91) | 2.00                  | (1.69, 2.34) |
| 2008009 | 2.61        | (2.28, 2.96) | 2.39        | (2.08, 2.71) | 7.51                  | (6.79, 8.26) | 5.81                  | (5.22, 6.43) | 1.83        | (1.57, 2.10) | 2.11        | (1.85, 2.39) | 1.97                  | (1.71, 2.25) | 1.90                  | (1.65, 2.18) |
| 2008081 | 3.21        | (2.77, 3.68) | 2.72        | (2.34, 3.12) | 8.22                  | (7.33, 9.16) | 6.19                  | (5.49, 6.93) | 2.58        | (2.22, 2.96) | 2.59        | (2.26, 2.93) | 2.54                  | (2.19, 2.91) | 2.43                  | (2.08, 2.80) |
| 2008041 | 3.54        | (3.19, 3.92) | 2.41        | (2.11, 2.74) | 6.61                  | (5.98, 7.27) | 5.66                  | (5.08, 6.27) | 2.45        | (2.17, 2.74) | 2.29        | (2.02, 2.58) | 1.73                  | (1.50, 1.97) | 1.98                  | (1.72, 2.26) |
| 2008061 | 2.22        | (1.94, 2.53) | 2.36        | (2.01, 2.74) | 5.81                  | (5.22, 6.43) | 5.20                  | (4.56, 5.89) | 2.01        | (1.76, 2.28) | 2.37        | (2.06, 2.71) | 2.00                  | (1.75, 2.27) | 2.01                  | (1.70, 2.35) |
| 2008087 | 2.73        | (2.33, 3.16) | 2.68        | (2.31, 3.08) | 6.41                  | (5.62, 7.24) | 5.27                  | (4.62, 5.95) | 2.15        | (1.83, 2.50) | 2.64        | (2.31, 2.99) | 2.02                  | (1.71, 2.35) | 2.22                  | (1.89, 2.57) |
| 2008147 | 3.31        | (3.00, 3.64) | 2.74        | (2.41, 3.09) | 7.30                  | (6.71, 7.92) | 5.95                  | (5.36, 6.58) | 2.18        | (1.94, 2.43) | 2.61        | (2.32, 2.92) | 1.94                  | (1.72, 2.17) | 2.25                  | (1.97, 2.55) |
| 2008258 | 2.82        | (2.51, 3.13) | 2.43        | (2.10, 2.78) | 7.89                  | (7.25, 8.57) | 5.49                  | (4.88, 6.14) | 3.12        | (2.82, 3.44) | 3.17        | (2.84, 3.53) | 3.35                  | (3.05, 3.67) | 3.09                  | (2.73, 3.47) |
| 2008130 | 2.62        | (2.29, 2.97) | 2.74        | (2.39, 3.11) | 6.45                  | (5.79, 7.15) | 5.71                  | (5.08, 6.36) | 1.97        | (1.71, 2.25) | 2.38        | (2.08, 2.69) | 1.92                  | (1.67, 2.20) | 1.98                  | (1.70, 2.29) |
| 2008100 | 2.61        | (2.28, 2.96) | 2.53        | (2.17, 2.92) | 7.12                  | (6.42, 7.86) | 5.58                  | (4.91, 6.28) | 2.14        | (1.87, 2.44) | 2.71        | (2.38, 3.07) | 2.28                  | (2.00, 2.58) | 2.51                  | (2.16, 2.88) |
| 2008132 | 2.99        | (2.60, 3.40) | 2.27        | (1.92, 2.64) | 7.07                  | (6.32, 7.87) | 4.93                  | (4.31, 5.59) | 2.47        | (2.15, 2.81) | 2.45        | (2.13, 2.79) | 2.28                  | (1.98, 2.60) | 2.12                  | (1.80, 2.47) |
| 2008256 | 2.89        | (2.51, 3.30) | 2.14        | (1.81, 2.50) | 6.66                  | (5.93, 7.43) | 4.64                  | (4.04, 5.29) | 3.31        | (2.94, 3.70) | 3.01        | (2.66, 3.39) | 2.91                  | (2.56, 3.27) | 2.77                  | (2.40, 3.16) |
| 2008093 | 2.24        | (1.97, 2.53) | 2.17        | (1.88, 2.48) | 5.45                  | (4.92, 6.02) | 4.70                  | (4.18, 5.26) | 1.75        | (1.52, 1.99) | 2.18        | (1.92, 2.46) | 1.65                  | (1.44, 1.88) | 1.90                  | (1.65, 2.18) |
| 2008108 | 2.26        | (1.99, 2.55) | 2.14        | (1.83, 2.47) | 5.54                  | (5.00, 6.11) | 4.71                  | (4.15, 5.31) | 2.28        | (2.02, 2.55) | 2.36        | (2.07, 2.67) | 2.31                  | (2.06, 2.58) | 2.17                  | (1.87, 2.48) |
| 2008179 | 2.13        | (1.85, 2.42) | 2.29        | (1.97, 2.63) | 6.57                  | (5.94, 7.23) | 5.52                  | (4.91, 6.17) | 2.23        | (1.96, 2.51) | 2.47        | (2.17, 2.78) | 2.52                  | (2.24, 2.82) | 2.36                  | (2.05, 2.70) |
| 2008192 | 3.13        | (2.74, 3.55) | 2.20        | (1.87, 2.57) | 5.82                  | (5.14, 6.54) | 4.77                  | (4.16, 5.42) | 3.38        | (3.00, 3.77) | 2.48        | (2.16, 2.82) | 2.43                  | (2.12, 2.76) | 2.09                  | (1.77, 2.43) |
| 2008089 | 2.90        | (2.53, 3.30) | 2.46        | (2.13, 2.81) | 6.97                  | (6.22, 7.76) | 5.27                  | (4.67, 5.90) | 2.25        | (1.94, 2.57) | 2.35        | (2.06, 2.66) | 2.17                  | (1.88, 2.49) | 2.04                  | (1.75, 2.35) |
| 2008064 | 2.66        | (2.27, 3.09) | 2.35        | (2.00, 2.72) | 6.52                  | (5.73, 7.37) | 5.28                  | (4.64, 5.97) | 2.02        | (1.71, 2.36) | 2.34        | (2.03, 2.67) | 1.89                  | (1.60, 2.22) | 2.08                  | (1.76, 2.42) |
| 2008269 | 2.81        | (2.40, 3.25) | 2.40        | (2.01, 2.82) | 5.30                  | (4.59, 6.07) | 5.18                  | (4.48, 5.93) | 2.42        | (2.08, 2.79) | 2.43        | (2.09, 2.80) | 1.91                  | (1.61, 2.24) | 2.10                  | (1.74, 2.49) |
| 2008059 | 2.73        | (2.32, 3.17) | 2.38        | (2.05, 2.72) | 6.47                  | (5.68, 7.31) | 4.98                  | (4.40, 5.59) | 2.30        | (1.96, 2.66) | 2.61        | (2.30, 2.93) | 2.12                  | (1.81, 2.47) | 2.25                  | (1.94, 2.57) |
| 2008047 | 2.78        | (2.41, 3.18) | 2.46        | (2.13, 2.81) | 5.90                  | (5.21, 6.63) | 4.81                  | (4.24, 5.41) | 2.21        | (1.90, 2.53) | 2.27        | (1.99, 2.57) | 1.82                  | (1.55, 2.11) | 1.70                  | (1.43, 1.98) |
| 2008194 | 3.27        | (2.87, 3.70) | 2.27        | (1.95, 2.61) | 7.70                  | (6.91, 8.52) | 5.20                  | (4.60, 5.82) | 2.75        | (2.42, 3.11) | 2.47        | (2.17, 2.79) | 2.55                  | (2.23, 2.89) | 2.25                  | (1.95, 2.57) |
| 2008232 | 2.06        | (1.74, 2.40) | 2.03        | (1.73, 2.35) | 5.58                  | (4.91, 6.28) | 4.64                  | (4.08, 5.23) | 2.26        | (1.96, 2.59) | 2.61        | (2.30, 2.93) | 2.36                  | (2.05, 2.69) | 2.45                  | (2.14, 2.79) |
| 2008173 | 2.17        | (1.81, 2.56) | 2.33        | (2.01, 2.68) | 6.28                  | (5.50, 7.11) | 5.12                  | (4.53, 5.75) | 2.20        | (1.87, 2.55) | 2.39        | (2.10, 2.70) | 2.45                  | (2.11, 2.82) | 2.14                  | (1.84, 2.45) |
| 2008120 | 2.29        | (1.95, 2.65) | 2.47        | (2.14, 2.83) | 6.36                  | (5.65, 7.12) | 5.69                  | (5.07, 6.35) | 2.45        | (2.13, 2.79) | 2.72        | (2.40, 3.05) | 2.20                  | (1.91, 2.52) | 2.38                  | (2.07, 2.72) |
| 2008262 | 2.67        | (2.31, 3.05) | 2.31        | (1.96, 2.68) | 6.42                  | (5.70, 7.18) | 5.10                  | (4.46, 5.77) | 2.17        | (1.87, 2.49) | 2.40        | (2.09, 2.74) | 1.96                  | (1.68, 2.26) | 2.11                  | (1.79, 2.46) |
| 2008187 | 2.16        | (1.84, 2.51) | 2.11        | (1.80, 2.43) | 5.52                  | (4.86, 6.23) | 4.80                  | (4.23, 5.40) | 1.76        | (1.49, 2.05) | 2.16        | (1.88, 2.46) | 1.81                  | (1.54, 2.10) | 1.89                  | (1.61, 2.19) |
| 2008051 | 3.11        | (2.72, 3.53) | 2.54        | (2.18, 2.93) | 6.54                  | (5.82, 7.30) | 5.27                  | (4.62, 5.95) | 2.75        | (2.42, 3.11) | 2.58        | (2.25, 2.93) | 2.25                  | (1.95, 2.57) | 2.09                  | (1.77, 2.44) |



| Family  | cohumulone  |               | cohumulone  |               | humulone + adhumulone |               | humulone + adhumulone |               | colupulone  |               | colupulone  |               | lupulone + adlupulone |               | lupulone + adlupulone |               |
|---------|-------------|---------------|-------------|---------------|-----------------------|---------------|-----------------------|---------------|-------------|---------------|-------------|---------------|-----------------------|---------------|-----------------------|---------------|
|         | 16 months * |               | 28 months * |               | 16 months *           |               | 28 months *           |               | 16 months * |               | 28 months * |               | 16 months *           |               | 28 months *           |               |
| 2008198 | 2.36        | (2.03 , 2.73) | 2.23        | (1.92 , 2.57) | 5.38                  | (4.73 , 6.08) | 4.74                  | (4.17 , 5.34) | 2.04        | (1.75 , 2.35) | 2.19        | (1.91 , 2.49) | 1.74                  | (1.48 , 2.03) | 1.78                  | (1.51 , 2.07) |
| 2008054 | 1.89        | (1.65 , 2.15) | 2.20        | (1.91 , 2.51) | 4.87                  | (4.36 , 5.41) | 4.68                  | (4.15 , 5.23) | 1.60        | (1.39 , 1.83) | 2.36        | (2.09 , 2.65) | 1.57                  | (1.36 , 1.79) | 2.01                  | (1.75 , 2.30) |
| 2008244 | 2.64        | (2.33 , 2.97) | 2.49        | (2.16 , 2.85) | 6.81                  | (6.18 , 7.48) | 5.38                  | (4.78 , 6.02) | 2.26        | (1.99 , 2.55) | 2.66        | (2.35 , 2.99) | 2.05                  | (1.80 , 2.32) | 2.22                  | (1.92 , 2.54) |
| 2008177 | 2.66        | (2.26 , 3.09) | 2.13        | (1.82 , 2.46) | 6.41                  | (5.62 , 7.24) | 4.98                  | (4.40 , 5.60) | 2.20        | (1.88 , 2.56) | 2.45        | (2.15 , 2.76) | 2.08                  | (1.76 , 2.42) | 2.41                  | (2.10 , 2.75) |
| 2008117 | 3.07        | (2.71 , 3.45) | 2.70        | (2.38 , 3.04) | 5.84                  | (5.21 , 6.51) | 5.01                  | (4.46 , 5.58) | 2.26        | (1.98 , 2.57) | 2.52        | (2.24 , 2.82) | 1.68                  | (1.44 , 1.94) | 1.84                  | (1.59 , 2.11) |
| 2008016 | 2.14        | (1.88 , 2.42) | 2.59        | (2.25 , 2.95) | 5.79                  | (5.24 , 6.38) | 5.61                  | (4.99 , 6.26) | 2.29        | (2.03 , 2.56) | 2.60        | (2.29 , 2.92) | 2.46                  | (2.20 , 2.73) | 2.29                  | (1.99 , 2.62) |
| 2008267 | 2.41        | (2.07 , 2.78) | 2.53        | (2.19 , 2.89) | 6.83                  | (6.09 , 7.61) | 5.29                  | (4.69 , 5.92) | 2.06        | (1.77 , 2.37) | 2.32        | (2.03 , 2.63) | 2.13                  | (1.84 , 2.44) | 1.91                  | (1.63 , 2.21) |
| 2008040 | 3.20        | (2.76 , 3.67) | 2.41        | (2.06 , 2.79) | 7.26                  | (6.42 , 8.15) | 5.02                  | (4.39 , 5.69) | 2.38        | (2.04 , 2.75) | 2.28        | (1.97 , 2.61) | 2.14                  | (1.82 , 2.48) | 1.87                  | (1.57 , 2.20) |
| 2008218 | 2.95        | (2.62 , 3.29) | 2.70        | (2.36 , 3.07) | 7.94                  | (7.25 , 8.66) | 5.94                  | (5.30 , 6.61) | 2.22        | (1.96 , 2.51) | 2.39        | (2.10 , 2.70) | 2.23                  | (1.97 , 2.51) | 2.06                  | (1.77 , 2.37) |
| 2008070 | 2.64        | (2.28 , 3.02) | 1.94        | (1.62 , 2.28) | 6.38                  | (5.67 , 7.14) | 5.11                  | (4.47 , 5.78) | 2.53        | (2.20 , 2.87) | 2.03        | (1.74 , 2.34) | 2.50                  | (2.18 , 2.84) | 2.05                  | (1.74 , 2.39) |
| 2008102 | 3.29        | (2.85 , 3.76) | 2.47        | (2.14 , 2.83) | 7.20                  | (6.36 , 8.08) | 5.23                  | (4.64 , 5.86) | 2.50        | (2.15 , 2.88) | 2.52        | (2.22 , 2.84) | 2.29                  | (1.96 , 2.64) | 2.19                  | (1.89 , 2.51) |
| 2008078 | 2.93        | (2.51 , 3.38) | 2.43        | (2.07 , 2.81) | 7.58                  | (6.72 , 8.48) | 4.97                  | (4.34 , 5.64) | 2.41        | (2.07 , 2.78) | 2.57        | (2.24 , 2.91) | 2.38                  | (2.04 , 2.74) | 2.07                  | (1.75 , 2.41) |
| 2008074 | 2.52        | (2.22 , 2.84) | 2.59        | (2.27 , 2.92) | 6.47                  | (5.85 , 7.13) | 5.87                  | (5.28 , 6.49) | 1.94        | (1.69 , 2.20) | 2.27        | (2.00 , 2.55) | 2.04                  | (1.79 , 2.31) | 2.10                  | (1.83 , 2.39) |

f.

| Family  | $\alpha$ -acid |                | $\alpha$ -acid |               | $\beta$ -acid |               | $\beta$ -acid |               |
|---------|----------------|----------------|----------------|---------------|---------------|---------------|---------------|---------------|
|         | 16 months      |                | 28 months *    |               | 16 months *   |               | 28 months *   |               |
| 2008003 | 9.74           | (8.76 , 10.72) | 7.78           | (6.94 , 8.66) | 4.40          | (3.86 , 4.98) | 4.71          | (4.17 , 5.29) |
| 2008190 | 7.50           | (6.60 , 8.41)  | 6.97           | (6.18 , 7.82) | 3.85          | (3.37 , 4.36) | 4.42          | (3.89 , 4.98) |
| 2008209 | 10.58          | (9.50 , 11.66) | 7.95           | (7.10 , 8.85) | 4.22          | (3.65 , 4.84) | 4.62          | (4.08 , 5.19) |
| 2008151 | 10.24          | (9.16 , 11.32) | 8.06           | (7.21 , 8.97) | 4.65          | (4.04 , 5.29) | 4.86          | (4.31 , 5.44) |
| 2008039 | 8.58           | (7.50 , 9.66)  | 7.82           | (6.92 , 8.78) | 3.62          | (3.09 , 4.19) | 4.52          | (3.95 , 5.13) |
| 2008152 | 10.29          | (9.45 , 11.13) | 6.92           | (6.13 , 7.76) | 4.84          | (4.33 , 5.37) | 4.59          | (4.05 , 5.16) |
| 2008001 | 9.19           | (8.29 , 10.09) | 8.24           | (7.38 , 9.15) | 4.05          | (3.57 , 4.57) | 4.48          | (3.95 , 5.04) |
| 2008073 | 7.17           | (6.19 , 8.15)  | 7.22           | (6.35 , 8.14) | 3.80          | (3.30 , 4.34) | 4.33          | (3.77 , 4.92) |
| 2008168 | 9.70           | (8.62 , 10.78) | 6.92           | (6.13 , 7.76) | 5.15          | (4.51 , 5.83) | 4.62          | (4.08 , 5.19) |
| 2008161 | 9.82           | (8.85 , 10.80) | 7.51           | (6.74 , 8.33) | 4.22          | (3.69 , 4.79) | 4.82          | (4.30 , 5.36) |
| 2008290 | 9.75           | (8.85 , 10.66) | 7.86           | (7.01 , 8.75) | 4.04          | (3.55 , 4.56) | 4.31          | (3.79 , 4.86) |
| 2008208 | 9.60           | (8.52 , 10.68) | 7.54           | (6.72 , 8.41) | 4.18          | (3.61 , 4.80) | 4.56          | (4.03 , 5.13) |
| 2008251 | 8.92           | (7.84 , 10.00) | 7.28           | (6.47 , 8.14) | 4.65          | (4.05 , 5.30) | 4.56          | (4.03 , 5.13) |
| 2008052 | 7.85           | (7.00 , 8.69)  | 7.19           | (6.39 , 8.04) | 3.55          | (3.12 , 4.01) | 3.98          | (3.48 , 4.51) |

| Family  | $\alpha$ -acid |                 | $\alpha$ -acid |               | $\beta$ -acid |               | $\beta$ -acid |               |
|---------|----------------|-----------------|----------------|---------------|---------------|---------------|---------------|---------------|
|         | 16 months      |                 | 28 months *    |               | 16 months *   |               | 28 months *   |               |
| 2008037 | 7.56           | (6.58 , 8.54)   | 7.35           | (6.53 , 8.21) | 3.64          | (3.14 , 4.16) | 4.18          | (3.67 , 4.72) |
| 2008154 | 10.38          | (9.40 , 11.36)  | 8.58           | (7.70 , 9.51) | 4.64          | (4.08 , 5.23) | 4.76          | (4.21 , 5.34) |
| 2008136 | 10.32          | (9.53 , 11.11)  | 7.87           | (7.08 , 8.70) | 4.67          | (4.20 , 5.17) | 4.61          | (4.10 , 5.14) |
| 2008096 | 7.55           | (6.76 , 8.35)   | 7.26           | (6.45 , 8.12) | 3.85          | (3.42 , 4.30) | 4.23          | (3.71 , 4.77) |
| 2008071 | 9.74           | (8.89 , 10.58)  | 7.33           | (6.56 , 8.13) | 4.29          | (3.81 , 4.79) | 4.24          | (3.76 , 4.75) |
| 2008124 | 9.32           | (8.24 , 10.40)  | 7.41           | (6.53 , 8.34) | 4.48          | (3.89 , 5.12) | 4.33          | (3.77 , 4.93) |
| 2008145 | 10.75          | (10.00 , 11.50) | 8.22           | (7.41 , 9.08) | 4.95          | (4.49 , 5.43) | 4.67          | (4.17 , 5.21) |
| 2008084 | 8.26           | (7.42 , 9.10)   | 7.87           | (6.96 , 8.83) | 4.39          | (3.91 , 4.90) | 4.88          | (4.28 , 5.51) |
| 2008083 | 10.02          | (9.04 , 11.00)  | 8.42           | (7.55 , 9.34) | 4.56          | (4.01 , 5.15) | 4.39          | (3.87 , 4.95) |
| 2008056 | 8.73           | (7.75 , 9.71)   | 7.42           | (6.54 , 8.35) | 4.79          | (4.22 , 5.40) | 4.84          | (4.25 , 5.47) |
| 2008261 | 9.65           | (8.75 , 10.56)  | 7.78           | (6.94 , 8.67) | 4.44          | (3.93 , 4.99) | 4.46          | (3.93 , 5.02) |
| 2008157 | 9.01           | (7.93 , 10.09)  | 7.02           | (6.22 , 7.86) | 4.25          | (3.67 , 4.87) | 4.22          | (3.71 , 4.77) |
| 2008006 | 8.56           | (7.58 , 9.54)   | 8.32           | (7.46 , 9.24) | 4.48          | (3.93 , 5.06) | 4.58          | (4.05 , 5.15) |
| 2008240 | 8.82           | (7.98 , 9.66)   | 8.50           | (7.63 , 9.43) | 4.69          | (4.20 , 5.21) | 4.60          | (4.06 , 5.17) |
| 2008103 | 8.85           | (7.77 , 9.93)   | 8.28           | (7.47 , 9.14) | 4.18          | (3.61 , 4.79) | 4.91          | (4.39 , 5.46) |
| 2008148 | 9.18           | (8.33 , 10.02)  | 7.73           | (6.95 , 8.56) | 4.39          | (3.91 , 4.90) | 4.57          | (4.07 , 5.10) |
| 2008236 | 8.20           | (7.41 , 8.99)   | 6.99           | (6.20 , 7.83) | 3.79          | (3.36 , 4.23) | 4.18          | (3.67 , 4.73) |
| 2008259 | 8.68           | (7.60 , 9.76)   | 7.64           | (6.75 , 8.59) | 4.10          | (3.53 , 4.70) | 4.37          | (3.81 , 4.97) |
| 2008191 | 8.20           | (7.29 , 9.10)   | 7.06           | (6.31 , 7.85) | 4.02          | (3.54 , 4.54) | 4.32          | (3.84 , 4.84) |
| 2008242 | 7.67           | (6.76 , 8.57)   | 6.64           | (5.92 , 7.41) | 4.87          | (4.33 , 5.43) | 4.47          | (3.97 , 4.99) |
| 2008248 | 6.57           | (5.66 , 7.47)   | 7.08           | (6.28 , 7.92) | 3.71          | (3.24 , 4.20) | 4.27          | (3.76 , 4.82) |
| 2008010 | 9.10           | (8.19 , 10.00)  | 7.69           | (6.86 , 8.57) | 3.85          | (3.38 , 4.36) | 4.40          | (3.88 , 4.96) |
| 2008263 | 9.36           | (8.45 , 10.26)  | 7.90           | (7.05 , 8.79) | 4.50          | (3.99 , 5.05) | 4.69          | (4.15 , 5.26) |
| 2008153 | 9.62           | (8.82 , 10.41)  | 7.68           | (6.89 , 8.50) | 4.14          | (3.70 , 4.61) | 4.47          | (3.97 , 4.99) |
| 2008119 | 8.44           | (7.46 , 9.42)   | 7.30           | (6.49 , 8.16) | 3.85          | (3.34 , 4.39) | 4.24          | (3.73 , 4.79) |
| 2008206 | 9.08           | (8.17 , 9.98)   | 7.94           | (7.14 , 8.78) | 4.20          | (3.70 , 4.73) | 4.62          | (4.11 , 5.15) |
| 2008139 | 6.74           | (5.89 , 7.58)   | 6.69           | (5.92 , 7.52) | 4.79          | (4.29 , 5.33) | 4.43          | (3.91 , 4.99) |
| 2008106 | 8.32           | (7.42 , 9.23)   | 7.37           | (6.55 , 8.23) | 3.77          | (3.30 , 4.27) | 4.76          | (4.22 , 5.34) |
| 2008122 | 7.96           | (6.88 , 9.04)   | 8.02           | (7.17 , 8.92) | 4.51          | (3.92 , 5.15) | 4.85          | (4.30 , 5.44) |
| 2008155 | 8.41           | (7.50 , 9.31)   | 7.96           | (7.12 , 8.86) | 3.98          | (3.50 , 4.49) | 4.77          | (4.22 , 5.35) |
| 2008088 | 9.55           | (8.65 , 10.45)  | 8.68           | (7.79 , 9.61) | 4.49          | (3.98 , 5.04) | 4.98          | (4.43 , 5.58) |
| 2008111 | 8.70           | (7.62 , 9.78)   | 7.65           | (6.75 , 8.59) | 4.38          | (3.79 , 5.01) | 4.78          | (4.19 , 5.41) |
| 2008202 | 9.68           | (8.89 , 10.47)  | 7.82           | (6.98 , 8.71) | 4.06          | (3.62 , 4.52) | 4.49          | (3.96 , 5.05) |
| 2008013 | 8.22           | (7.32 , 9.12)   | 7.19           | (6.38 , 8.04) | 4.13          | (3.64 , 4.65) | 4.32          | (3.80 , 4.87) |
| 2008279 | 10.65          | (9.57 , 11.73)  | 7.40           | (6.52 , 8.33) | 4.73          | (4.12 , 5.38) | 4.33          | (3.77 , 4.92) |
| 2008007 | 9.69           | (8.71 , 10.66)  | 8.04           | (7.18 , 8.94) | 4.02          | (3.50 , 4.57) | 4.22          | (3.71 , 4.77) |

| Family  | $\alpha$ -acid |                 | $\alpha$ -acid |               | $\beta$ -acid |               | $\beta$ -acid |               |
|---------|----------------|-----------------|----------------|---------------|---------------|---------------|---------------|---------------|
|         | 16 months      |                 | 28 months *    |               | 16 months *   |               | 28 months *   |               |
| 2008090 | 10.23          | (9.39 , 11.07)  | 8.44           | (7.62 , 9.30) | 4.20          | (3.73 , 4.70) | 4.45          | (3.96 , 4.97) |
| 2008055 | 8.85           | (8.01 , 9.69)   | 7.24           | (6.43 , 8.09) | 4.98          | (4.46 , 5.52) | 4.70          | (4.15 , 5.27) |
| 2008271 | 9.19           | (8.35 , 10.03)  | 7.69           | (6.86 , 8.57) | 3.88          | (3.43 , 4.36) | 4.20          | (3.68 , 4.74) |
| 2008035 | 8.71           | (7.81 , 9.61)   | 7.73           | (6.90 , 8.62) | 4.17          | (3.68 , 4.70) | 4.55          | (4.02 , 5.12) |
| 2008212 | 8.29           | (7.31 , 9.27)   | 7.95           | (7.04 , 8.92) | 5.04          | (4.46 , 5.66) | 4.87          | (4.28 , 5.51) |
| 2008149 | 11.00          | (10.10 , 11.90) | 7.44           | (6.62 , 8.30) | 5.07          | (4.52 , 5.65) | 4.50          | (3.97 , 5.06) |
| 2008170 | 8.74           | (7.90 , 9.58)   | 7.84           | (7.00 , 8.73) | 3.99          | (3.54 , 4.48) | 4.11          | (3.60 , 4.64) |
| 2008247 | 8.61           | (7.53 , 9.69)   | 8.16           | (7.30 , 9.07) | 3.86          | (3.31 , 4.45) | 4.35          | (3.83 , 4.91) |
| 2008110 | 9.17           | (8.09 , 10.25)  | 7.48           | (6.60 , 8.42) | 4.33          | (3.75 , 4.95) | 4.63          | (4.05 , 5.24) |
| 2008043 | 7.10           | (6.35 , 7.85)   | 6.85           | (6.11 , 7.63) | 4.05          | (3.64 , 4.49) | 3.99          | (3.52 , 4.48) |
| 2008188 | 8.68           | (7.60 , 9.76)   | 7.36           | (6.48 , 8.29) | 4.73          | (4.12 , 5.38) | 4.72          | (4.14 , 5.34) |
| 2008080 | 8.33           | (7.25 , 9.41)   | 7.35           | (6.47 , 8.28) | 4.53          | (3.94 , 5.17) | 4.30          | (3.75 , 4.90) |
| 2008239 | 8.25           | (7.17 , 9.33)   | 7.64           | (6.81 , 8.52) | 4.62          | (4.02 , 5.27) | 5.06          | (4.50 , 5.66) |
| 2008075 | 10.53          | (9.63 , 11.44)  | 7.43           | (6.66 , 8.24) | 4.82          | (4.29 , 5.38) | 4.71          | (4.20 , 5.25) |
| 2008114 | 8.74           | (7.76 , 9.73)   | 6.94           | (6.15 , 7.77) | 4.42          | (3.87 , 5.00) | 4.83          | (4.28 , 5.41) |
| 2008166 | 8.57           | (7.59 , 9.55)   | 7.02           | (6.23 , 7.87) | 3.84          | (3.34 , 4.39) | 3.98          | (3.48 , 4.51) |
| 2008252 | 9.11           | (8.14 , 10.09)  | 7.44           | (6.62 , 8.31) | 4.18          | (3.66 , 4.75) | 4.50          | (3.97 , 5.07) |
| 2008150 | 9.65           | (8.90 , 10.40)  | 7.56           | (6.68 , 8.51) | 3.73          | (3.33 , 4.16) | 4.44          | (3.87 , 5.04) |
| 2008009 | 10.31          | (9.40 , 11.21)  | 8.18           | (7.38 , 9.04) | 3.84          | (3.37 , 4.35) | 4.06          | (3.59 , 4.56) |
| 2008081 | 11.79          | (10.71 , 12.87) | 8.81           | (7.85 , 9.82) | 5.08          | (4.45 , 5.76) | 4.96          | (4.36 , 5.60) |
| 2008041 | 10.41          | (9.57 , 11.25)  | 8.08           | (7.28 , 8.93) | 4.22          | (3.75 , 4.72) | 4.31          | (3.82 , 4.82) |
| 2008061 | 8.23           | (7.39 , 9.07)   | 7.60           | (6.71 , 8.55) | 4.04          | (3.58 , 4.53) | 4.42          | (3.86 , 5.02) |
| 2008087 | 9.36           | (8.28 , 10.44)  | 7.95           | (7.04 , 8.91) | 4.20          | (3.63 , 4.82) | 4.85          | (4.26 , 5.48) |
| 2008147 | 10.76          | (10.01 , 11.51) | 8.63           | (7.80 , 9.50) | 4.14          | (3.71 , 4.58) | 4.85          | (4.33 , 5.40) |
| 2008258 | 11.04          | (10.25 , 11.84) | 7.92           | (7.08 , 8.82) | 6.40          | (5.85 , 6.98) | 6.09          | (5.47 , 6.74) |
| 2008130 | 9.30           | (8.39 , 10.20)  | 8.40           | (7.52 , 9.32) | 3.93          | (3.45 , 4.43) | 4.40          | (3.88 , 4.96) |
| 2008100 | 10.00          | (9.09 , 10.90)  | 8.08           | (7.17 , 9.06) | 4.43          | (3.92 , 4.98) | 5.15          | (4.54 , 5.80) |
| 2008132 | 10.25          | (9.27 , 11.23)  | 7.27           | (6.40 , 8.19) | 4.74          | (4.17 , 5.34) | 4.58          | (4.00 , 5.19) |
| 2008256 | 9.77           | (8.79 , 10.75)  | 6.89           | (6.04 , 7.79) | 6.16          | (5.51 , 6.84) | 5.65          | (5.01 , 6.33) |
| 2008093 | 7.92           | (7.13 , 8.71)   | 6.96           | (6.21 , 7.74) | 3.44          | (3.04 , 3.87) | 4.13          | (3.65 , 4.63) |
| 2008108 | 8.14           | (7.35 , 8.93)   | 6.94           | (6.15 , 7.78) | 4.60          | (4.13 , 5.09) | 4.53          | (4.00 , 5.09) |
| 2008179 | 8.88           | (8.03 , 9.72)   | 7.84           | (7.00 , 8.73) | 4.75          | (4.25 , 5.27) | 4.79          | (4.25 , 5.37) |
| 2008192 | 9.10           | (8.12 , 10.08)  | 7.06           | (6.21 , 7.97) | 5.81          | (5.18 , 6.47) | 4.59          | (4.01 , 5.20) |
| 2008089 | 10.09          | (9.11 , 11.07)  | 7.74           | (6.90 , 8.62) | 4.43          | (3.88 , 5.01) | 4.41          | (3.88 , 4.96) |
| 2008064 | 9.40           | (8.32 , 10.48)  | 7.66           | (6.77 , 8.61) | 3.96          | (3.41 , 4.56) | 4.44          | (3.87 , 5.04) |
| 2008269 | 8.55           | (7.47 , 9.63)   | 7.61           | (6.65 , 8.65) | 4.38          | (3.80 , 5.01) | 4.54          | (3.92 , 5.21) |

| Family  | $\alpha$ -acid |                 | $\alpha$ -acid |               | $\beta$ -acid |               | $\beta$ -acid |               |
|---------|----------------|-----------------|----------------|---------------|---------------|---------------|---------------|---------------|
|         | 16 months      |                 | 28 months *    |               | 16 months *   |               | 28 months *   |               |
| 2008059 | 9.38           | (8.29 , 10.46)  | 7.40           | (6.58 , 8.27) | 4.44          | (3.85 , 5.07) | 4.85          | (4.30 , 5.43) |
| 2008047 | 8.81           | (7.82 , 9.79)   | 7.33           | (6.51 , 8.19) | 4.07          | (3.54 , 4.63) | 4.06          | (3.56 , 4.60) |
| 2008194 | 11.39          | (10.41 , 12.36) | 7.51           | (6.68 , 8.38) | 5.29          | (4.69 , 5.92) | 4.71          | (4.16 , 5.28) |
| 2008232 | 7.86           | (6.88 , 8.83)   | 6.77           | (5.99 , 7.60) | 4.62          | (4.06 , 5.21) | 5.01          | (4.45 , 5.60) |
| 2008173 | 8.67           | (7.58 , 9.75)   | 7.50           | (6.68 , 8.38) | 4.65          | (4.04 , 5.30) | 4.54          | (4.00 , 5.10) |
| 2008120 | 8.80           | (7.82 , 9.78)   | 8.15           | (7.29 , 9.06) | 4.66          | (4.09 , 5.26) | 5.07          | (4.50 , 5.66) |
| 2008262 | 9.42           | (8.44 , 10.40)  | 7.45           | (6.57 , 8.39) | 4.16          | (3.63 , 4.72) | 4.53          | (3.96 , 5.14) |
| 2008187 | 8.12           | (7.14 , 9.10)   | 6.99           | (6.19 , 7.83) | 3.61          | (3.12 , 4.14) | 4.10          | (3.59 , 4.63) |
| 2008051 | 9.94           | (8.96 , 10.92)  | 7.81           | (6.91 , 8.77) | 5.01          | (4.43 , 5.63) | 4.70          | (4.12 , 5.32) |
| 2008198 | 7.98           | (7.00 , 8.95)   | 7.06           | (6.26 , 7.90) | 3.84          | (3.33 , 4.38) | 4.05          | (3.55 , 4.59) |
| 2008054 | 7.04           | (6.25 , 7.84)   | 6.95           | (6.21 , 7.74) | 3.22          | (2.83 , 3.63) | 4.40          | (3.91 , 4.92) |
| 2008244 | 9.62           | (8.77 , 10.46)  | 7.88           | (7.03 , 8.77) | 4.33          | (3.86 , 4.84) | 4.88          | (4.33 , 5.47) |
| 2008177 | 9.23           | (8.15 , 10.32)  | 7.19           | (6.38 , 8.04) | 4.31          | (3.73 , 4.94) | 4.82          | (4.27 , 5.40) |
| 2008117 | 9.15           | (8.25 , 10.06)  | 7.75           | (6.96 , 8.57) | 4.01          | (3.53 , 4.53) | 4.43          | (3.94 , 4.96) |
| 2008016 | 8.14           | (7.35 , 8.94)   | 8.17           | (7.31 , 9.08) | 4.74          | (4.27 , 5.24) | 4.87          | (4.32 , 5.46) |
| 2008267 | 9.47           | (8.49 , 10.45)  | 7.82           | (6.98 , 8.71) | 4.20          | (3.67 , 4.77) | 4.28          | (3.76 , 4.82) |
| 2008040 | 10.73          | (9.65 , 11.81)  | 7.48           | (6.60 , 8.42) | 4.54          | (3.94 , 5.18) | 4.22          | (3.67 , 4.81) |
| 2008218 | 11.13          | (10.29 , 11.97) | 8.58           | (7.69 , 9.51) | 4.46          | (3.98 , 4.97) | 4.46          | (3.93 , 5.02) |
| 2008070 | 9.32           | (8.34 , 10.30)  | 7.20           | (6.34 , 8.12) | 5.07          | (4.48 , 5.69) | 4.14          | (3.60 , 4.73) |
| 2008102 | 10.77          | (9.69 , 11.85)  | 7.72           | (6.88 , 8.60) | 4.80          | (4.19 , 5.46) | 4.72          | (4.18 , 5.29) |
| 2008078 | 10.84          | (9.76 , 11.92)  | 7.45           | (6.57 , 8.39) | 4.78          | (4.17 , 5.43) | 4.67          | (4.09 , 5.29) |
| 2008074 | 9.17           | (8.33 , 10.01)  | 8.41           | (7.59 , 9.27) | 4.01          | (3.55 , 4.49) | 4.39          | (3.89 , 4.91) |

g.

| Family  | cohumulone<br>(% of $\alpha$ -acid) |               | cohumulone<br>(% of $\alpha$ -acid) |               | $\alpha$ -acid: $\beta$ -acid |               | $\alpha$ -acid: $\beta$ -acid |               | $\alpha$ -acid:total resin |               | $\alpha$ -acid:total resin |               |
|---------|-------------------------------------|---------------|-------------------------------------|---------------|-------------------------------|---------------|-------------------------------|---------------|----------------------------|---------------|----------------------------|---------------|
|         | 16 months *                         |               | 28 months *                         |               | 16 months *                   |               | 28 months *                   |               | 16 months *                |               | 28 months *                |               |
| 2008003 | 0.31                                | (0.28 , 0.33) | 0.33                                | (0.31 , 0.36) | 2.29                          | (2.03 , 2.55) | 1.78                          | (1.55 , 2.01) | 0.68                       | (0.65 , 0.71) | 0.62                       | (0.58 , 0.66) |
| 2008190 | 0.28                                | (0.25 , 0.30) | 0.29                                | (0.27 , 0.32) | 2.04                          | (1.81 , 2.27) | 1.61                          | (1.39 , 1.84) | 0.66                       | (0.63 , 0.69) | 0.60                       | (0.56 , 0.63) |
| 2008209 | 0.30                                | (0.27 , 0.32) | 0.32                                | (0.30 , 0.35) | 2.43                          | (2.15 , 2.73) | 1.80                          | (1.57 , 2.03) | 0.70                       | (0.66 , 0.73) | 0.63                       | (0.59 , 0.67) |
| 2008151 | 0.29                                | (0.26 , 0.32) | 0.29                                | (0.27 , 0.32) | 2.16                          | (1.90 , 2.44) | 1.73                          | (1.50 , 1.96) | 0.67                       | (0.64 , 0.71) | 0.62                       | (0.58 , 0.66) |
| 2008039 | 0.33                                | (0.30 , 0.36) | 0.31                                | (0.28 , 0.34) | 2.47                          | (2.18 , 2.77) | 1.83                          | (1.58 , 2.09) | 0.70                       | (0.67 , 0.73) | 0.63                       | (0.59 , 0.67) |

| Family  | cohumulone<br>(% of $\alpha$ -acid) |               | cohumulone<br>(% of $\alpha$ -acid) |               | $\alpha$ -acid: $\beta$ -acid |               | $\alpha$ -acid: $\beta$ -acid |               | $\alpha$ -acid:total resin |               | $\alpha$ -acid:total resin |               |
|---------|-------------------------------------|---------------|-------------------------------------|---------------|-------------------------------|---------------|-------------------------------|---------------|----------------------------|---------------|----------------------------|---------------|
|         | 16 months *                         |               | 28 months *                         |               | 16 months *                   |               | 28 months *                   |               | 16 months *                |               | 28 months *                |               |
| 2008152 | 0.27                                | (0.25 , 0.29) | 0.30                                | (0.28 , 0.33) | 2.11                          | (1.90 , 2.34) | 1.54                          | (1.32 , 1.77) | 0.67                       | (0.64 , 0.69) | 0.59                       | (0.55 , 0.62) |
| 2008001 | 0.30                                | (0.28 , 0.33) | 0.30                                | (0.28 , 0.33) | 2.29                          | (2.05 , 2.54) | 1.97                          | (1.73 , 2.21) | 0.69                       | (0.66 , 0.71) | 0.65                       | (0.61 , 0.69) |
| 2008073 | 0.30                                | (0.27 , 0.32) | 0.32                                | (0.30 , 0.35) | 1.95                          | (1.72 , 2.20) | 1.74                          | (1.49 , 1.99) | 0.65                       | (0.62 , 0.68) | 0.62                       | (0.58 , 0.66) |
| 2008168 | 0.28                                | (0.25 , 0.30) | 0.31                                | (0.28 , 0.33) | 1.95                          | (1.70 , 2.21) | 1.59                          | (1.37 , 1.82) | 0.64                       | (0.61 , 0.67) | 0.58                       | (0.54 , 0.61) |
| 2008161 | 0.27                                | (0.25 , 0.30) | 0.29                                | (0.27 , 0.31) | 2.32                          | (2.06 , 2.59) | 1.63                          | (1.42 , 1.84) | 0.69                       | (0.66 , 0.72) | 0.59                       | (0.56 , 0.62) |
| 2008290 | 0.27                                | (0.25 , 0.29) | 0.30                                | (0.27 , 0.32) | 2.45                          | (2.20 , 2.71) | 1.93                          | (1.70 , 2.17) | 0.70                       | (0.67 , 0.73) | 0.64                       | (0.61 , 0.68) |
| 2008208 | 0.28                                | (0.25 , 0.30) | 0.28                                | (0.26 , 0.31) | 2.34                          | (2.06 , 2.63) | 1.71                          | (1.48 , 1.94) | 0.69                       | (0.66 , 0.72) | 0.61                       | (0.58 , 0.65) |
| 2008251 | 0.28                                | (0.26 , 0.31) | 0.29                                | (0.27 , 0.32) | 1.97                          | (1.72 , 2.24) | 1.63                          | (1.41 , 1.86) | 0.65                       | (0.62 , 0.68) | 0.61                       | (0.57 , 0.64) |
| 2008052 | 0.29                                | (0.27 , 0.31) | 0.33                                | (0.30 , 0.35) | 2.32                          | (2.09 , 2.56) | 1.95                          | (1.72 , 2.19) | 0.69                       | (0.66 , 0.71) | 0.65                       | (0.61 , 0.68) |
| 2008037 | 0.26                                | (0.24 , 0.28) | 0.28                                | (0.25 , 0.30) | 2.13                          | (1.89 , 2.39) | 1.85                          | (1.62 , 2.09) | 0.67                       | (0.64 , 0.70) | 0.64                       | (0.60 , 0.68) |
| 2008154 | 0.33                                | (0.31 , 0.36) | 0.37                                | (0.35 , 0.40) | 2.24                          | (1.99 , 2.51) | 1.89                          | (1.66 , 2.13) | 0.68                       | (0.65 , 0.71) | 0.64                       | (0.60 , 0.68) |
| 2008136 | 0.28                                | (0.26 , 0.30) | 0.31                                | (0.29 , 0.34) | 2.21                          | (2.00 , 2.43) | 1.77                          | (1.56 , 1.98) | 0.68                       | (0.66 , 0.71) | 0.63                       | (0.59 , 0.66) |
| 2008096 | 0.31                                | (0.29 , 0.33) | 0.32                                | (0.30 , 0.35) | 1.99                          | (1.80 , 2.20) | 1.83                          | (1.60 , 2.07) | 0.66                       | (0.63 , 0.68) | 0.63                       | (0.60 , 0.67) |
| 2008071 | 0.29                                | (0.27 , 0.31) | 0.31                                | (0.29 , 0.33) | 2.31                          | (2.09 , 2.55) | 1.81                          | (1.60 , 2.03) | 0.69                       | (0.66 , 0.71) | 0.63                       | (0.60 , 0.67) |
| 2008124 | 0.29                                | (0.26 , 0.31) | 0.32                                | (0.29 , 0.35) | 2.14                          | (1.88 , 2.42) | 1.80                          | (1.55 , 2.06) | 0.67                       | (0.64 , 0.70) | 0.63                       | (0.59 , 0.67) |
| 2008145 | 0.30                                | (0.28 , 0.32) | 0.31                                | (0.29 , 0.33) | 2.15                          | (1.95 , 2.36) | 1.83                          | (1.62 , 2.05) | 0.67                       | (0.65 , 0.70) | 0.64                       | (0.60 , 0.67) |
| 2008084 | 0.27                                | (0.25 , 0.29) | 0.31                                | (0.28 , 0.34) | 1.99                          | (1.78 , 2.20) | 1.69                          | (1.44 , 1.94) | 0.65                       | (0.62 , 0.67) | 0.61                       | (0.57 , 0.65) |
| 2008083 | 0.28                                | (0.25 , 0.30) | 0.31                                | (0.28 , 0.33) | 2.18                          | (1.93 , 2.44) | 2.08                          | (1.84 , 2.33) | 0.68                       | (0.65 , 0.71) | 0.66                       | (0.62 , 0.70) |
| 2008056 | 0.29                                | (0.26 , 0.31) | 0.31                                | (0.28 , 0.33) | 1.89                          | (1.66 , 2.13) | 1.59                          | (1.35 , 1.85) | 0.64                       | (0.61 , 0.67) | 0.59                       | (0.55 , 0.63) |
| 2008261 | 0.31                                | (0.29 , 0.33) | 0.32                                | (0.30 , 0.35) | 2.19                          | (1.95 , 2.43) | 1.82                          | (1.59 , 2.05) | 0.68                       | (0.65 , 0.71) | 0.63                       | (0.60 , 0.67) |
| 2008157 | 0.29                                | (0.27 , 0.32) | 0.32                                | (0.30 , 0.35) | 2.18                          | (1.92 , 2.47) | 1.72                          | (1.49 , 1.95) | 0.67                       | (0.64 , 0.71) | 0.62                       | (0.59 , 0.66) |
| 2008006 | 0.27                                | (0.25 , 0.30) | 0.33                                | (0.31 , 0.36) | 1.93                          | (1.69 , 2.17) | 1.96                          | (1.73 , 2.21) | 0.65                       | (0.62 , 0.68) | 0.64                       | (0.61 , 0.68) |
| 2008240 | 0.32                                | (0.30 , 0.34) | 0.32                                | (0.29 , 0.34) | 1.93                          | (1.73 , 2.15) | 1.98                          | (1.74 , 2.22) | 0.64                       | (0.61 , 0.66) | 0.65                       | (0.61 , 0.69) |
| 2008103 | 0.26                                | (0.24 , 0.29) | 0.30                                | (0.28 , 0.33) | 2.17                          | (1.90 , 2.45) | 1.73                          | (1.52 , 1.95) | 0.67                       | (0.64 , 0.71) | 0.62                       | (0.59 , 0.66) |
| 2008148 | 0.31                                | (0.28 , 0.33) | 0.33                                | (0.31 , 0.36) | 2.13                          | (1.91 , 2.36) | 1.80                          | (1.59 , 2.02) | 0.66                       | (0.63 , 0.68) | 0.61                       | (0.58 , 0.65) |
| 2008236 | 0.36                                | (0.34 , 0.38) | 0.36                                | (0.34 , 0.39) | 2.20                          | (2.00 , 2.42) | 1.70                          | (1.48 , 1.94) | 0.68                       | (0.66 , 0.70) | 0.61                       | (0.58 , 0.65) |
| 2008259 | 0.29                                | (0.26 , 0.32) | 0.31                                | (0.28 , 0.34) | 2.16                          | (1.90 , 2.44) | 1.86                          | (1.61 , 2.12) | 0.67                       | (0.64 , 0.71) | 0.64                       | (0.59 , 0.68) |
| 2008191 | 0.38                                | (0.35 , 0.41) | 0.39                                | (0.37 , 0.42) | 2.09                          | (1.86 , 2.33) | 1.69                          | (1.48 , 1.90) | 0.67                       | (0.64 , 0.69) | 0.62                       | (0.58 , 0.65) |
| 2008242 | 0.31                                | (0.29 , 0.34) | 0.30                                | (0.28 , 0.32) | 1.69                          | (1.49 , 1.90) | 1.51                          | (1.31 , 1.72) | 0.61                       | (0.58 , 0.64) | 0.58                       | (0.55 , 0.61) |
| 2008248 | 0.26                                | (0.24 , 0.28) | 0.27                                | (0.25 , 0.30) | 1.88                          | (1.66 , 2.10) | 1.76                          | (1.53 , 2.00) | 0.63                       | (0.61 , 0.66) | 0.61                       | (0.57 , 0.64) |
| 2008010 | 0.28                                | (0.26 , 0.30) | 0.34                                | (0.31 , 0.36) | 2.43                          | (2.18 , 2.68) | 1.87                          | (1.64 , 2.11) | 0.70                       | (0.67 , 0.73) | 0.64                       | (0.60 , 0.67) |
| 2008263 | 0.28                                | (0.25 , 0.30) | 0.32                                | (0.30 , 0.35) | 2.11                          | (1.88 , 2.35) | 1.76                          | (1.53 , 1.99) | 0.67                       | (0.64 , 0.70) | 0.63                       | (0.59 , 0.66) |
| 2008153 | 0.28                                | (0.26 , 0.30) | 0.31                                | (0.29 , 0.33) | 2.34                          | (2.13 , 2.57) | 1.79                          | (1.58 , 2.01) | 0.69                       | (0.67 , 0.72) | 0.63                       | (0.60 , 0.67) |
| 2008119 | 0.30                                | (0.27 , 0.32) | 0.32                                | (0.29 , 0.34) | 2.29                          | (2.03 , 2.55) | 1.79                          | (1.56 , 2.03) | 0.69                       | (0.66 , 0.72) | 0.63                       | (0.59 , 0.67) |
| 2008206 | 0.34                                | (0.31 , 0.36) | 0.33                                | (0.31 , 0.36) | 2.22                          | (1.99 , 2.47) | 1.79                          | (1.58 , 2.01) | 0.68                       | (0.65 , 0.71) | 0.63                       | (0.60 , 0.66) |
| 2008139 | 0.28                                | (0.26 , 0.30) | 0.30                                | (0.28 , 0.33) | 1.53                          | (1.35 , 1.72) | 1.53                          | (1.31 , 1.76) | 0.57                       | (0.55 , 0.60) | 0.58                       | (0.55 , 0.62) |

| Family  | cohumulone<br>(% of $\alpha$ -acid) |               | cohumulone<br>(% of $\alpha$ -acid) |               | $\alpha$ -acid: $\beta$ -acid |               | $\alpha$ -acid: $\beta$ -acid |               | $\alpha$ -acid:total resin |               | $\alpha$ -acid:total resin |               |
|---------|-------------------------------------|---------------|-------------------------------------|---------------|-------------------------------|---------------|-------------------------------|---------------|----------------------------|---------------|----------------------------|---------------|
|         | 16 months *                         |               | 28 months *                         |               | 16 months *                   |               | 28 months *                   |               | 16 months *                |               | 28 months *                |               |
| 2008106 | 0.29                                | (0.27 , 0.31) | 0.32                                | (0.29 , 0.34) | 2.26                          | (2.02 , 2.51) | 1.59                          | (1.37 , 1.82) | 0.69                       | (0.66 , 0.71) | 0.59                       | (0.56 , 0.63) |
| 2008122 | 0.31                                | (0.28 , 0.34) | 0.32                                | (0.29 , 0.34) | 1.85                          | (1.60 , 2.11) | 1.76                          | (1.54 , 2.00) | 0.63                       | (0.60 , 0.66) | 0.61                       | (0.58 , 0.65) |
| 2008155 | 0.36                                | (0.33 , 0.38) | 0.33                                | (0.30 , 0.35) | 2.20                          | (1.96 , 2.44) | 1.74                          | (1.52 , 1.98) | 0.68                       | (0.65 , 0.70) | 0.62                       | (0.58 , 0.66) |
| 2008088 | 0.29                                | (0.26 , 0.31) | 0.32                                | (0.30 , 0.35) | 2.13                          | (1.90 , 2.37) | 1.81                          | (1.58 , 2.05) | 0.67                       | (0.64 , 0.70) | 0.63                       | (0.59 , 0.67) |
| 2008111 | 0.27                                | (0.25 , 0.30) | 0.30                                | (0.27 , 0.33) | 2.02                          | (1.77 , 2.30) | 1.66                          | (1.42 , 1.92) | 0.66                       | (0.63 , 0.69) | 0.61                       | (0.57 , 0.65) |
| 2008202 | 0.33                                | (0.31 , 0.35) | 0.35                                | (0.32 , 0.37) | 2.38                          | (2.17 , 2.61) | 1.82                          | (1.59 , 2.05) | 0.70                       | (0.67 , 0.72) | 0.63                       | (0.59 , 0.67) |
| 2008013 | 0.25                                | (0.23 , 0.28) | 0.29                                | (0.26 , 0.31) | 2.11                          | (1.89 , 2.35) | 1.75                          | (1.52 , 1.99) | 0.66                       | (0.63 , 0.69) | 0.61                       | (0.57 , 0.65) |
| 2008279 | 0.31                                | (0.29 , 0.34) | 0.34                                | (0.31 , 0.37) | 2.20                          | (1.93 , 2.48) | 1.79                          | (1.54 , 2.05) | 0.68                       | (0.65 , 0.71) | 0.63                       | (0.59 , 0.67) |
| 2008007 | 0.31                                | (0.29 , 0.34) | 0.33                                | (0.30 , 0.35) | 2.46                          | (2.20 , 2.74) | 2.10                          | (1.86 , 2.35) | 0.70                       | (0.67 , 0.73) | 0.66                       | (0.62 , 0.70) |
| 2008090 | 0.32                                | (0.30 , 0.34) | 0.33                                | (0.30 , 0.35) | 2.39                          | (2.16 , 2.63) | 2.02                          | (1.80 , 2.24) | 0.70                       | (0.67 , 0.72) | 0.66                       | (0.62 , 0.69) |
| 2008055 | 0.27                                | (0.25 , 0.29) | 0.30                                | (0.28 , 0.33) | 1.82                          | (1.63 , 2.03) | 1.59                          | (1.37 , 1.82) | 0.63                       | (0.60 , 0.65) | 0.59                       | (0.55 , 0.62) |
| 2008271 | 0.30                                | (0.28 , 0.32) | 0.33                                | (0.30 , 0.35) | 2.41                          | (2.18 , 2.65) | 1.98                          | (1.75 , 2.23) | 0.69                       | (0.67 , 0.72) | 0.65                       | (0.61 , 0.69) |
| 2008035 | 0.28                                | (0.26 , 0.30) | 0.31                                | (0.28 , 0.33) | 2.07                          | (1.85 , 2.31) | 1.78                          | (1.55 , 2.02) | 0.66                       | (0.63 , 0.69) | 0.63                       | (0.59 , 0.66) |
| 2008212 | 0.29                                | (0.27 , 0.32) | 0.32                                | (0.29 , 0.35) | 1.73                          | (1.51 , 1.97) | 1.70                          | (1.46 , 1.96) | 0.61                       | (0.58 , 0.64) | 0.61                       | (0.57 , 0.65) |
| 2008149 | 0.36                                | (0.33 , 0.38) | 0.33                                | (0.31 , 0.36) | 2.15                          | (1.92 , 2.39) | 1.71                          | (1.48 , 1.94) | 0.67                       | (0.65 , 0.70) | 0.61                       | (0.58 , 0.65) |
| 2008170 | 0.27                                | (0.25 , 0.29) | 0.31                                | (0.28 , 0.33) | 2.29                          | (2.06 , 2.52) | 2.09                          | (1.85 , 2.33) | 0.68                       | (0.66 , 0.71) | 0.66                       | (0.62 , 0.70) |
| 2008247 | 0.27                                | (0.25 , 0.30) | 0.34                                | (0.31 , 0.37) | 2.28                          | (2.01 , 2.57) | 2.03                          | (1.79 , 2.27) | 0.69                       | (0.65 , 0.72) | 0.65                       | (0.62 , 0.69) |
| 2008110 | 0.31                                | (0.28 , 0.34) | 0.33                                | (0.30 , 0.36) | 2.18                          | (1.91 , 2.46) | 1.68                          | (1.44 , 1.94) | 0.67                       | (0.64 , 0.71) | 0.61                       | (0.57 , 0.65) |
| 2008043 | 0.27                                | (0.25 , 0.29) | 0.32                                | (0.30 , 0.34) | 1.84                          | (1.66 , 2.04) | 1.79                          | (1.58 , 2.01) | 0.63                       | (0.61 , 0.66) | 0.63                       | (0.60 , 0.67) |
| 2008188 | 0.30                                | (0.27 , 0.33) | 0.35                                | (0.32 , 0.38) | 1.89                          | (1.65 , 2.16) | 1.62                          | (1.38 , 1.88) | 0.64                       | (0.61 , 0.67) | 0.60                       | (0.56 , 0.64) |
| 2008080 | 0.27                                | (0.25 , 0.30) | 0.31                                | (0.28 , 0.34) | 1.96                          | (1.71 , 2.23) | 1.80                          | (1.55 , 2.06) | 0.64                       | (0.61 , 0.67) | 0.63                       | (0.59 , 0.67) |
| 2008239 | 0.31                                | (0.29 , 0.34) | 0.34                                | (0.31 , 0.36) | 1.86                          | (1.62 , 2.13) | 1.56                          | (1.34 , 1.78) | 0.63                       | (0.60 , 0.66) | 0.58                       | (0.55 , 0.62) |
| 2008075 | 0.27                                | (0.25 , 0.29) | 0.30                                | (0.28 , 0.33) | 2.15                          | (1.92 , 2.39) | 1.62                          | (1.42 , 1.84) | 0.68                       | (0.65 , 0.70) | 0.60                       | (0.57 , 0.64) |
| 2008114 | 0.25                                | (0.23 , 0.27) | 0.28                                | (0.26 , 0.31) | 2.08                          | (1.84 , 2.33) | 1.47                          | (1.25 , 1.69) | 0.66                       | (0.63 , 0.69) | 0.57                       | (0.53 , 0.60) |
| 2008166 | 0.36                                | (0.33 , 0.39) | 0.33                                | (0.31 , 0.36) | 2.33                          | (2.07 , 2.60) | 1.93                          | (1.70 , 2.17) | 0.69                       | (0.66 , 0.72) | 0.64                       | (0.60 , 0.68) |
| 2008252 | 0.28                                | (0.26 , 0.30) | 0.28                                | (0.26 , 0.31) | 2.27                          | (2.02 , 2.53) | 1.75                          | (1.52 , 1.99) | 0.67                       | (0.64 , 0.70) | 0.61                       | (0.58 , 0.65) |
| 2008150 | 0.31                                | (0.29 , 0.33) | 0.33                                | (0.30 , 0.36) | 2.59                          | (2.38 , 2.82) | 1.79                          | (1.54 , 2.05) | 0.72                       | (0.69 , 0.74) | 0.63                       | (0.59 , 0.67) |
| 2008009 | 0.26                                | (0.24 , 0.28) | 0.28                                | (0.26 , 0.30) | 2.76                          | (2.50 , 3.03) | 2.26                          | (2.03 , 2.49) | 0.72                       | (0.69 , 0.75) | 0.67                       | (0.64 , 0.71) |
| 2008081 | 0.28                                | (0.25 , 0.31) | 0.30                                | (0.27 , 0.33) | 2.26                          | (1.99 , 2.54) | 1.88                          | (1.62 , 2.14) | 0.68                       | (0.65 , 0.71) | 0.64                       | (0.60 , 0.68) |
| 2008041 | 0.34                                | (0.31 , 0.36) | 0.29                                | (0.26 , 0.31) | 2.48                          | (2.24 , 2.72) | 2.01                          | (1.79 , 2.23) | 0.70                       | (0.68 , 0.73) | 0.66                       | (0.62 , 0.69) |
| 2008061 | 0.28                                | (0.26 , 0.30) | 0.31                                | (0.28 , 0.34) | 2.10                          | (1.89 , 2.33) | 1.82                          | (1.57 , 2.08) | 0.67                       | (0.64 , 0.70) | 0.63                       | (0.59 , 0.67) |
| 2008087 | 0.30                                | (0.27 , 0.33) | 0.34                                | (0.32 , 0.37) | 2.24                          | (1.97 , 2.53) | 1.71                          | (1.46 , 1.96) | 0.68                       | (0.65 , 0.72) | 0.61                       | (0.57 , 0.66) |
| 2008147 | 0.31                                | (0.29 , 0.33) | 0.32                                | (0.29 , 0.34) | 2.61                          | (2.39 , 2.84) | 1.87                          | (1.66 , 2.09) | 0.71                       | (0.69 , 0.74) | 0.64                       | (0.60 , 0.67) |
| 2008258 | 0.26                                | (0.24 , 0.28) | 0.30                                | (0.28 , 0.32) | 1.74                          | (1.56 , 1.94) | 1.41                          | (1.20 , 1.64) | 0.61                       | (0.59 , 0.64) | 0.55                       | (0.51 , 0.58) |
| 2008130 | 0.29                                | (0.26 , 0.31) | 0.32                                | (0.30 , 0.35) | 2.39                          | (2.15 , 2.65) | 2.10                          | (1.86 , 2.34) | 0.70                       | (0.67 , 0.72) | 0.66                       | (0.62 , 0.70) |
| 2008100 | 0.27                                | (0.24 , 0.29) | 0.31                                | (0.28 , 0.34) | 2.26                          | (2.03 , 2.51) | 1.65                          | (1.40 , 1.91) | 0.68                       | (0.66 , 0.71) | 0.60                       | (0.57 , 0.65) |

| Family  | cohumulone<br>(% of $\alpha$ -acid) |               | cohumulone<br>(% of $\alpha$ -acid) |               | $\alpha$ -acid: $\beta$ -acid |               | $\alpha$ -acid: $\beta$ -acid |               | $\alpha$ -acid:total resin |               | $\alpha$ -acid:total resin |               |
|---------|-------------------------------------|---------------|-------------------------------------|---------------|-------------------------------|---------------|-------------------------------|---------------|----------------------------|---------------|----------------------------|---------------|
|         | 16 months *                         |               | 28 months *                         |               | 16 months *                   |               | 28 months *                   |               | 16 months *                |               | 28 months *                |               |
| 2008132 | 0.30                                | (0.27 , 0.32) | 0.31                                | (0.28 , 0.34) | 2.13                          | (1.89 , 2.39) | 1.63                          | (1.39 , 1.89) | 0.67                       | (0.64 , 0.70) | 0.60                       | (0.56 , 0.64) |
| 2008256 | 0.30                                | (0.28 , 0.33) | 0.32                                | (0.29 , 0.35) | 1.67                          | (1.45 , 1.90) | 1.37                          | (1.14 , 1.62) | 0.60                       | (0.57 , 0.63) | 0.51                       | (0.47 , 0.54) |
| 2008093 | 0.30                                | (0.28 , 0.32) | 0.32                                | (0.30 , 0.34) | 2.40                          | (2.18 , 2.62) | 1.80                          | (1.59 , 2.02) | 0.70                       | (0.67 , 0.72) | 0.63                       | (0.59 , 0.66) |
| 2008108 | 0.29                                | (0.27 , 0.31) | 0.31                                | (0.29 , 0.33) | 1.83                          | (1.64 , 2.02) | 1.59                          | (1.37 , 1.82) | 0.61                       | (0.59 , 0.64) | 0.59                       | (0.55 , 0.62) |
| 2008179 | 0.24                                | (0.22 , 0.26) | 0.28                                | (0.26 , 0.30) | 1.95                          | (1.74 , 2.17) | 1.72                          | (1.49 , 1.95) | 0.65                       | (0.62 , 0.67) | 0.61                       | (0.58 , 0.65) |
| 2008192 | 0.34                                | (0.31 , 0.37) | 0.32                                | (0.29 , 0.34) | 1.67                          | (1.46 , 1.90) | 1.58                          | (1.34 , 1.83) | 0.60                       | (0.57 , 0.63) | 0.58                       | (0.54 , 0.62) |
| 2008089 | 0.29                                | (0.27 , 0.31) | 0.32                                | (0.29 , 0.34) | 2.25                          | (2.00 , 2.52) | 1.81                          | (1.58 , 2.04) | 0.68                       | (0.66 , 0.71) | 0.63                       | (0.60 , 0.67) |
| 2008064 | 0.28                                | (0.26 , 0.31) | 0.30                                | (0.27 , 0.33) | 2.42                          | (2.14 , 2.72) | 1.81                          | (1.56 , 2.07) | 0.70                       | (0.66 , 0.73) | 0.63                       | (0.59 , 0.67) |
| 2008269 | 0.34                                | (0.31 , 0.36) | 0.31                                | (0.28 , 0.35) | 1.94                          | (1.69 , 2.21) | 1.77                          | (1.49 , 2.06) | 0.64                       | (0.61 , 0.67) | 0.62                       | (0.57 , 0.67) |
| 2008059 | 0.30                                | (0.27 , 0.32) | 0.33                                | (0.30 , 0.35) | 2.14                          | (1.88 , 2.42) | 1.57                          | (1.35 , 1.80) | 0.67                       | (0.64 , 0.70) | 0.59                       | (0.55 , 0.63) |
| 2008047 | 0.32                                | (0.30 , 0.35) | 0.35                                | (0.33 , 0.38) | 2.21                          | (1.96 , 2.48) | 1.92                          | (1.69 , 2.16) | 0.68                       | (0.65 , 0.71) | 0.64                       | (0.60 , 0.68) |
| 2008194 | 0.29                                | (0.27 , 0.32) | 0.30                                | (0.27 , 0.32) | 2.05                          | (1.81 , 2.31) | 1.64                          | (1.42 , 1.87) | 0.66                       | (0.63 , 0.69) | 0.61                       | (0.57 , 0.64) |
| 2008232 | 0.27                                | (0.25 , 0.29) | 0.30                                | (0.27 , 0.32) | 1.79                          | (1.57 , 2.03) | 1.38                          | (1.17 , 1.60) | 0.62                       | (0.59 , 0.65) | 0.54                       | (0.51 , 0.58) |
| 2008173 | 0.26                                | (0.23 , 0.28) | 0.31                                | (0.29 , 0.34) | 1.91                          | (1.66 , 2.18) | 1.73                          | (1.50 , 1.96) | 0.64                       | (0.61 , 0.68) | 0.62                       | (0.58 , 0.65) |
| 2008120 | 0.26                                | (0.24 , 0.29) | 0.30                                | (0.27 , 0.32) | 1.96                          | (1.72 , 2.21) | 1.67                          | (1.45 , 1.91) | 0.65                       | (0.62 , 0.68) | 0.61                       | (0.57 , 0.65) |
| 2008262 | 0.29                                | (0.27 , 0.32) | 0.31                                | (0.28 , 0.33) | 2.28                          | (2.03 , 2.55) | 1.71                          | (1.46 , 1.97) | 0.69                       | (0.66 , 0.72) | 0.61                       | (0.57 , 0.65) |
| 2008187 | 0.28                                | (0.26 , 0.30) | 0.30                                | (0.27 , 0.32) | 2.23                          | (1.98 , 2.50) | 1.78                          | (1.55 , 2.01) | 0.68                       | (0.65 , 0.71) | 0.63                       | (0.59 , 0.66) |
| 2008051 | 0.32                                | (0.29 , 0.34) | 0.33                                | (0.30 , 0.36) | 1.98                          | (1.74 , 2.23) | 1.74                          | (1.49 , 2.00) | 0.65                       | (0.62 , 0.68) | 0.62                       | (0.58 , 0.66) |
| 2008198 | 0.30                                | (0.28 , 0.33) | 0.32                                | (0.29 , 0.34) | 2.13                          | (1.89 , 2.39) | 1.85                          | (1.62 , 2.09) | 0.67                       | (0.64 , 0.70) | 0.64                       | (0.60 , 0.67) |
| 2008054 | 0.28                                | (0.26 , 0.30) | 0.31                                | (0.29 , 0.34) | 2.22                          | (2.01 , 2.44) | 1.62                          | (1.41 , 1.83) | 0.68                       | (0.66 , 0.71) | 0.59                       | (0.56 , 0.62) |
| 2008244 | 0.28                                | (0.26 , 0.30) | 0.31                                | (0.29 , 0.34) | 2.27                          | (2.05 , 2.50) | 1.71                          | (1.49 , 1.95) | 0.68                       | (0.66 , 0.71) | 0.61                       | (0.57 , 0.65) |
| 2008177 | 0.29                                | (0.26 , 0.32) | 0.29                                | (0.26 , 0.31) | 2.16                          | (1.90 , 2.44) | 1.53                          | (1.31 , 1.75) | 0.67                       | (0.64 , 0.71) | 0.58                       | (0.55 , 0.62) |
| 2008117 | 0.34                                | (0.31 , 0.36) | 0.36                                | (0.34 , 0.39) | 2.28                          | (2.04 , 2.53) | 1.79                          | (1.58 , 2.01) | 0.69                       | (0.66 , 0.71) | 0.63                       | (0.60 , 0.67) |
| 2008016 | 0.27                                | (0.25 , 0.29) | 0.31                                | (0.29 , 0.34) | 1.75                          | (1.57 , 1.95) | 1.74                          | (1.52 , 1.98) | 0.62                       | (0.60 , 0.64) | 0.62                       | (0.58 , 0.66) |
| 2008267 | 0.26                                | (0.24 , 0.28) | 0.32                                | (0.30 , 0.35) | 2.22                          | (1.97 , 2.49) | 1.92                          | (1.69 , 2.16) | 0.68                       | (0.65 , 0.71) | 0.64                       | (0.61 , 0.68) |
| 2008040 | 0.30                                | (0.27 , 0.33) | 0.33                                | (0.30 , 0.36) | 2.35                          | (2.08 , 2.65) | 1.92                          | (1.67 , 2.19) | 0.69                       | (0.66 , 0.72) | 0.64                       | (0.60 , 0.68) |
| 2008218 | 0.27                                | (0.25 , 0.29) | 0.31                                | (0.29 , 0.33) | 2.42                          | (2.19 , 2.66) | 2.07                          | (1.83 , 2.31) | 0.70                       | (0.67 , 0.73) | 0.66                       | (0.62 , 0.70) |
| 2008070 | 0.28                                | (0.26 , 0.31) | 0.24                                | (0.21 , 0.26) | 1.93                          | (1.70 , 2.18) | 1.87                          | (1.61 , 2.13) | 0.64                       | (0.61 , 0.67) | 0.64                       | (0.59 , 0.68) |
| 2008102 | 0.30                                | (0.28 , 0.33) | 0.32                                | (0.30 , 0.35) | 2.19                          | (1.93 , 2.48) | 1.72                          | (1.49 , 1.95) | 0.68                       | (0.65 , 0.71) | 0.62                       | (0.58 , 0.66) |
| 2008078 | 0.28                                | (0.25 , 0.31) | 0.34                                | (0.31 , 0.37) | 2.20                          | (1.93 , 2.48) | 1.66                          | (1.41 , 1.91) | 0.68                       | (0.64 , 0.71) | 0.61                       | (0.57 , 0.65) |
| 2008074 | 0.28                                | (0.26 , 0.30) | 0.30                                | (0.28 , 0.32) | 2.30                          | (2.08 , 2.54) | 2.07                          | (1.85 , 2.30) | 0.69                       | (0.66 , 0.72) | 0.66                       | (0.63 , 0.70) |
