# Supplementary material for: Quantitative genetic parameters for yield, plant growth and cone chemical traits in hop (Humulus lupulus L.)
Source: PubMed Central journal article supplement (PMC3927220; doi:10.1186/1471-2156-15-22), 2014-02-13
Supplement: 1471-2156-15-22-S3.pdf [file 1471-2156-15-22-S3.pdf]

**Additional file 3 The female parents of a progeny trial used to investigate quantitative genetic variation in hop.**

‘Hop accession’ refers to the cultivar name or accession number of the hop accessions used as a female parent. ‘Origin’ refers to the country where the hop accessions were produced.

| <b>Hop accession</b> | <b>Origin</b> |
|----------------------|---------------|
| 21055                | USA           |
| 21194                | USA           |
| 00-999               | Australia     |
| 15-72-1              | unknown       |
| 17/54/12             | UK            |
| 21055 (2n)           | USA           |
| 27/70/4              | UK            |
| 30-74-32             | Australia     |
| 71-75-1              | Australia     |
| 8428-036             | Australia     |
| 8451-077             | Australia     |
| 89-012-017           | Australia     |
| 89-012-024           | Australia     |
| 89-012-052           | Australia     |
| 89-022-020           | Australia     |
| 89-022-033           | Australia     |
| 89-103-005           | Australia     |
| 89-123-001           | Australia     |
| 89-124-018           | Australia     |
| 89-134-022           | Australia     |
| 89-135-011           | Australia     |
| 89-135-016           | Australia     |
| 90-014-095           | Australia     |
| 91-004-013           | Australia     |
| 91-008-046           | Australia     |
| 91-021-020           | Australia     |
| 91-031-021           | Australia     |
| 94-138-006 (2n)      | Australia     |
| 97-113-003           | Australia     |
| AF 3/26              | South Africa  |
| AHIL                 | Slovenia      |
| AQUILA               | USA           |
| AURORA               | Slovenia      |
| B23                  | Australia     |
| B24/23               | Australia     |
| BANNER               | USA           |
| BH 2/72              | South Africa  |
| BOBEK                | Slovenia      |
| BREWERS GOLD         | UK            |
| BRUNY ISLAND         | Australia     |
| BUKET                | Slovenia      |
| BULLION              | UK            |
| C10                  | Australia     |
| CHINOOK              | USA           |
| CLUSTER              | USA           |
| COLUMBUS             | USA           |
| D6                   | Australia     |
| E2                   | USA           |
| E-85-16              | Australia     |
| E-85-20              | Australia     |
| EASTERN GOLD         | Japan         |
| ED-85-36             | Australia     |
| EG-85-17             | Australia     |
| EI-85-33             | Australia     |

| <b>Hop accession</b> | <b>Origin</b>  |
|----------------------|----------------|
| ELSASSER             | France         |
| EN-85-32             | Australia      |
| EP-86-4              | Australia      |
| EROICA               | USA            |
| EX FRF               | Australia      |
| F-84-19              | Australia      |
| FK21                 | Japan          |
| G-85-9               | Australia      |
| GALENA               | USA            |
| GOLDING              | UK             |
| HALLERTAU            | Germany        |
| HERSBRUCKER          | Germany        |
| HERSBRUCKER G        | Germany        |
| JAPANESE ROGUE       | Japan          |
| K56                  | USA            |
| K-85-9               | Australia      |
| L1                   | USA            |
| L1 EX FRF            | USA            |
| LA-85-70             | Australia      |
| LB-85-2              | Australia      |
| ME-85-33             | Australia      |
| NORTHERN BREWER      | UK             |
| NUGGET               | USA            |
| OM26                 | UK             |
| PERLE                | Germany        |
| S-5524               | Australia      |
| SAAZ 36              | Czech Republic |
| SHINSHUWASE          | Japan          |
| SMOOTHCONE           | New Zealand    |
| SOUTHERN BREWER      | South Africa   |
| STYRIAN              | Australia      |
| SWISS TETTNANG       | Germany        |
| TILlicum             | USA            |
| U-85-10              | Australia      |
| UNKNOWN 09           | Australia      |
| V-85-9               | Australia      |
| VOJVODINA            | Slovenia       |
| W-86-26              | Australia      |
| WYE CHALLENGER       | UK             |
| WYE NORTHDOWN        | UK             |
| WYE TARGET           | UK             |
| YEOMAN               | UK             |
| ZENITH               | UK             |

Each accession was used as a female parent once, except for accessions 21194, 21055(2n), NUGGET, CLUSTER and SWISS TETTNANG which were used twice; and individuals 21055 and 94-138-006 (2n) which were used four times.
